# Supplementary material for: Reduced prevalence of small-for-gestational-age and preterm birth for women of low socioeconomic position: a population-based cohort study comparing antenatal midwifery and physician models of care
Source: PubMed Central journal article supplement — BMJ Open. 2018 Oct 3;8(10):e022220. doi: 10.1136/bmjopen-2018-022220 (PMC6169769; doi:10.1136/bmjopen-2018-022220), 2018-10-03
Supplement: bmjopen-2018-022220.draft_revisions.pdf [file bmjopen-2018-022220.draft_revisions.pdf]

# BMJ Open

BMJ Open is committed to open peer review. As part of this commitment we make the peer review history of every article we publish publicly available.

When an article is published we post the peer reviewers' comments and the authors' responses online. We also post the versions of the paper that were used during peer review. These are the versions that the peer review comments apply to.

The versions of the paper that follow are the versions that were submitted during the peer review process. They are not the versions of record or the final published versions. They should not be cited or distributed as the published version of this manuscript.

BMJ Open is an open access journal and the full, final, typeset and author-corrected version of record of the manuscript is available on our site with no access controls, subscription charges or pay-per-view fees (<http://bmjopen.bmj.com>).

If you have any questions on BMJ Open's open peer review process please email [info.bmjopen@bmj.com](mailto:info.bmjopen@bmj.com)

# BMJ Open

## Reduced prevalence of small-for-gestational-age and preterm birth for women of low socioeconomic position: a population-based cohort study comparing antenatal midwifery and physician models of care

|                               |                                                                                                                                                                                                                                                                                                                                                                                                                                                                                                                                                                                                                                                                                                  |
|-------------------------------|--------------------------------------------------------------------------------------------------------------------------------------------------------------------------------------------------------------------------------------------------------------------------------------------------------------------------------------------------------------------------------------------------------------------------------------------------------------------------------------------------------------------------------------------------------------------------------------------------------------------------------------------------------------------------------------------------|
| Journal:                      | <i>BMJ Open</i>                                                                                                                                                                                                                                                                                                                                                                                                                                                                                                                                                                                                                                                                                  |
| Manuscript ID                 | bmjopen-2018-022220                                                                                                                                                                                                                                                                                                                                                                                                                                                                                                                                                                                                                                                                              |
| Article Type:                 | Research                                                                                                                                                                                                                                                                                                                                                                                                                                                                                                                                                                                                                                                                                         |
| Date Submitted by the Author: | 09-Feb-2018                                                                                                                                                                                                                                                                                                                                                                                                                                                                                                                                                                                                                                                                                      |
| Complete List of Authors:     | McRae, Daphne; University of British Columbia, School of Population and Public Health<br>Janssen, Patricia; University of British Columbia, School of Population and Public Health<br>Vedam, Saraswathi; University of British Columbia, Birth Place Lab, Department of Family Practice<br>Mayhew, Maureen; University of British Columbia, School of Population and Public Health<br>Mpofu, Deborah; University of Saskatchewan, Dept. of Community Health and Epidemiology; Saskatoon Health Region, Saskatoon City Hospital<br>Teucher, Ulrich; University of Saskatchewan, Dept. of Psychology<br>Muhajarine, Nazeem; University of Saskatchewan, Dept. of Community Health and Epidemiology |
| Keywords:                     | midwifery, socioeconomic status, birth outcomes, Quality in health care < HEALTH SERVICES ADMINISTRATION & MANAGEMENT, Fetal medicine < OBSTETRICS, Maternal medicine < OBSTETRICS                                                                                                                                                                                                                                                                                                                                                                                                                                                                                                               |
|                               |                                                                                                                                                                                                                                                                                                                                                                                                                                                                                                                                                                                                                                                                                                  |

SCHOLARONE™  
Manuscripts

1  
2  
3 **Reduced prevalence of small-for-gestational-age and preterm birth for women of low**  
4 **socioeconomic position: a population-based cohort study comparing antenatal midwifery**  
5 **and physician models of care**  
6

7 **Correspondence to:**

8 Daphne McRae  
9 School of Population and Public Health,  
10 University of British Columbia  
11 2206 E Mall, Vancouver BC Canada V6T 1Z3  
12 Ph: +1 604-794-7729 Fax : +1 604-822-0640  
13 daphne.mcrae@ubc.ca  
14  
15

16  
17 Patricia A Janssen  
18 School of Population and Public Health,  
19 University of British Columbia  
20 2206 East Mall Vancouver BC Canada V6T 1Z3  
21  
22

23  
24 Saraswathi Vedam  
25 Birth Place Lab, Dept. of Family Practice  
26 University of British Columbia  
27 Suite 304 - 5950 University Boulevard Vancouver BC Canada V6T 1Z3  
28  
29

30  
31 Maureen Mayhew  
32 School of Population and Public Health  
33 University of British Columbia  
34 2206 East Mall Vancouver BC Canada V6T 1Z3  
35

36  
37 Deborah Mpofu  
38 Saskatoon City Hospital  
39 Saskatoon Health Region  
40 701 Queen Street, Saskatoon SK S7K 0M7  
41 and  
42 Dept. of Community Health and Epidemiology  
43 University of Saskatchewan  
44 Box 7 Health Science Building 107 Wiggins Road Saskatoon SK Canada S7N 5E5  
45  
46

47  
48 Ulrich Teucher  
49 Dept. of Psychology  
50 University of Saskatchewan  
51 9 Campus Drive Saskatoon SK Canada S7N 5A5  
52

53  
54 Nazeem Muhajarine  
55 Dept. of Community Health and Epidemiology  
56 University of Saskatchewan  
57

1  
2  
3 Box 7 Health Science Building 107 Wiggins Road Saskatoon SK Canada S7N 5E5  
4  
5

6 **Keywords:** midwifery, socioeconomic status, birth outcomes, quality in health care, fetal  
7  
8 medicine, maternal medicine  
9

10  
11 **Word count:** 3,886  
12  
13  
14  
15  
16  
17  
18  
19  
20  
21  
22  
23  
24  
25  
26  
27  
28  
29  
30  
31  
32  
33  
34  
35  
36  
37  
38  
39  
40  
41  
42  
43  
44  
45  
46  
47  
48  
49  
50  
51  
52  
53  
54  
55  
56

For peer review only

## ABSTRACT

**Objective:** Our aim was to investigate if antenatal midwifery care was associated with lower odds of small-for-gestational-age (SGA) birth, preterm birth (PTB), or low birth weight (LBW) compared to general practitioner (GP) or obstetrician (OB) models of care for women of low socioeconomic position.

**Setting:** This population level, retrospective cohort study used province-wide maternity, medical billing, and demographic data from British Columbia, Canada.

**Participants:** Our study included 57,872 pregnant women, with low socioeconomic position, who were residents of British Columbia, Canada, carried a singleton fetus, had low to moderate medical/obstetric risk, delivered between 2005-2012, and received medical insurance premium assistance.

**Primary and secondary outcome measures:** We report rates, adjusted odds ratios (aOR), and 95% confidence intervals for the primary outcome, SGA birth (< the 10th percentile), and secondary outcomes, PTB (< 37 weeks completed gestation), and LBW (< 2,500 g.).

**Results:** Our sample included 4,705 midwifery patients, 45,114 GP patients, and 8,053 OB patients. Odds of SGA birth were reduced for patients receiving antenatal midwifery vs. GP (aOR 0.71, 95% CI: 0.62-0.82) or OB care (aOR 0.59, 95% CI: 0.50-0.69). Odds of PTB were lower for antenatal midwifery vs. GP (aOR 0.74, 95% CI: 0.63-0.86) or OB patients (aOR 0.53, 95% CI: 0.45-0.62). Odds of LBW were reduced for midwifery vs. GP (aOR 0.66, 95% CI: 0.53-0.82) or OB patients (aOR 0.43, 95% CI: 0.34-0.54).

**Conclusion:** Antenatal midwifery care in British Columbia, Canada was associated with lower odds of SGA birth, PTB, and LBW, for women of low socioeconomic position, compared to

1  
2  
3 physician models of care. Results support the development of policy to ensure antenatal  
4  
5 midwifery care is available and accessible for women of low socioeconomic position. Future  
6  
7 research is needed to determine the underlying mechanisms linking midwifery care to better birth  
8  
9 outcomes for women of low socioeconomic position.  
10  
11  
12  
13  
14  
15  
16  
17  
18  
19  
20  
21  
22  
23  
24  
25  
26  
27  
28  
29  
30  
31  
32  
33  
34  
35  
36  
37  
38  
39  
40  
41  
42  
43  
44  
45  
46  
47  
48  
49  
50  
51  
52  
53  
54  
55  
56  
57  
58  
59  
60

For peer review only

### Strengths and limitations of this study

- A large, population-level cohort study (57,872) representing the majority of pregnant women with low socioeconomic position in British Columbia, Canada (2005-2012)
- A rigorous modelling approach controlled for correlation in outcomes at a family and community level
- Findings are generalizable to other high resource settings which offer similar, publicly funded midwifery services
- Limited by self-selection of care provider, which could have introduced differences between cohorts in social/health risks not documented in the maternity record
- A post hoc analysis controlling for antepartum morbidity was conducted to assess the magnitude of self-selection bias

## INTRODUCTION

As established in the literature, women of low socioeconomic position (SEP) are more susceptible to poor infant birth outcomes compared to women of higher SEP.<sup>1</sup> In response to this inequity, researchers have sought to determine if antenatal midwifery care could minimize the risk of adverse newborn outcomes for women of low SEP. In a 2016 scoping review of randomized trials and observational studies from high resource countries (1990 to 2015), comparing antenatal midwifery versus physician-led care for women of low SEP,<sup>2</sup> results indicated lower risk of preterm birth (PTB),<sup>3</sup> low birth weight (LBW)<sup>4</sup>, and/or very low birth weight (VLBW)<sup>4,5</sup> for midwives' patients in some studies (or subpopulations within studies), yet other studies indicated no significant difference in outcomes by provider-type.<sup>6-8</sup> Almost all of these studies were limited by non-representative sampling,<sup>3,6,7</sup> inadequate study power,<sup>6,8-10</sup> and/or failure to control for confounders.<sup>4,6</sup> All but one study<sup>6</sup> were conducted in the United States. Addressing these limitations, we conducted a large, population level study among women of low SEP with low to moderate medical/obstetric risk to investigate if antenatal midwifery care was associated with lower odds of small-for-gestational-age (SGA) birth, PTB, or LBW compared to general practitioner (GP) or obstetrician (OB) models of care.

## METHODS

### Study design

Using a retrospective cohort design we examined the association between antenatal models of care and odds of SGA birth, PTB, or LBW among women of low SEP with low to moderate medical/obstetric risk. Model of care was ascertained using practitioners' antenatal service billing records. In British Columbia (BC) GPs and OBs are compensated by the Ministry of



1  
2  
3 Health for each antenatal visit whereas midwives are compensated according to partial or full  
4 trimester of care. Antenatal care with a GP was defined as greater than or equal to three routine  
5 antenatal visits with a GP, and less than or equal to one routine antenatal visit with an OB, or less  
6 than or equal to one partial trimester of midwifery care. Antenatal care with an OB was  
7 operationalized as greater than or equal to three routine antenatal visits with an OB, and less than  
8 or equal to one routine antenatal visit with a GP, or less than or equal to one partial trimester of  
9 midwifery care. Antenatal midwifery care was operationalized as greater than or equal to two  
10 partial or full trimesters of midwifery care (equivalent to a *minimum* exposure of three routine  
11 antenatal physician visits), and less than or equal to one routine GP or OB antenatal visit.  
12  
13  
14  
15  
16  
17  
18  
19  
20  
21  
22  
23  
24  
25  
26  
27  
28  
29  
30  
31  
32  
33  
34  
35  
36  
37  
38  
39  
40  
41  
42  
43  
44  
45  
46  
47  
48  
49  
50  
51  
52  
53  
54  
55  
56  
57  
58  
59  
60

Obstetrician consultations were not included as routine antenatal visits. Ethics approval for this study was granted from the University of Saskatchewan, Biomedical Research Ethics Board (Reg. No. #1 00001471, #2 00008358) and the University of British Columbia, Children's and Women's Health Center of BC Research Ethics Board (Reg. No. H14-01629).

In BC women select their preferred type of maternity caregiver depending on practitioner availability and as appropriate to their need for specialist care. In rare instances women may have planned, shared-care between a small pool of midwives and GPs. Midwifery care in the Canadian context is equivalent to caseload midwifery care as it is practiced in Australia, the UK, and other European countries. Midwives provide holistic, continuity of care in which a midwife, or a small pool of midwives, known to a women is/are available on-call 24 hours a day.<sup>11</sup> The midwifery model is relationship-based with antenatal appointments lasting 30 to 60 minutes on average<sup>12</sup> to facilitate counselling, education, emotional support, and informed choice.<sup>11</sup> When a midwifery patient has moderate perinatal risk, as outlined in the BC College of Midwives'

1  
2  
3 guidelines,<sup>13</sup> midwives are required to consult with a physician (generally an OB) and if high-  
4  
5 risk complications arise they will recommend a transfer to OB care.  
6  
7

8  
9  
10 While many GPs and some OBs function in a continuity of care, relationship-based model, the  
11  
12 volume of need and fee-for-service funding model for physicians leads to shorter antenatal visits.  
13  
14 Within the midwifery model, fees are all inclusive based on care and annual caseloads are  
15  
16 limited allowing for longer antenatal visits on average.<sup>11</sup> All three types of providers follow the  
17  
18 same schedule of antenatal visits.  
19  
20  
21  
22  
23

## 24 **Outcomes**

25  
26 Our outcome data for this study was obtained from the BC Perinatal Data Registry (PDR).<sup>14</sup>  
27  
28 Registry data was abstracted from hospital and home birth records. As well, International  
29  
30 Statistical Classification of Diseases (ICD-10-CA) codes were imported to the PDR from the  
31  
32 Canadian Institutes of Health Information Discharge Abstract Database. The PDR captures  
33  
34 approximately 99% of all BC births with validation studies reporting a 97% accuracy rate over  
35  
36 all data fields.<sup>15</sup>  
37  
38  
39  
40  
41

42 The primary outcome variable was SGA birth (< 10th percentile) according to Kierans and  
43  
44 colleagues' sex-specific birth weight charts.<sup>16</sup> Secondary outcomes included PTB (< 37 weeks  
45  
46 completed gestation), and LBW (< 2,500 g.). LBW may be attributable to PTB, intrauterine  
47  
48 growth restriction, or both and is reported here to facilitate comparison with other studies.  
49  
50  
51

## 52 **Study sample**

1  
2  
3 Our study sample included women who: were residents of BC, received antenatal midwifery, GP  
4 or OB care, carried a singleton fetus, had low to moderate medical/obstetric risk, delivered  
5 between 1 January 2005 and 31 December 2012, received medical insurance premium assistance,  
6 and were not registered Status Indian. Women were classified as having low to moderate medical  
7 and obstetric risk if they were eligible for midwifery care throughout the antenatal period  
8 according to guidelines produced by the College of Midwives of BC<sup>13</sup> and expert advice from  
9 our clinical team members. Conditions rendering women ineligible for midwifery care included  
10 diseases of the blood, blood forming organs or of the circulatory system, pre-existing  
11 hypertension or diabetes, liver disorders, tuberculosis, or malaria, as recorded in the maternity  
12 record, history of more than one PTB, more than two caesarean section deliveries, or more than  
13 two spontaneous abortions (prior to 20 weeks completed gestation), or in the current pregnancy  
14 pre-eclampsia/eclampsia, placenta previa with hemorrhage, isoimmunisation, incompetent  
15 cervix, hyperemesis gravidarum with metabolic disturbance, or age less than 14 years. (See  
16 Appendix A for a complete description of inclusion/exclusion variables and ICD 10-CA codes.)  
17  
18  
19  
20  
21  
22  
23  
24  
25  
26  
27  
28  
29  
30  
31  
32  
33  
34  
35  
36  
37

38 Because the key indicator used to assess low SEP, medical insurance premium assistance, was  
39 not available for Status women (they had their insurance premiums paid through Health Canada)  
40 they were excluded from the study. We operationalized low SEP as receipt of BC Medical  
41 Services Plan (MSP) regular premium subsidy assistance during the year of delivery.<sup>17</sup> Eligibility  
42 for this assistance is based on family, net income ceiling exclusive of federal or provincial  
43 childcare or disability benefits. During the study period the ceiling ranged from \$24,000 to  
44 \$30,000 for a family of three depending on the year of receipt.<sup>17</sup> This is comparable to Statistics  
45  
46  
47  
48  
49  
50  
51  
52  
53  
54  
55  
56  
57  
58  
59  
60

1  
2  
3 Canada's before-tax, low income cut-off for a family of three (\$23,358 to \$33,933 as of  
4  
5 2008), which is a standard measure of poverty.<sup>18</sup>  
6  
7  
8  
9

### 10 **Sample Size Estimates**

11  
12 During the study period women living in the poorest neighbourhood income quintiles in Canada  
13  
14 experienced a 9.9% prevalence of SGA.<sup>19</sup> To detect an absolute difference in prevalence of 3%  
15  
16 from a baseline of 9.9% we required 1,394 women in each exposure category with type I error  
17  
18 set at  $p=0.05$  two sided, and a type II error set at 0.20. We estimated 16.2% of the total BC  
19  
20 population received MSP premium assistance,<sup>20</sup> equivalent to 4,154 midwifery patients and  
21  
22 36,255 physician patients during the study period, excluding those who would not meet our  
23  
24 criteria for low to moderate obstetrical risk. Sample size calculations were conducted using  
25  
26 OpenEpi 3.01.  
27  
28  
29  
30  
31  
32

### 33 **Statistical Analyses**

34  
35 To assess the association of model of care and SGA, PTB, and LBW, we developed logistic  
36  
37 regression models using a Generalized Estimating Equation approach.<sup>21</sup> This method allowed for  
38  
39 adjustment of variance estimates to accommodate potential correlation for women delivering  
40  
41 multiple infants during the study period and for clustering of effects by community.<sup>21</sup> Differing  
42  
43 correlation structures were specified and compared using the Quasi-Likelihood Under the  
44  
45 Independence model Criteria (QIC) to determine the most appropriate correlation structure (the  
46  
47 smaller the QIC the better the structure's fit).<sup>21</sup> Binomial distributions were specified and models  
48  
49 fitted with an exchangeable correlation structure (in which observations from the same cluster  
50  
51 are assumed to be equally correlated) using logit link functions.<sup>21</sup>  
52  
53  
54  
55  
56  
57  
58  
59  
60

1  
2  
3  
4  
5 We identified potential confounders, tested in our model, from the literature and based on our  
6 clinical experience. Variables analyzed from the PDR included maternal age, parity, medical  
7 risk, prior obstetric risk, pre-pregnancy BMI, infant sex, delivery year, smoking status, substance  
8 use, alcohol use, mental illness, and northern residence. (See Appendix B for a complete list of  
9 covariate descriptions, data sources, and ICD 10-CA codes.) From the Province of BC Statistics  
10 Division (BC Stats) we obtained socioeconomic rankings and income inequality rankings for  
11 each Local Health Area (LHA)—89 geographic and health administrative regions in BC that  
12 aggregate to larger Health Authorities.<sup>22</sup> Income inequality rankings were based on the  
13 proportion of each LHA's total income from all households earning less than the median income  
14 compared to each LHA's total income from all households. In an entirely equitable LHA the  
15 poorest half of the households would garner 50% of the total income.<sup>22</sup> We tested this variable  
16 as a potential confounder because it has been hypothesized that residence in a high income  
17 inequality area may increase the risk of poor self-concept potentially leading to lower  
18 commitment to pregnancy and unhealthy lifestyle choices.<sup>23</sup> From the BC Ministry of Health we  
19 received data on women's neighbourhood income quintile, depending on residential postal code  
20 at delivery,<sup>24</sup> and receipt of social assistance<sup>17</sup>—public financial assistance granted to low  
21 income individuals.  
22  
23  
24  
25  
26  
27  
28  
29  
30  
31  
32  
33  
34  
35  
36  
37  
38  
39  
40  
41  
42  
43  
44  
45  
46

47 In logistic regression univariate analyses we identified variables that had Wald chi-square values  
48 of  $p < 0.25$  and retained these for our initial multivariable models.<sup>25</sup> For the final variable  
49 selection we used a manual, backward elimination approach. Variables with a Wald chi-square  
50 p-value  $\geq 0.05$  were excluded from each multivariable model one at a time, beginning with the  
51  
52  
53  
54  
55  
56  
57  
58  
59  
60

1  
2  
3 variable having the largest p-value.<sup>25</sup> After suspected confounders were removed from a model,  
4  
5 coefficient estimates from models with and without the variable were examined to determine if  
6  
7 the exclusion produced a greater than 20% change in any coefficient in the model. If this  
8  
9 magnitude of change was detected, indicating a meaningful adjustment to (an)other variable(s),  
10  
11 the eliminated variable was returned to the model.<sup>25, p92</sup> This process was repeated until only  
12  
13 variables meeting the criteria or those of clinical significance remained in the model. For births  
14  
15 with no missing information we report unadjusted and adjusted odds ratios and 95% confidence  
16  
17 intervals for SGA, PTB, and LBW by model of care.  
18  
19  
20  
21  
22  
23

24  
25 Lastly, we investigated residual confounding potentially arising from self-selection bias  
26  
27 associated with pre-existing morbidity. If, for example, women chose OB care because of prior  
28  
29 health conditions which were not documented in the PDR, then the OB cohort could be  
30  
31 comprised of systematically higher-risk patients. To control for these conditions we repeated our  
32  
33 regression modelling using our final models with adjustment for select antepartum morbidities  
34  
35 (see definition in Table 1). SAS Enterprise 7.1 (SAS Institute, Cary, NC, USA) was used for data  
36  
37 analysis.  
38  
39  
40  
41  
42  
43  
44  
45  
46  
47  
48  
49  
50  
51  
52  
53  
54  
55  
56  
57  
58  
59  
60

**Table 1: Frequencies and proportions of maternal characteristics by antenatal model of care, British Columbia, 2005-2012 (n=57,872)**

| Characteristics                                        | Antenatal Model of Care |                    |                   |
|--------------------------------------------------------|-------------------------|--------------------|-------------------|
|                                                        | MW<br>n=4,705 (%)       | GP<br>n=45,114 (%) | OB<br>n=8,053 (%) |
| <b>Age (yrs.)</b>                                      |                         |                    |                   |
| 14-19                                                  | 155 (3·29)              | 4,697 (10·41)      | 338 (4·20)        |
| 20-24                                                  | 893 (18·98)             | 14,789 (32·78)     | 1,447 (17·97)     |
| 25-29                                                  | 1,619 (34·41)           | 13,161 (29·17)     | 2,303 (28·60)     |
| 30-34                                                  | 1,362 (28·95)           | 7,966 (17·66)      | 2,113 (26·24)     |
| 35-39                                                  | 573 (12·18)             | 3,730 (8·27)       | 1,387 (17·22)     |
| ≥40                                                    | 103 (2·19)              | 771 (1·71)         | 465 (5·77)        |
| <b>Parity<sup>a</sup></b>                              |                         |                    |                   |
| Nullipara                                              | 2,177 (46·27)           | 23,141 (51·30)     | 3,617 (44·91)     |
| Multipara                                              | 2,528 (53·73)           | 21,972 (48·70)     | 4,435 (55·07)     |
| <b>Medical risk<sup>b,c</sup></b>                      | 14 (0·30)               | 414 (0·92)         | 132 (1·64)        |
| <b>Prior obstetric risk<sup>b,d</sup></b>              | 124 (2·64)              | 1,669 (3·70)       | 478 (5·94)        |
| <b>Mental illness<sup>b,e</sup></b>                    | 1,020 (21·68)           | 5,146 (11·41)      | 610 (7·57)        |
| <b>Receiving social assistance<sup>b</sup></b>         | 310 (6·59)              | 5,833 (12·93)      | 814 (10·11)       |
| <b>Pre-pregnancy Body Mass Index (BMI)<sup>f</sup></b> |                         |                    |                   |
| Underweight                                            | 229 (4·87)              | 2,300 (5·10)       | 519 (6·44)        |
| Normal                                                 | 2,612 (55·52)           | 16,777 (37·19)     | 2,990 (37·13)     |
| Overweight                                             | 689 (14·64)             | 5,829 (12·92)      | 877 (10·89)       |
| Obese                                                  | 335 (7·12)              | 3,792 (8·41)       | 479 (5·95)        |
| Unknown                                                | 840 (17·85)             | 16,416 (36·39)     | 3,188 (39·59)     |
| <b>Smoking Status</b>                                  |                         |                    |                   |
| Never                                                  | 992 (21·08)             | 6,666 (14·78)      | 1,868 (23·20)     |
| Former                                                 | 690 (14·67)             | 5,028 (11·15)      | 434 (5·39)        |
| Current                                                | 471 (10·01)             | 9,910 (21·97)      | 800 (9·93)        |
| Unknown                                                | 2,552 (54·24)           | 23,510 (52·11)     | 4,951 (61·48)     |
| <b>Substance use in pregnancy<sup>b,g</sup></b>        | 179 (3·80)              | 3,273 (7·25)       | 302 (3·75)        |
| <b>Alcohol identified as a risk<sup>b</sup></b>        | 57 (1·21)               | 1,109 (2·46)       | 63 (0·78)         |
| <b>Utilization of prenatal care<sup>h</sup></b>        |                         |                    |                   |
| Intense                                                | 98 (2·08)               | 304 (0·67)         | 60 (0·75)         |
| Adequate                                               | 1,420 (30·18)           | 6,851 (15·19)      | 902 (11·20)       |
| Intermediate                                           | 1,927 (40·96)           | 19,929 (44·17)     | 2,601 (32·30)     |
| Inadequate                                             | 273 (5·80)              | 6,986 (15·49)      | 980 (12·17)       |
| Unknown                                                | 987 (20·98)             | 11,044 (24·48)     | 3,510 (43·59)     |
| <b>Antepartum morbidity<sup>b,i</sup></b>              | 349 (7·42)              | 6,843 (15·17)      | 1,955 (24·28)     |
| <b>Delivery year</b>                                   |                         |                    |                   |
| 2005                                                   | 307 (6·52)              | 5,772 (12·79)      | 955 (11·86)       |
| 2006                                                   | 437 (9·29)              | 6,028 (13·36)      | 1,002 (12·44)     |
| 2007                                                   | 471 (10·01)             | 6,133 (13·59)      | 1,074 (13·34)     |

|                                                                   |               |                |               |
|-------------------------------------------------------------------|---------------|----------------|---------------|
| 2008                                                              | 512 (10·88)   | 5,892 (13·06)  | 977 (12·13)   |
| 2009                                                              | 606 (12·88)   | 5,640 (12·50)  | 910 (11·30)   |
| 2010                                                              | 694 (14·75)   | 5,371 (11·91)  | 1,000 (12·42) |
| 2011                                                              | 796 (16·92)   | 5,337 (11·83)  | 1,014 (12·59) |
| 2012                                                              | 882 (18·75)   | 4,941 (10·95)  | 1,121 (13·92) |
| <b>Neighbourhood SEP<sup>j</sup></b>                              |               |                |               |
| High                                                              | 624 (13·26)   | 4,984 (11·05)  | 646 (8·02)    |
| Low/Medium                                                        | 4,081 (86·74) | 40,130 (88·95) | 7,407 (91·98) |
| <b>Local Health Area (LHA) Population Demographic<sup>k</sup></b> |               |                |               |
| Urban                                                             | 4,548 (96·66) | 42,489 (94·18) | 7,889 (97·96) |
| Rural                                                             | 145 (3·08)    | 2,576 (5·71)   | 145 (1·80)    |
| Unknown                                                           | 12 (0·26)     | 49 (0·11)      | 19 (0·24)     |
| <b>LHA Socioeconomic Rank<sup>l</sup></b>                         |               |                |               |
| High (Best)                                                       | 2,638 (56·07) | 13,287 (29·45) | 4,043 (50·20) |
| Medium                                                            | 1,472 (31·29) | 22,011 (48·79) | 3,197 (39·70) |
| Low                                                               | 582 (12·37)   | 9,710 (21·52)  | 739 (9·18)    |
| Unknown                                                           | 13 (0·28)     | 106 (0·23)     | 74 (0·92)     |
| <b>LHA Income Inequality Rank<sup>m</sup></b>                     |               |                |               |
| High (Worst)                                                      | 1,667 (35·43) | 10,635 (23·57) | 4,177 (51·87) |
| Medium                                                            | 2,326 (49·44) | 25,544 (56·62) | 3,311 (41·12) |
| Low                                                               | 699 (14·86)   | 8,841 (19·60)  | 530 (6·58)    |
| Unknown                                                           | 13 (0·28)     | 94 (0·21)      | 35 (0·43)     |
| <b>Northern Residence<sup>b,n</sup></b>                           |               |                |               |
|                                                                   | 136 (2·89)    | 6,032 (13·37)  | 291 (3·61)    |

All characteristics examined differed significantly by model of care ( $X^2$   $p < 0·0001$ )

<sup>a</sup> missing cases amount to 5 or less

<sup>b</sup> values represent cases classified as “Yes”, the remainder of the cases were classified as “No”, “Unknown”, or were undocumented

<sup>c</sup> included maternal disease of the respiratory or digestive system, and endocrine, nutritional, or metabolic disease

<sup>d</sup> included women with at least one of the following conditions in past pregnancy: infant with major congenital anomaly, neonatal death, stillbirth, or one preterm delivery

<sup>e</sup> included any of the following diagnoses prior to, or during the current pregnancy: anxiety disorder, depression, postpartum depression, bipolar disorder, other/unknown (including schizophrenic, mood, and psychotic disorders)

<sup>f</sup> classified according to Health Canada’s guidelines<sup>26</sup>

<sup>g</sup> heroin/opioids, cocaine, methadone, solvents, marijuana, or other/unknown drugs used at any time during pregnancy, prescription or other drug use identified as a risk at any time during pregnancy

<sup>h</sup> classifications based on Kotelchuck’s Adequacy of Prenatal Care Utilization Index<sup>27</sup>

<sup>i</sup> included pregnancy induced hypertension, gestational diabetes (whether or not insulin dependent), anemia, intrauterine growth restriction, viral disease, infection and parasitic disease, placenta previa without hemorrhage, polyhydramnios or oligohydramnios, antepartum hemorrhage  $\geq 20$  weeks, sexually transmitted infection or HIV, or premature separation of the placenta



1  
2  
3 <sup>j</sup> neighbourhood income quintiles were classified as low/medium (quintiles 1-4) vs. high  
4 (quintile 5)<sup>24</sup>

5 <sup>k</sup> rural LHAs had a population < 10,000 people

6 <sup>l</sup> calculated by BC Stats, based on a range of social determinants of health reflecting area-  
7 level economic and social processes, and policy decisions<sup>22</sup>

8 <sup>m</sup> calculated by BC Stats<sup>22</sup>

9 <sup>n</sup> at the time of delivery, normal residence in BC's Northern Health Authority  
10  
11  
12  
13  
14  
15  
16  
17  
18  
19  
20  
21  
22  
23  
24  
25  
26  
27  
28  
29  
30  
31  
32  
33  
34  
35  
36  
37  
38  
39  
40  
41  
42  
43  
44  
45  
46  
47  
48  
49  
50  
51  
52  
53  
54  
55  
56  
57  
58  
59  
60

For peer review only

## RESULTS

There were 4,705 midwifery, 45,114 GP, and 8,053 OB pregnancies included in the study (Figure 1). Both midwives' and OBs' patients were, on average, older than GPs' patients, more likely to be multiparous, non-smokers, and residing in urban areas (Table 1). In addition, midwifery and OB patients less frequently reported alcohol or substance use during pregnancy compared to GP patients. A higher proportion of GP and OB patients had moderate medical risk and prior obstetric risk than midwifery patients, though midwifery patients had higher prevalence of reported mental illness during or prior to pregnancy (Table 1). Midwife and GP patients had higher rates of overweight or obese BMI than OB patients. Midwives' patients also had higher prevalence of adequate attendance at prenatal care compared to physicians' patients.

Of all pregnancies in our study, 7.09% were SGA, 6.50% were PTB, and 3.32% were LBW (Table 2). On average there was a significant reduction in unadjusted odds of SGA for midwifery vs. GP patients (OR 0.67, 95% CI: 0.58 to 0.77) and midwifery vs. OB patients (OR 0.55, 95% CI: 0.47 to 0.64). GP vs. OB patients were also less likely to have a SGA infant (OR 0.81, 95% CI: 0.75 to 0.89). When controlling for maternal age, parity, pre-pregnancy BMI, infant sex, smoking status, substance use, mental illness, and LHA socioeconomic rank, women receiving antenatal care from midwives vs. GPs had lower odds of having a SGA infant (aOR 0.71, 95% CI: 0.62 to 0.82) (Table 2). Midwifery vs. GP patients also had lower adjusted odds of SGA birth (aOR 0.59, 95% CI: 0.50 to 0.69). GP antenatal care was likewise associated with lower adjusted odds of SGA birth compared to OB care (aOR 0.83, 95% CI: 0.76 to 0.91).

The unadjusted odds of PTB were lower for woman receiving antenatal care from midwives vs. GPs (OR 0.68, 95% CI: 0.59 to 0.79) and midwives vs. OBs (OR 0.49, 95% CI: 0.41 to 0.57).

1  
2  
3 GP vs. OB patients also had lower unadjusted odds of PTB (OR 0·71, 95% CI: 0·65 to 0·78).  
4  
5 When adjusting the PTB model for the same variables as the SGA model, as well as for medical  
6  
7 risk, prior obstetric risk, delivery year, receipt of social assistance, alcohol use, neighbourhood  
8  
9 SEP, LHA income inequality, and northern residence, odds of PTB remained statistically  
10  
11 significantly lower for midwifery vs. GP care (aOR 0·74, 95% CI: 0·63 to 0·86) and midwifery  
12  
13 vs. OB care (aOR 0·53, 95% CI: 0·45 to 0·62). On average, GP patients also had lower adjusted  
14  
15 odds of PTB compared to OB patients (aOR 0·72, 95% CI: 0·65 to 0·79).  
16  
17  
18  
19  
20

21 Women receiving antenatal midwifery care had lower unadjusted odds of LBW compared to  
22  
23 those in the care of GPs (OR 0·60, 95% CI: 0·49 to 0·74) or OBs (OR 0·39, 95% CI: 0·31 to  
24  
25 0·50). GP vs. OB patients also had lower unadjusted odds of LBW (OR 0·65, 95% CI: 0·58 to  
26  
27 0·73). After adjustment for maternal age, parity, prior obstetric risk, pre-pregnancy BMI, infant  
28  
29 sex, smoking status, and substance use, women in the care of midwives had lower odds of LBW  
30  
31 compared to GP (aOR 0·66, 95% CI: 0·53 to 0·82) or OB patients (aOR 0·43, 95% CI: 0·34 to  
32  
33 0·54). GP patients also had lower adjusted odds of LBW compared to OB patients (aOR 0·65,  
34  
35 95% CI: 0·58 to 0·74).  
36  
37  
38  
39  
40  
41

42 When testing for residual confounding by controlling for select antepartum morbidities the  
43  
44 associations between model of care and SGA, PTB, and LBW were attenuated but remained  
45  
46 statistically significant (see Appendix C).  
47  
48  
49  
50  
51  
52  
53  
54  
55  
56  
57  
58  
59  
60

**Table 2: Frequencies, proportions and adjusted odds ratios for small-for-gestational-age birth, preterm birth, and low birth weight by antenatal model of care, British Columbia, 2005-2012**

|                        | <b>MW</b><br>n= 4,705 | <b>GP</b><br>n= 45,114 | <b>OB</b><br>n= 8,053 | <b>MW vs. GP</b>   | <b>MW vs. OB</b>   | <b>GP vs. OB</b>   |
|------------------------|-----------------------|------------------------|-----------------------|--------------------|--------------------|--------------------|
|                        | <b>n(%)</b>           | <b>n(%)</b>            | <b>n(%)</b>           | <b>OR (95% CI)</b> | <b>OR (95% CI)</b> | <b>OR (95% CI)</b> |
| <b>SGA<sup>a</sup></b> | 227/4,695 (4.83)      | 3,179/45,002 (7.06)    | 689/ 8,025 (8.59)     | 0.71 (0.62-0.82)   | 0.59 (0.50-0.69)   | 0.83 (0.76-0.91)   |
| <b>PTB<sup>b</sup></b> | 207/4,702 (4.40)      | 2,848/45,028 (6.32)    | 698/8,033 (8.69)      | 0.74 (0.63-0.86)   | 0.53 (0.45-0.62)   | 0.72 (0.65-0.79)   |
| <b>LBW<sup>c</sup></b> | 91/4,704 (1.93)       | 1,438/45,091 (3.19)    | 393/8,046 (4.88)      | 0.66 (0.53-0.82)   | 0.43 (0.34-0.54)   | 0.65 (0.58-0.74)   |

All models adjusted for maternal age, parity, pre-pregnancy BMI, infant sex, smoking status and substance use.

<sup>a</sup>Model also adjusted for mental illness, and LHA socioeconomic rank. Odds ratios based on 4,095 births with SGA and 57,722 total births with no missing information for this analysis.

<sup>b</sup>Model also adjusted for medical risk, prior obstetric risk, delivery year, receipt of social assistance, alcohol use, mental illness, neighbourhood SEP, LHA socioeconomic rank, LHA income inequality, and northern residence. Odds ratios based on 3,753 PTB births and 57,763 total births with no missing information for this analysis.

<sup>c</sup>Model also adjusted for prior obstetric risk. Odds ratios based on 1,922 births with LBW and 57,841 total births with no missing information for this analysis.

## DISCUSSION

### Strengths and Weaknesses

Our study demonstrated a statistically significant reduction in odds of SGA, PTB, and LBW for infants born to women of low SEP receiving antenatal midwifery vs. physician-led care in BC, Canada. This study represented the majority of pregnant, low SEP women in BC during the study period, had adequate study power, and tested a wide range of individual and area-level potential confounders. In addition, GEE logistic regression modelling allowed us to account for correlation in outcomes at a family and community level, a more rigorous modelling approach than the methods used in previous studies. As this was a large, population based study, findings are generalizable for other high resource countries which offer similar, publicly funded midwifery services.

Our study was limited by its observational design. Until more women are willing to be randomly assigned to midwifery vs. physician-led care, evidence for causality will need to be established by repeated observational studies with representative samples over time. This study was also limited by a lack of data on the use of universal, objective screening tools for alcohol/substance use and mental health conditions, and it did not include measures of severity. In addition, there was no data available on race/ethnicity, language, or culture, and we were not able to assess outcomes among women who were Status Indians.

Women in the study self-selected their care provider, therefore it is possible that those with higher perinatal risk (on the low to moderate risk spectrum) chose obstetrician care, creating a higher risk OB cohort. However, we did control for a wide range of known medical and obstetric

1  
2  
3 risk factors when indicated, and when we controlled for antepartum morbidity the main  
4  
5 associations remained significant. Overall the sample had a very low proportion of medical risk  
6  
7 (0.97%) or prior obstetric risk patients (3.92%). Lastly, because women utilizing midwifery care  
8  
9 in BC may need to be pro-active in ascertaining services early in pregnancy due to high demand,  
10  
11 it is plausible that women who secured midwifery care were more knowledgeable about the  
12  
13 health care system, more invested in their health, or had greater ability to pursue preferred health  
14  
15 care services. These skills, attitudes, and values could have systematically differed between  
16  
17 cohorts. Nonetheless, we did control for smoking, alcohol, and pre-pregnancy BMI, which may  
18  
19 reflect women's attitudes, beliefs, and values during pregnancy, and this may have minimized  
20  
21 self-selection bias.  
22  
23  
24  
25  
26  
27

### 28 **Results in comparison with other studies**

29  
30 Observational studies with non-representative samples (a freestanding birth centre serving  
31  
32 primarily low income African American women,<sup>3</sup> and an Australian, hospital-based cohort study  
33  
34 restricted to women  $\leq 21$  years of age<sup>28</sup>) have reported similar findings. Likewise, in a  
35  
36 randomized controlled trial for low SEP women who had high risk of delivering LBW infants,  
37  
38 odds of VLBW was significantly lower among a subgroup of African American nurse-midwifery  
39  
40 patients vs. OB patients (OR 0.35, 95% CI: 0.1 to 0.9).<sup>5</sup> However, there was no difference in  
41  
42 odds of LBW or VLBW by practitioner-type in the overall sample. Additionally, in a  
43  
44 retrospective cohort study<sup>4</sup> comparing outcomes of nurse-midwifery care to usual care for  
45  
46 Medicaid recipients or uninsured patients residing in Westchester County, New York, nurse-  
47  
48 midwifery patients had significantly lower risk of LBW and VLBW. Yet, in this study there was  
49  
50 no adjustment for pre-existing health complications or perinatal risk which may have introduced  
51  
52 bias.  
53  
54  
55  
56  
57

1  
2  
3  
4  
5 Five other midwifery/physician studies involving women of low SEP have reported no  
6 significant differences in SGA or PTB by provider-type.<sup>6-10</sup> Almost all studies were limited by  
7 failure to control for pre-existing medical/obstetric risk<sup>6</sup> or inadequate power to detect clinically  
8 important differences between cohorts.<sup>6,8-10</sup> In one adequately powered, prospective cohort study  
9 (n=2,957)<sup>7</sup> comparing collaborative birth center care provided by midwives (with OB referral for  
10 complications) vs. OB or OB resident care, no statistically significant differences were reported.  
11 This study, however, was conducted in the U.S. and comprised of 77% Hispanic women.  
12  
13  
14  
15  
16  
17  
18  
19  
20  
21  
22  
23

### 24 **Experience of antenatal care across models**

25  
26 In our study, adequate antenatal care utilization may have been a mechanism linking midwifery  
27 care to reduced odds of SGA, PTB, and LBW. Midwives' patients had 2·3 times greater odds of  
28 adequately utilizing antenatal care compared to GPs' patients and 2·5 times greater odds  
29 compared to OBs' patients. As revealed in a 2009 qualitative meta-synthesis, antenatal care use  
30 by marginalized women is associated with their perception of their clinician's trustworthiness,  
31 cultural sensitivity, and respect for life experience.<sup>29</sup> Adequate use of antenatal care has been  
32 shown to protect against PTB, stillbirth, and neonatal and infant death.<sup>30</sup> If midwifery's  
33 relationship-based model of care encouraged antenatal care uptake, it may have indirectly  
34 affected prevalence of infant morbidity for women of low SEP.  
35  
36  
37  
38  
39  
40  
41  
42  
43  
44  
45  
46  
47  
48

49 Lack of patient trust may also have inhibited patient disclosure of compromising health  
50 conditions. Midwifery patients had higher prevalence of mental illness overall and for each  
51 category (i.e. depression, anxiety, bipolar disorder) compared to GP or OB patients. Midwives'  
52  
53  
54  
55  
56  
57  
58  
59  
60

1  
2  
3 patients had a 2·2 fold increase in odds of documented mental illness, compared to GPs' patients  
4  
5 and a 3·4 fold increase compared to OBs' patients. In our study, prevalence of depression for  
6  
7 midwifery patients approximated that reported in the literature. In a review of 16 antenatal and  
8  
9 postnatal depression studies (n=35,419) which were published between 2000 and 2016, and  
10  
11 mainly conducted in western Europe, researchers reported a mean antenatal depression  
12  
13 prevalence of 17·2%.<sup>31</sup> In our study, data on depression was collected between 2008 to 2012.  
14  
15 The proportion of midwifery patients with depression prior to or during pregnancy was 18·8% in  
16  
17 contrast to 12·8% for GP patients and 7·4% for OB patients.  
18  
19  
20  
21  
22  
23

24 Greater disclosure of sensitive information to midwives providing caseload midwifery care has  
25  
26 been noted in other studies. In the Australian midwifery cohort study previously cited, young  
27  
28 women receiving caseload midwifery care were significantly ( $p < 0·01$ ) more likely to report a  
29  
30 history of mental illness, illicit drug use, and involvement with the Department of Child Safety  
31  
32 than those receiving standard maternity care.<sup>28</sup> Likewise, in a small retrospective cohort study  
33  
34 (n=194) conducted in the U.K. researchers examined birth outcomes by caseload midwifery care  
35  
36 to standard maternity care for women with vulnerabilities (i.e. experiencing “domestic violence,  
37  
38 homelessness, mental health issues, substance and/or alcohol abuse”).<sup>32, p411</sup> Women in the  
39  
40 caseload midwifery cohort were statistically significantly more likely to receive a referral to  
41  
42 psychiatric care and/or domestic violence or other support services which may be indicative of  
43  
44 higher rates of disclosure among midwifery patients. Of note, in both of these studies patients in  
45  
46 the caseload midwifery cohorts had either a higher mean number of antenatal appointments<sup>32</sup> or a  
47  
48 lower percentage of inadequate prenatal utilization of care ( $< 5$  visits).<sup>28</sup> This likely increased  
49  
50  
51  
52  
53  
54  
55  
56  
57  
58  
59  
60



1  
2  
3 clinician-patient familiarity which is a component of trust shown to influence domestic abuse  
4 disclosure.<sup>33</sup>  
5  
6  
7  
8  
9

10 In our study, odds of antepartum morbidity were lower for midwives' vs. physicians' patients  
11 providing another clue as to the mechanisms linking midwifery care to a reduction in prevalence  
12 of SGA, PTB, and LBW. Midwifery vs. GP patients had 59% lower odds of antepartum  
13 morbidity (see definition in Table 1), and midwifery vs. OB patients had 74% lower odds. When  
14 controlling for antepartum morbidity odds of SGA, PTB, and LBW by model of care were  
15 attenuated but remained statistically significant (Appendix C). This suggests that even if  
16 antepartum morbidity were related to baseline differences in health status (selection bias), this  
17 could only partially explain the lower odds of adverse infant birth outcomes for women in the  
18 care of midwives vs. physicians. It is plausible longer appointment times and a holistic approach  
19 to care may have made it possible for midwives to identify pre-morbid conditions (i.e. borderline  
20 hypertension or anemia) earlier in pregnancy and implement preventative measures before  
21 conditions progressed to antepartum morbidity.  
22  
23  
24  
25  
26  
27  
28  
29  
30  
31  
32  
33  
34  
35  
36  
37  
38  
39

#### 40 **Implications**

41  
42 Study findings indicate a need for policy which supports midwifery availability and accessibility  
43 for women of low SEP. Future studies are needed to identify which attributes of midwifery care  
44 influence infant birth outcomes for women of low SEP and the mechanisms (i.e. physiological,  
45 psychological and/or behavioural) underlying this association. In our study midwifery care was  
46 associated with the lowest odds of adverse birth outcomes followed by GP, then OB care.  
47  
48  
49  
50  
51  
52

53 Antenatal midwifery and GP practice may have greater similarity (with respect to continuity in  
54  
55  
56  
57

1  
2  
3 care, provision of emotional support, and volume of medical intervention) than midwifery to OB  
4 care. Therefore, it could be useful to analyze characteristics of practice common to midwifery  
5 and GP care but which differ from OB practice.  
6  
7  
8  
9

## 10 11 12 **CONCLUSION**

13  
14 Our study demonstrated lower odds of SGA birth, PTB, and LBW for women of low SEP in BC  
15 who received antenatal midwifery vs. physician-led care. As this was a large, population based  
16 study with adequate study power and control for confounders, our results are generalizable to  
17 other high resource countries offering similar midwifery services. Results of this study support  
18 the development of policy to ensure antenatal midwifery care is available and accessible for  
19 women of low SEP. Further research is needed to determine the mechanisms linking antenatal  
20 midwifery care to better birth outcomes among women of low SEP.  
21  
22  
23  
24  
25  
26  
27  
28  
29  
30  
31  
32

## 33 **ACKNOWLEDGMENTS**

34 We thank Celeste Bickford for assistance in linking the Research Extracts and data preparation.  
35 DNM was supported by an Arthur Smyth Scholarship from the College of Medicine, and a PhD  
36 Scholarship from the Department of Community Health and Epidemiology, University of  
37 Saskatchewan, SK, Canada. PAJ is supported by a Senior Scholar salary award from the BC  
38 Children's Hospital Research Institute, Vancouver, BC, Canada.  
39  
40  
41  
42  
43  
44  
45  
46  
47  
48  
49

## 50 **Disclaimers**

51  
52  
53 All inferences, opinions, and conclusions drawn in this study are those of the authors, and do not  
54 reflect the opinions or policies of the Data Stewards. Authors have no competing interests to  
55  
56  
57

1  
2  
3 declare. Funding sources had no involvement in the study; the authors are independent of all  
4  
5 funders.  
6  
7  
8  
9

## 10 **Contributors**

11  
12  
13 DNM designed the study, conducted the statistical analyses, interpreted the results, drafted the  
14  
15 initial manuscript, and revised subsequent drafts. NM and PAJ designed the study, reviewed the  
16  
17 statistical analyses, interpreted the results, and reviewed and revised the manuscript. SV, MM  
18  
19 and DM contributed to study design and clinical interpretation, and reviewed and revised the  
20  
21 manuscript. UT contributed to interpretation, and reviewed and revised the manuscript. All  
22  
23 authors approved the final manuscript.  
24  
25  
26  
27  
28  
29

## 30 **Data Sharing**

31  
32 No additional data available.  
33  
34  
35  
36

## 37 **Figure Legend**

38  
39 **Figure 1: Eligibility flow chart** Total number of pregnancies meeting inclusion/exclusion  
40  
41 criteria by cohort.  
42  
43  
44  
45  
46  
47  
48  
49  
50  
51  
52  
53  
54  
55  
56  
57  
58  
59  
60

## References

1. Blumenshine P, Egerter S, Barclay CJ, Cubbin C, Braveman PA. Socioeconomic disparities in adverse birth outcomes: a systematic review. *Am J Prev Med* 2010;39(3):263-72.
2. McRae DN, Muhajarine N, Stoll K, et al. Is model of care associated with infant birth outcomes among vulnerable women? A scoping review of midwifery-led versus physician-led care. *Soc Sci Med-Pop Health* 2016;2:182-93.
3. Benatar S, Garrett AB, Howell E, Palmer A. Midwifery care at a freestanding birth center: a safe and effective alternative to conventional maternity care. *Health Serv Res* 2013;48(5):1750-68.
4. Visintainer P, Uman J, Horgan D, Ibald A, Verma U, Tejani N. Reduced risk of low weight births among indigent women receiving care from nurse-midwives. *J Epidemiol Community Health* 2000;54(3):233-8.
5. Heins HC, Nance NW, McCarthy BJ, Efird CM. A randomized trial of nurse-midwifery prenatal care to reduce low birth weight. *Obstet Gynecol* 1990;75(3 Pt 1):341-5.
6. Simonet F, Wilkins R, Labranche E, et al. Primary birthing attendants and birth outcomes in remote Inuit communities--a natural "experiment" in Nunavik, Canada. *J Epidemiol Community Health* 2009;63(7):546-51.
7. Jackson DJ, Lang JM, Swartz WH, et al. Outcomes, safety, and resource utilization in a collaborative care birth center program compared with traditional physician-based perinatal care. *Am J Public Health* 2003;93(6):999-1006.
8. Cragin LE. Comparisons of care by nurse-midwives and obstetricians: Birth outcomes for moderate risk women [Ph.D. thesis]. Ann Arbor: University of California, San Francisco 2002.

- 1  
2  
3 9. Fischler NR, Harvey SM. Setting and provider of prenatal care: association with  
4 pregnancy outcomes among low-income women. *Health Care Women Int* 1995;16(4):309-21.  
5  
6
- 7  
8 10. McLaughlin FJ, Altemeier WA, Christensen MJ, Sherrod KB, Dietrich MS, Stern DT.  
9  
10 Randomized trial of comprehensive prenatal care for low-income women: effect on infant birth  
11 weight. *Pediatrics* 1992;89(1):128-32.  
12  
13
- 14  
15 11. College of Midwives of British Columbia (CMBC). Midwifery Model of Practice: *CMBC*  
16 2013 [cited 2017 April 22]. Available from: [http://www.cmbc.bc.ca/pdf.shtml?Registrants-](http://www.cmbc.bc.ca/pdf.shtml?Registrants-Handbook-11-05-Midwifery-Model-of-Practice)  
17  
18 [Handbook-11-05-Midwifery-Model-of-Practice](http://www.cmbc.bc.ca/pdf.shtml?Registrants-Handbook-11-05-Midwifery-Model-of-Practice).  
19  
20
- 21  
22 12. Vedam S, Stoll K, Martin K, et al. The Mother's Autonomy in Decision Making  
23 (MADM) scale: patient-led development and psychometric testing of a new instrument to  
24 evaluate experience of maternity care. *PLoS One* 2017;12(2).  
25  
26  
27
- 28  
29 13. College of Midwives of British Columbia (CMBC). Indications for Discussion,  
30 Consultation and Transfer of Care: *CMBC* 2014 [cited 2017 May 2]. Available from:  
31  
32 [http://www.cmbc.bc.ca/Registrants-Handbook-12-01-Indications-for-Discussion-Consultation-](http://www.cmbc.bc.ca/Registrants-Handbook-12-01-Indications-for-Discussion-Consultation-and-Transfer-of-Care.pdf)  
33  
34 [and-Transfer-of-Care.pdf](http://www.cmbc.bc.ca/Registrants-Handbook-12-01-Indications-for-Discussion-Consultation-and-Transfer-of-Care.pdf).  
35  
36
- 37  
38 14. Perinatal Services BC [creator] (2016): British Columbia Perinatal Data Registry.  
39 Population Data BC [publisher]. Data Extract. PSBC 2014 [cited 2016 April 6]. Available from:  
40  
41 <http://www.perinataleservicesbc.ca/health-professionals/data-surveillance/perinatal-data-registry>.  
42  
43
- 44  
45 15. British Columbia Perinatal Health Program. British Columbia perinatal database registry  
46 annual report. Vancouver, BC: Perinatal Services BC 2007 [cited 2017 Jan 17]. Available from:  
47  
48 [http://www.perinataleservicesbc.ca/Documents/Data-](http://www.perinataleservicesbc.ca/Documents/Data-Surveillance/Reports/SurveillanceAnnualReport2007.pdf)  
49  
50 [Surveillance/Reports/SurveillanceAnnualReport2007.pdf](http://www.perinataleservicesbc.ca/Documents/Data-Surveillance/Reports/SurveillanceAnnualReport2007.pdf).  
51  
52  
53  
54  
55  
56  
57  
58  
59  
60

- 1  
2  
3 16. Kierans W, Kramer M, Wilkins R, et al. Charting birth outcome in British Columbia:  
4 determinants of optimal health and ultimate risk--an expansion and update. Vancouver, BC:  
5 British Columbia Vital Statistics Agency 2008 [cited 2017 Feb 16]. Available from:  
6  
7 [http://www.perinataleservicesbc.ca/Documents/Resources/HealthPromotion/BirthCharts/Charting](http://www.perinataleservicesbc.ca/Documents/Resources/HealthPromotion/BirthCharts/ChartingBirthOutcomeReport.pdf)  
8 [BirthOutcomeReport.pdf](http://www.perinataleservicesbc.ca/Documents/Resources/HealthPromotion/BirthCharts/ChartingBirthOutcomeReport.pdf).  
9  
10  
11  
12  
13  
14 17. British Columbia Ministry of Health [creator] (2016): Medical Services Plan (MSP)  
15 Payment Information File. V2. Population Data BC [publisher]. Data Extract. MOH 2014 [cited  
16  
17 2017 April 6]. Available from: <http://www.popdata.bc.ca/data>.  
18  
19  
20  
21 18. Statistics Canada. Low income cut-offs for 2008 and low income measures for 2007  
22  
23 Ottawa, ON: Statistics Canada 2009 [cited 2017 Sept 21]. Available from:  
24  
25 <http://www.statcan.gc.ca/pub/75f0002m/75f0002m2009002-eng.pdf>.  
26  
27  
28 19. Canadian Institute of Health Information (CIHI). Too early, too small: a profile of small  
29  
30 babies across Canada. Ottawa, ON: CIHI 2009 [cited 2017 Sept 24]. Available from:  
31  
32 [https://secure.cihi.ca/free\\_products/too\\_early\\_too\\_small\\_en.pdf](https://secure.cihi.ca/free_products/too_early_too_small_en.pdf).  
33  
34  
35 20. Government of British Columbia. Information release: freedom of information request -  
36  
37 HTH-2015-50271. Government of BC 2015 [cited 2015 Dec 12]. Available from:  
38  
39 [http://www.openinfo.gov.bc.ca/ibc/search/detail.page?config=ibc&P110=recorduid:HTH-2015-](http://www.openinfo.gov.bc.ca/ibc/search/detail.page?config=ibc&P110=recorduid:HTH-2015-50271&title=FOI%20Request%20-%20HTH-2015-50271)  
40 [50271&title=FOI%20Request%20-%20HTH-2015-50271](http://www.openinfo.gov.bc.ca/ibc/search/detail.page?config=ibc&P110=recorduid:HTH-2015-50271&title=FOI%20Request%20-%20HTH-2015-50271).  
41  
42  
43  
44 21. SAS Institute Inc. SAS/STAT® 14.3 User's Guide: The GEE procedure Cary, NC: SAS  
45  
46 Institute Inc. 2017 [cited 2016 Dec 1]. Available from:  
47  
48 <http://support.sas.com/documentation/onlinedoc/stat/143/gee.pdf>.  
49  
50  
51  
52  
53  
54  
55  
56  
57  
58  
59  
60

- 1  
2  
3 22. BC Stats. Socio-economic indices: Local Health Area Indices: Government of BC 2013  
4  
5 [cited 2017 Dec 12]. Available from: <https://www2.gov.bc.ca/gov/content/data/statistics/people->  
6  
7 [population-community/socio-economic-profiles-indices/socio-economic-indices](https://www2.gov.bc.ca/gov/content/data/statistics/people-population-community/socio-economic-profiles-indices/socio-economic-indices).  
8  
9
- 10 23. Meng G, Thompson ME, Hall BG. Pathways of neighbourhood-level socio-economic  
11  
12 determinants of adverse birth outcomes. *Int J Health Geogr* 2013;12(32).  
13
- 14 24. British Columbia Ministry of Health [creator] (2015): Consolidation File (MSP  
15  
16 Registration & Premium Billing). Population Data BC [publisher]. Data Extract. MOH 2014  
17  
18 [cited 2017 April 6]. Available from: <http://www.popdata.bc.ca/data>.  
19  
20
- 21 25. Hosmer DW, Lemeshow S, Sturdivant RX. Applied logistic regression. Hoboken, N.J.:  
22  
23 Wiley 2013.  
24  
25
- 26 26. Health Canada. Prenatal nutrition guidelines for health professionals: gestational weight  
27  
28 gain. Ottawa, ON: Health Canada 2014 [cited 2017 Nov 9]. Available from: [http://www.hc-](http://www.hc-sc.gc.ca/fn-an/nutrition/prenatal/ewba-mbsa-eng.php#t2)  
29  
30 [sc.gc.ca/fn-an/nutrition/prenatal/ewba-mbsa-eng.php#t2](http://www.hc-sc.gc.ca/fn-an/nutrition/prenatal/ewba-mbsa-eng.php#t2).  
31  
32
- 33 27. Kotelchuck M. An evaluation of the Kessner Adequacy of Prenatal Care Index and a  
34  
35 proposed Adequacy of Prenatal Care Utilization Index. *Am J of Pub Health* 1994;84(9):1414-20.  
36  
37
- 38 28. Allen J, Gibbons K, Beckmann M, Tracy M, Stapleton H, Kildea S. Does model of  
39  
40 maternity care make a difference to birth outcomes for young women? A retrospective cohort  
41  
42 study. *Int J Nurs Stud* 2015;52(8):1332-42.  
43  
44
- 45 29. Downe S, Finlayson K, Walsh D, Lavender T. 'Weighing up and balancing out': a meta-  
46  
47 synthesis of barriers to antenatal care for marginalised women in high-income countries. *BJOG*  
48  
49 2009;116(4):518-29.  
50  
51  
52  
53  
54  
55  
56  
57  
58  
59  
60

- 1  
2  
3 30. Partridge S, Balayla J, Holcroft CA, Abenhaim HA. Inadequate prenatal care utilization  
4 and risks of infant mortality and poor birth outcome: a retrospective analysis of 28,729,765 U.S.  
5 deliveries over 8 years. *Am J Perinatol* 2012;29(10):787-93.  
6  
7  
8  
9  
10 31. Underwood L, Waldie K, D'Souza S, Peterson ER, Morton S. A review of longitudinal  
11 studies on antenatal and postnatal depression. *Arch Womens Ment Health* 2016;19(5):711–20.  
12  
13  
14 32. Rayment-Jones H, Murrells T, Sandall J. An investigation of the relationship between the  
15 caseload model of midwifery for socially disadvantaged women and childbirth outcomes using  
16 routine data--a retrospective, observational study. *Midwifery* 2015;31(4):409-17.  
17  
18  
19  
20  
21 33. Liebschutz J, Battaglia T, Finley E, Averbuch T. Disclosing intimate partner violence to  
22 health care clinicians—what a difference the setting makes: a qualitative study. *BMC Public*  
23  
24  
25  
26 *Health* 2008;8:229.  
27  
28  
29  
30  
31  
32  
33  
34  
35  
36  
37  
38  
39  
40  
41  
42  
43  
44  
45  
46  
47  
48  
49  
50  
51  
52  
53  
54  
55  
56  
57  
58  
59  
60



1  
2  
3  
4  
5  
6  
7  
8  
9  
10  
11  
12  
13  
14  
15  
16  
17  
18  
19  
20  
21  
22  
23  
24  
25  
26  
27  
28  
29  
30  
31  
32  
33  
34  
35  
36  
37  
38  
39  
40  
41  
42  
43  
44  
45  
46  
47  
48  
49  
50  
51  
52  
53  
54  
55  
56  
57  
58  
59  
60

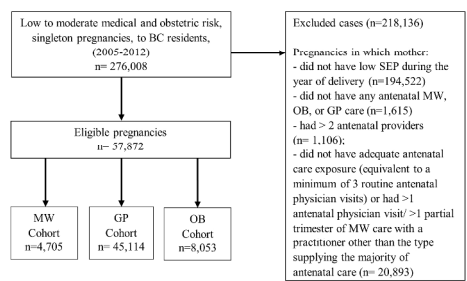

338x190mm (300 x 300 DPI)

Review only

1  
2  
3  
4  
5 **APPENDIX A: Inclusion/exclusion variables and ICD 10-CA codes**  
6  
7

8  
9

| Variables                                                                                                                    | Available in the PDR Checklist and/or as ICD 10-CA Codes                                                                                                                                                                                                                                                                                                                                                                                                                                                                                                      |
|------------------------------------------------------------------------------------------------------------------------------|---------------------------------------------------------------------------------------------------------------------------------------------------------------------------------------------------------------------------------------------------------------------------------------------------------------------------------------------------------------------------------------------------------------------------------------------------------------------------------------------------------------------------------------------------------------|
| <b>BC Health Service Delivery Area (resident)</b>                                                                            | Grouped into the following categories: <ul style="list-style-type: none"> <li>• BC Resident</li> <li>• All other categories (excluded)</li> </ul>                                                                                                                                                                                                                                                                                                                                                                                                             |
| <b>Number of births</b>                                                                                                      | Grouped into the following categories: <ul style="list-style-type: none"> <li>• Singleton</li> <li>• All other categories (excluded)</li> </ul>                                                                                                                                                                                                                                                                                                                                                                                                               |
| <b>Maternal diseases of the circulatory system and blood/blood forming organs</b>                                            | Codes beginning with:<br>O99.1 Other disease of the blood and blood-forming organs and certain disorders involving the immune mechanism complicating pregnancy<br>O99.4 Disease of the circulatory system complicating pregnancy<br>O99.8 Other specified disease and conditions complicating pregnancy, childbirth and the puerperium                                                                                                                                                                                                                        |
| <b>Pre-existing hypertension complicating pregnancy, hypertensive heart disease, hypertension secondary to renal disease</b> | Codes beginning with:<br>O10.1 Pre-existing hypertensive heart disease complicating pregnancy, childbirth, and the puerperium<br>O10.2 Pre-existing hypertensive renal disease complicating pregnancy, childbirth and the puerperium<br>O10.3 Pre-existing hypertensive heart and renal disease complicating pregnancy, childbirth and the puerperium<br>O10.4 Pre-existing secondary hypertension complicating pregnancy, childbirth and the puerperium<br>O10.9 Unspecified pre-existing hypertension complicating pregnancy, childbirth and the puerperium |
| <b>Antihypertensive drugs, hypertensive chronic renal disease, hypertension due to other causes</b>                          | Grouped into the following categories: <ul style="list-style-type: none"> <li>• Yes (excluded)</li> <li>• No</li> </ul>                                                                                                                                                                                                                                                                                                                                                                                                                                       |
| <b>Diabetes mellitus (insulin dependent), diabetes mellitus (non-insulin dependent)</b>                                      | Grouped into the following categories: <ul style="list-style-type: none"> <li>• Yes (excluded)</li> <li>• No</li> </ul> Codes beginning with:<br>O24.5 Pre-existing type 1 diabetes mellitus in pregnancy<br>O24.6 Pre-existing type 2 diabetes mellitus in pregnancy<br>O24.7 Pre-existing diabetes mellitus of other or unspecified type in pregnancy                                                                                                                                                                                                       |

10  
11  
12  
13  
14  
15  
16  
17  
18  
19  
20  
21  
22  
23  
24  
25  
26  
27  
28  
29  
30  
31  
32  
33  
34  
35  
36  
37  
38  
39  
40  
41  
42  
43  
44  
45  
46  
47  
48  
49  
50  
51  
52  
53  
54  
55  
56  
57  
58  
59  
60

|                                                                                      |                                                                                                                                                                                                                                                 |
|--------------------------------------------------------------------------------------|-------------------------------------------------------------------------------------------------------------------------------------------------------------------------------------------------------------------------------------------------|
| <b>Liver disorders</b>                                                               | Codes beginning with:<br>O26.6 Liver disorders in pregnancy, childbirth and the puerperium                                                                                                                                                      |
| <b>Tuberculosis, malaria</b>                                                         | Codes beginning with:<br>O98.0 Tuberculosis complicating pregnancy, childbirth and the puerperium<br>O98.6 Protozoal diseases complicating pregnancy, childbirth and the puerperium                                                             |
| <b>Number of previous pre-term deliveries</b>                                        | Grouped into the following categories: <ul style="list-style-type: none"> <li>• <math>\leq 1</math></li> <li>• <math>&gt;1</math> (excluded)</li> </ul>                                                                                         |
| <b>Previous cesarean deliveries</b>                                                  | Grouped into the following categories: <ul style="list-style-type: none"> <li>• <math>\leq 2</math></li> <li>• <math>&gt;2</math> (excluded)</li> </ul>                                                                                         |
| <b>Number of spontaneous abortions</b>                                               | Grouped into the following categories: <ul style="list-style-type: none"> <li>• <math>\leq 2</math></li> <li>• <math>&gt;2</math> (excluded)</li> </ul>                                                                                         |
| <b>Pre-eclampsia, eclampsia, or either superimposed on pre-existing hypertension</b> | Codes beginning with:<br>O11 Pre-existing hypertensive disorder with superimposed proteinuria<br>O14 Gestational hypertension with significant proteinuria<br>O15 Eclampsia<br>O16 Unspecified maternal hypertension                            |
| <b>Hemorrhage from placenta previa</b>                                               | Codes beginning with:<br>O44.1 Placenta praevia with haemorrhage                                                                                                                                                                                |
| <b>Rh immunoglobulin given or isoimmunization</b>                                    | Grouped into the following categories: <ul style="list-style-type: none"> <li>• Yes (excluded)</li> <li>• No</li> </ul> Codes beginning with:<br>O36.0 Maternal care for rhesus isoimmunization<br>O36.1 Maternal care of other isoimmunization |
| <b>Incompetent cervix</b>                                                            | Codes beginning with:<br>O34.3 Maternal care for cervical incompetence                                                                                                                                                                          |
| <b>Severe hyperemesis</b>                                                            | O21.1 Hyperemesis gravidarum with metabolic disturbance                                                                                                                                                                                         |
| <b>Maternal age</b>                                                                  | Grouped into the following categories: <ul style="list-style-type: none"> <li>• <math>\geq 14</math> years</li> <li>• <math>&lt; 14</math> years (excluded)</li> </ul>                                                                          |
| <b>Delivery date/Infant birth date</b>                                               | Grouped into the following categories: <ul style="list-style-type: none"> <li>• 1 Jan. 2005 to 31 Dec. 2012</li> <li>• All other categories (excluded)</li> </ul>                                                                               |
| <b>Variables</b>                                                                     | <b>Codes available in the MSP Payment Information File</b>                                                                                                                                                                                      |
| <b>General practitioner routine antenatal visit</b>                                  | Claim specialty code "General Practice" and fee item code: <ul style="list-style-type: none"> <li>• 14090 prenatal visit complete exam or</li> </ul>                                                                                            |

|                                                    |                                                                                                                                                                                                                                                                                                                                                                                                                                                                                                                                                                                                                                                                                  |
|----------------------------------------------------|----------------------------------------------------------------------------------------------------------------------------------------------------------------------------------------------------------------------------------------------------------------------------------------------------------------------------------------------------------------------------------------------------------------------------------------------------------------------------------------------------------------------------------------------------------------------------------------------------------------------------------------------------------------------------------|
|                                                    | <ul style="list-style-type: none"> <li>• 14091 prenatal visit subsequent exam or</li> <li>• 04717 prenatal office visit complex obstetrical patient</li> </ul>                                                                                                                                                                                                                                                                                                                                                                                                                                                                                                                   |
| <b>Obstetrician routine antenatal visit</b>        | <p>Claim specialty code “Obstetrician” and fee item code:</p> <ul style="list-style-type: none"> <li>• 14090 prenatal visit complete exam or</li> <li>• 14091 prenatal visit subsequent exam or</li> <li>• 04717 prenatal office visit complex obstetrical patient</li> </ul>                                                                                                                                                                                                                                                                                                                                                                                                    |
| <b>Full or partial trimester of midwifery care</b> | <p>Fee item code:</p> <ul style="list-style-type: none"> <li>• 36010 midwife phase 1 (1st trimester) total care</li> <li>• 36014 midwife phase 1 (1st trimester) trans. to other 40%</li> <li>• 36016 midwife phase 1 (1st trimester) trans. to other 60%</li> <li>• 36020 midwife phase 2 (2nd trimester) total care</li> <li>• 36024 midwife phase 2 (2nd trimester) trans. to other 40%</li> <li>• 36026 midwife phase 2 (2nd trimester) trans. to other 60%</li> <li>• 36030 midwife phase 3 (3rd trimester) total care</li> <li>• 36034 midwife phase 3 (3rd trimester) trans. to other 40%</li> <li>• 36036 midwife Phase 3 (3rd trimester) trans. to other 60%</li> </ul> |
| <b>MSP regular premium subsidy assistance</b>      | <p>Subsidy code:</p> <ul style="list-style-type: none"> <li>• A (100%), B (80%), F (60%), G (40%), H (100% paid by social services)</li> </ul>                                                                                                                                                                                                                                                                                                                                                                                                                                                                                                                                   |

1  
2  
3 **APPENDIX B: Covariate description, data source, and ICD 10-CA codes**  
4  
5  
6

7  
8  
9  
10  
11  
12  
13  
14  
15  
16  
17  
18  
19  
20  
21  
22  
23  
24  
25  
26  
27  
28  
29  
30  
31  
32  
33  
34  
35  
36  
37  
38  
39  
40  
41  
42  
43  
44  
45  
46  
47  
48  
49  
50  
51  
52  
53  
54  
55  
56  
57  
58  
59  
60

| Variable                          | Description                                                                                                                                                 | PDR Checklist or ICD 10-CA Codes                                                                                                                                                                                                                                                                          | Data Source |
|-----------------------------------|-------------------------------------------------------------------------------------------------------------------------------------------------------------|-----------------------------------------------------------------------------------------------------------------------------------------------------------------------------------------------------------------------------------------------------------------------------------------------------------|-------------|
| <b>Maternal age</b>               | Age at date of delivery                                                                                                                                     | Grouped into the following categories: <ul style="list-style-type: none"> <li>• 14-19</li> <li>• 20-24</li> <li>• 25-29</li> <li>• 30-34</li> <li>• 35-39</li> <li>• <math>\geq 40</math></li> </ul>                                                                                                      | PDR         |
| <b>Parity</b>                     |                                                                                                                                                             | Grouped into the following categories: <ul style="list-style-type: none"> <li>• Nulliparous</li> <li>• Multiparous</li> </ul>                                                                                                                                                                             | PDR         |
| <b>Medical risk</b>               | Maternal disease of the respiratory or digestive system, and endocrine, nutritional, or metabolic disease                                                   | O99.5 Diseases of the respiratory system complicating pregnancy, childbirth and the puerperium<br>O99.6 Disease of the digestive system complicating pregnancy, childbirth and the puerperium<br>O99.2 Endocrine, nutritional and metabolic disease complicating pregnancy, childbirth and the puerperium | PDR         |
| <b>Prior obstetric risk</b>       | Has had at least one of the following conditions in past pregnancy: neonatal death, stillbirth, infant with major congenital anomaly, or 1 preterm delivery | Grouped into the following categories: <ul style="list-style-type: none"> <li>• Yes</li> <li>• No</li> </ul>                                                                                                                                                                                              | PDR         |
| <b>Mental disorder or illness</b> | Anxiety, depression, bipolar, postpartum depression, other and unknown mental disorders                                                                     | Grouped into the following categories: <ul style="list-style-type: none"> <li>• Yes</li> <li>• No</li> </ul>                                                                                                                                                                                              | PDR         |

|                                    |                                                                                             |                                                                                                                                                                                                                                                                                                                                                                                                                                                                                                                                                                                                                                                                                                                                                                                                                                                                                                                                                              |                              |
|------------------------------------|---------------------------------------------------------------------------------------------|--------------------------------------------------------------------------------------------------------------------------------------------------------------------------------------------------------------------------------------------------------------------------------------------------------------------------------------------------------------------------------------------------------------------------------------------------------------------------------------------------------------------------------------------------------------------------------------------------------------------------------------------------------------------------------------------------------------------------------------------------------------------------------------------------------------------------------------------------------------------------------------------------------------------------------------------------------------|------------------------------|
|                                    |                                                                                             | <p>Codes beginning with:</p> <p>F20 Paranoid schizophrenia</p> <p>F21 Schizotypal disorder</p> <p>F22 Delusional disorders</p> <p>F23 Brief psychotic disorder</p> <p>F24 Shared psychotic disorder</p> <p>F25 Schizoaffective disorder</p> <p>F28 Other psychotic disorder not due to a substance or known physiological condition</p> <p>F29 Unspecified psychosis not due to a substance or known physiological condition</p> <p>F30 Manic episode</p> <p>F31 Bipolar disorder</p> <p>F32 Major depressive disorder, single episode</p> <p>F33 Major depressive disorder, recurrent</p> <p>F34 Persistent mood [affective] disorders</p> <p>F39 Unspecified mood [affective] disorder</p> <p>F40 Phobic anxiety disorders</p> <p>F41 Anxiety disorder</p> <p>F42 Obsessive-compulsive disorder</p> <p>F43 Acute stress reaction</p> <p>O99.3 Mental disorders and disease of the nervous system complicating pregnancy, childbirth and the puerperium</p> |                              |
| <b>Receiving social assistance</b> | Regular MSP subsidy assistance paid for by the Ministry of Employment and Income Assistance | <p>Grouped into the following categories:</p> <ul style="list-style-type: none"> <li>• MSP subsidy assistance code H (100% subsidy)</li> <li>• All other categories (excluded)</li> </ul>                                                                                                                                                                                                                                                                                                                                                                                                                                                                                                                                                                                                                                                                                                                                                                    | MSP Payment Information File |
| <b>Pre-pregnancy BMI</b>           | Ratio of a women's pre-pregnancy weight (kg) to height (m)                                  | <p>Grouped into the following categories:</p> <ul style="list-style-type: none"> <li>• Underweight (&lt;18.5)</li> <li>• Normal (18.5-24.9)</li> <li>• Overweight (25-29.9)</li> <li>• Obese (<math>\geq 30</math>)</li> <li>• Unknown</li> </ul>                                                                                                                                                                                                                                                                                                                                                                                                                                                                                                                                                                                                                                                                                                            | PDR                          |
| <b>Smoking status</b>              |                                                                                             | <p>Grouped into the following categories:</p> <ul style="list-style-type: none"> <li>• Never</li> <li>• Former</li> <li>• Current</li> <li>• Unknown</li> </ul>                                                                                                                                                                                                                                                                                                                                                                                                                                                                                                                                                                                                                                                                                                                                                                                              | PDR                          |

|                                    |                                                                                                                                                                                                                                                                         |                                                                                                                                                                                                                                                                                                                                                                                                                                                                                                                                                                                                                                                                                                                                                                                                                                                                             |            |
|------------------------------------|-------------------------------------------------------------------------------------------------------------------------------------------------------------------------------------------------------------------------------------------------------------------------|-----------------------------------------------------------------------------------------------------------------------------------------------------------------------------------------------------------------------------------------------------------------------------------------------------------------------------------------------------------------------------------------------------------------------------------------------------------------------------------------------------------------------------------------------------------------------------------------------------------------------------------------------------------------------------------------------------------------------------------------------------------------------------------------------------------------------------------------------------------------------------|------------|
| <p><b>Substance use</b></p>        | <p>Heroin/opioids, cocaine, methadone, solvents, prescription, marijuana, other, unknown drugs</p>                                                                                                                                                                      | <p>Grouped into the following categories:</p> <ul style="list-style-type: none"> <li>• Yes</li> <li>• No or blank</li> </ul> <p>Codes beginning with:</p> <p>F11 Opioid dependence, abuse, use<br/> F12 Cannabis dependence, abuse, use<br/> F13 Sedative, hypnotic or anxiolytic dependence, abuse, use<br/> F14 Cocaine dependence, abuse, use<br/> F15 Other stimulant dependence, abuse, use<br/> F16 Hallucinogen dependence, abuse, use<br/> F18 Inhalant dependence, abuse, use<br/> F19 Other psychoactive substance dependence, abuse, use</p>                                                                                                                                                                                                                                                                                                                     | <p>PDR</p> |
| <p><b>Alcohol use</b></p>          | <p>Alcohol during pregnancy identified as a risk by care provider</p>                                                                                                                                                                                                   | <p>Grouped into the following categories:</p> <ul style="list-style-type: none"> <li>• Yes</li> <li>• No or blank</li> </ul> <p>Codes beginning with:</p> <p>F10 Alcohol dependence, abuse, use with alcohol-induced disorder</p>                                                                                                                                                                                                                                                                                                                                                                                                                                                                                                                                                                                                                                           | <p>PDR</p> |
| <p><b>Antepartum morbidity</b></p> | <p>Hypertension (<math>\geq</math> 140/90) during pregnancy, pregnancy induced hypertension, gestational diabetes insulin dependent, non-insulin dependent, IUGR identified as a risk during the antenatal period, antepartum hemorrhage <math>\geq</math> 20 weeks</p> | <p>Grouped into the following categories:</p> <ul style="list-style-type: none"> <li>• Yes</li> <li>• No</li> </ul> <p>Codes beginning with:</p> <p>O13 Gestational hypertension w/o significant proteinuria<br/> O24.8 Diabetes mellitus arising in pregnancy (gestational)<br/> O99.0 Anemia complicating pregnancy, childbirth and the puerperium<br/> O99.0 Maternal care for restricted fetal growth<br/> O98.4 Viral hepatitis complicating pregnancy, childbirth and the puerperium<br/> O98.5 Other viral diseases complicating pregnancy, childbirth and the puerperium<br/> O98.8 Other maternal infectious and parasitic disease complicating pregnancy, childbirth and the puerperium<br/> O98.9 Unspecified maternal infectious or parasitic disease complicating pregnancy, childbirth and the puerperium<br/> O44.0 Placenta previa specified as without</p> | <p>PDR</p> |

|                                |                                                                                                                                                    |                                                                                                                                                                                                                                                                                                                                                                                                                                                                                                                      |                                                         |
|--------------------------------|----------------------------------------------------------------------------------------------------------------------------------------------------|----------------------------------------------------------------------------------------------------------------------------------------------------------------------------------------------------------------------------------------------------------------------------------------------------------------------------------------------------------------------------------------------------------------------------------------------------------------------------------------------------------------------|---------------------------------------------------------|
|                                |                                                                                                                                                    | <p>haemorrhage</p> <p>O40 Polyhydramnios</p> <p>O41 Oligohydramnios</p> <p>O98.1 Syphilis complicating pregnancy, childbirth and the puerperium</p> <p>O98.2 Gonorrhoea complicating pregnancy, childbirth and the puerperium</p> <p>O98.3 Other infections with a predominantly sexual mode of transmission complicating pregnancy, childbirth and the puerperium</p> <p>O98.7 Human immunodeficiency disease complicating pregnancy, childbirth and the puerperium</p> <p>O45 Premature separation of placenta</p> |                                                         |
| <b>Delivery Year</b>           |                                                                                                                                                    | <p>Grouped into the following categories:</p> <ul style="list-style-type: none"> <li>• 2005</li> <li>• 2006</li> <li>• 2007</li> <li>• 2008</li> <li>• 2009</li> <li>• 2010</li> <li>• 2011</li> <li>• 2012</li> </ul>                                                                                                                                                                                                                                                                                               | PDR                                                     |
| <b>Neighbourhood SEP</b>       | Assigned on the basis of residence, reflects the average single-person income in a geographical area populated by approximately 400-700 people     | <p>Grouped into the following categories:</p> <ul style="list-style-type: none"> <li>• High</li> <li>• Low/Medium</li> </ul>                                                                                                                                                                                                                                                                                                                                                                                         | Population Data BC, Consolidation File                  |
| <b>Urban/rural residence</b>   | Population estimates (2009) of LHAs                                                                                                                | <p>Grouped into the following categories:</p> <ul style="list-style-type: none"> <li>• Urban</li> <li>• Rural</li> <li>• Unknown</li> </ul>                                                                                                                                                                                                                                                                                                                                                                          | BC Stats                                                |
| <b>LHA socioeconomic index</b> | LHAs in BC ranked according to area-level socioeconomic status, based on six indicators: human economic hardship, crime concerns, health problems, | <p>Grouped into the following categories:</p> <ul style="list-style-type: none"> <li>• High</li> <li>• Medium</li> <li>• Low</li> <li>• Unknown</li> </ul>                                                                                                                                                                                                                                                                                                                                                           | BC Stats and a number of social ministries <sup>a</sup> |



|                                                     |                                                                                                                             |                                                                                                                                                     |          |
|-----------------------------------------------------|-----------------------------------------------------------------------------------------------------------------------------|-----------------------------------------------------------------------------------------------------------------------------------------------------|----------|
|                                                     | education concerns, children at risk, and youth at risk                                                                     |                                                                                                                                                     |          |
| <b>LHA income inequality</b>                        | LHAs in BC ranked according to area-level income inequality                                                                 | Grouped into the following categories: <ul style="list-style-type: none"> <li>• High</li> <li>• Medium</li> <li>• Low</li> <li>• Unknown</li> </ul> | BC Stats |
| <b>Northern residence</b>                           | Residing in the Northern Health Authority at delivery                                                                       | Grouped into the following categories: <ul style="list-style-type: none"> <li>• Yes</li> <li>• No</li> </ul>                                        | PDR      |
| <b>Gestational age at birth, in completed weeks</b> | Calculated by algorithm incorporating last menstrual period, first ultrasound, infant exam, and maternal chart <sup>b</sup> | Used for coding small-for-gestational-age and preterm birth                                                                                         | PDR      |
| <b>Small-for-gestational-age birth</b>              | Based on admission weight in grams and infant's gestational age at birth in completed weeks (20 to 44 weeks)                | Grouped according to Kierans' sex-specific birth weight standards <sup>c</sup>                                                                      | PDR      |
| <b>Preterm birth</b>                                | Infant's gestational age at birth in completed weeks                                                                        | Grouped into the following categories: <ul style="list-style-type: none"> <li>• 20 to 36 weeks</li> <li>• Other (excluded)</li> </ul>               | PDR      |

<sup>a</sup> BC Stats. Socio-economic indices: LHA indices reports. Human economic hardship: income inequality measure. 2013 [cited 2014 Nov 4]. From: <http://www.bcstats.gov.bc.ca/StatisticsBySubject/SocialStatistics/SocioEconomicProfilesIndices/SocioEconomicIndices/LHARports.aspx>.

<sup>b</sup> Algorithm for the estimation of gestational age. Canadian Perinatal Surveillance System. Ottawa: Public Health Agency of Canada; 2010.

<sup>c</sup> Kierans W, Kramer M, Wilkins R, et al. Charting birth outcome in British Columbia: determinants of optimal health and ultimate risk--an expansion and update. Vancouver, BC: British Columbia Vital Statistics Agency; 2008 [cited 2017 Feb 16]. From: <http://www.perinatalservicesbc.ca/Documents/Resources/HealthPromotion/BirthCharts/ChartingBirthOutcomeReport.pdf>.

### Appendix C: Adjusted odds ratios with and without control for antepartum morbidity

| Antenatal Model                                                                                                                                                                                                                              | Without Control for Antepartum Morbidity<br>OR (95% CI) | With Control for Antepartum Morbidity<br>OR (95% CI) |
|----------------------------------------------------------------------------------------------------------------------------------------------------------------------------------------------------------------------------------------------|---------------------------------------------------------|------------------------------------------------------|
| <b>Small-for-Gestational-Age Birth (&lt; 10<sup>th</sup> percentile)<sup>a</sup></b>                                                                                                                                                         |                                                         |                                                      |
| <b>MW vs. GP</b>                                                                                                                                                                                                                             | 0.71 (0.62-0.82)                                        | 0.77 (0.67-0.89)                                     |
| <b>MW vs. OB</b>                                                                                                                                                                                                                             | 0.59 (0.50-0.69)                                        | 0.68 (0.59-0.80)                                     |
| <b>GP vs. OB</b>                                                                                                                                                                                                                             | 0.83 (0.76-0.91)                                        | 0.88 (0.80-0.96)                                     |
| <b>Preterm Birth (&lt; 37 weeks gestation)<sup>b</sup></b>                                                                                                                                                                                   |                                                         |                                                      |
| <b>MW vs. GP</b>                                                                                                                                                                                                                             | 0.74 (0.63-0.86)                                        | 0.80 (0.69-0.93)                                     |
| <b>MW vs. OB</b>                                                                                                                                                                                                                             | 0.53 (0.45-0.62)                                        | 0.61 (0.51-0.71)                                     |
| <b>GP vs. OB</b>                                                                                                                                                                                                                             | 0.72 (0.65-0.79)                                        | 0.75 (0.69-0.83)                                     |
| <b>Low Birth Weight (&lt;2500 g.)<sup>c</sup></b>                                                                                                                                                                                            |                                                         |                                                      |
| <b>MW vs. GP</b>                                                                                                                                                                                                                             | 0.66 (0.53-0.82)                                        | 0.80 (0.64-0.99)                                     |
| <b>MW vs. OB</b>                                                                                                                                                                                                                             | 0.43 (0.34-0.54)                                        | 0.58 (0.46-0.74)                                     |
| <b>GP vs. OB</b>                                                                                                                                                                                                                             | 0.65 (0.58-0.74)                                        | 0.73 (0.64-0.83)                                     |
| All models adjusted for maternal age, parity, pre-pregnancy BMI, infant sex, smoking status and substance use.                                                                                                                               |                                                         |                                                      |
| <sup>a</sup> Model also adjusted for mental illness, and LHA socioeconomic rank.                                                                                                                                                             |                                                         |                                                      |
| <sup>b</sup> Model also adjusted for medical risk, prior obstetric risk, delivery year, receipt of social assistance, alcohol use, mental illness, neighbourhood SEP, LHA socioeconomic rank, LHA income inequality, and northern residence. |                                                         |                                                      |
| <sup>c</sup> Model also adjusted for prior obstetric risk.                                                                                                                                                                                   |                                                         |                                                      |

STROBE Statement—Checklist of items that should be included in reports of *cohort studies*

|                              | Item No | Recommendation                                                                                                                                                                                                                                                                                                                                                                                                            |
|------------------------------|---------|---------------------------------------------------------------------------------------------------------------------------------------------------------------------------------------------------------------------------------------------------------------------------------------------------------------------------------------------------------------------------------------------------------------------------|
| <b>Title and abstract</b>    | 1       | (a) Indicate the study's design with a commonly used term in the title or the abstract<br><b>On the title page and Methods section of the abstract</b><br>(b) Provide in the abstract an informative and balanced summary of what was done and what was found<br><b>Methods and Results sections of the abstract</b>                                                                                                      |
| <b>Introduction</b>          |         |                                                                                                                                                                                                                                                                                                                                                                                                                           |
| Background/rationale         | 2       | Explain the scientific background and rationale for the investigation being reported<br><b>Introduction (pg. 6)</b>                                                                                                                                                                                                                                                                                                       |
| Objectives                   | 3       | State specific objectives, including any prespecified hypotheses<br><b>Last sentence of the introduction (pg.6)</b>                                                                                                                                                                                                                                                                                                       |
| <b>Methods</b>               |         |                                                                                                                                                                                                                                                                                                                                                                                                                           |
| Study design                 | 4       | Present key elements of study design early in the paper<br><b>Methods (pgs. 6-7)</b>                                                                                                                                                                                                                                                                                                                                      |
| Setting                      | 5       | Describe the setting, locations, and relevant dates, including periods of recruitment, exposure, follow-up, and data collection<br><b>Methods (pgs. 6-8)</b>                                                                                                                                                                                                                                                              |
| Participants                 | 6       | (a) Give the eligibility criteria, and the sources and methods of selection of participants. Describe methods of follow-up<br><b>Methods (pgs. 9) and Appendix A</b><br>(b) For matched studies, give matching criteria and number of exposed and unexposed<br>N/A                                                                                                                                                        |
| Variables                    | 7       | Clearly define all outcomes, exposures, predictors, potential confounders, and effect modifiers. Give diagnostic criteria, if applicable<br><b>Methods (pgs. 8, 11) and Appendix B</b>                                                                                                                                                                                                                                    |
| Data sources/<br>measurement | 8*      | For each variable of interest, give sources of data and details of methods of assessment (measurement). Describe comparability of assessment methods if there is more than one group<br><b>Methods (pgs. 11) and Appendix B</b>                                                                                                                                                                                           |
| Bias                         | 9       | Describe any efforts to address potential sources of bias<br><b>Methods (pg. 12), Results (pg. 14), Discussion (pg. 20), and Appendix C</b>                                                                                                                                                                                                                                                                               |
| Study size                   | 10      | Explain how the study size was arrived at<br><b>Methods (pg. 10)</b>                                                                                                                                                                                                                                                                                                                                                      |
| Quantitative variables       | 11      | Explain how quantitative variables were handled in the analyses. If applicable, describe which groupings were chosen and why<br><b>Methods (pg. 11) and Appendix B</b>                                                                                                                                                                                                                                                    |
| Statistical methods          | 12      | (a) Describe all statistical methods, including those used to control for confounding<br><b>Methods (pgs. 10-11)</b><br>(b) Describe any methods used to examine subgroups and interactions<br>N/A<br>(c) Explain how missing data were addressed<br><b>Methods (pg. 12)</b><br>(d) If applicable, explain how loss to follow-up was addressed<br>N/A<br>(e) Describe any sensitivity analyses<br><b>Methods (pg. 12)</b> |

| <b>Results</b>           |     |                                                                                                                                                                                                                                                                                                                                                                                                                                                                                                                                                           |
|--------------------------|-----|-----------------------------------------------------------------------------------------------------------------------------------------------------------------------------------------------------------------------------------------------------------------------------------------------------------------------------------------------------------------------------------------------------------------------------------------------------------------------------------------------------------------------------------------------------------|
| Participants             | 13* | <p>(a) Report numbers of individuals at each stage of study—eg numbers potentially eligible, examined for eligibility, confirmed eligible, included in the study, completing follow-up, and analysed</p> <p><b>Figure 1: Eligibility Flow Chart</b></p> <p>(b) Give reasons for non-participation at each stage</p> <p><b>Figure 1: Eligibility Flow Chart</b></p> <p>(c) Consider use of a flow diagram</p> <p><b>Figure 1: Eligibility Flow Chart</b></p>                                                                                               |
| Descriptive data         | 14* | <p>(a) Give characteristics of study participants (eg demographic, clinical, social) and information on exposures and potential confounders</p> <p><b>Table 1 (pgs. 13-15) and Results (pgs. 16-17)</b></p> <p>(b) Indicate number of participants with missing data for each variable of interest</p> <p><b>Table 1 (pgs. 13-15)</b></p> <p>(c) Summarise follow-up time (eg, average and total amount)</p> <p>N/A</p>                                                                                                                                   |
| Outcome data             | 15* | <p>Report numbers of outcome events or summary measures over time</p> <p><b>Table 2 and Results (pg. 16)</b></p>                                                                                                                                                                                                                                                                                                                                                                                                                                          |
| Main results             | 16  | <p>(a) Give unadjusted estimates and, if applicable, confounder-adjusted estimates and their precision (eg, 95% confidence interval). Make clear which confounders were adjusted for and why they were included</p> <p><b>Results (pgs. 16-17), Methods (pgs. 11-12), and Table 2 (pg. 18)</b></p> <p>(b) Report category boundaries when continuous variables were categorized</p> <p><b>Table 1 (pgs. 13-15)</b></p> <p>(c) If relevant, consider translating estimates of relative risk into absolute risk for a meaningful time period</p> <p>N/A</p> |
| Other analyses           | 17  | <p>Report other analyses done—eg analyses of subgroups and interactions, and sensitivity analyses</p> <p><b>Results (pg. 17), Appendix C</b></p>                                                                                                                                                                                                                                                                                                                                                                                                          |
| <b>Discussion</b>        |     |                                                                                                                                                                                                                                                                                                                                                                                                                                                                                                                                                           |
| Key results              | 18  | <p>Summarise key results with reference to study objectives</p> <p><b>First line of Discussion (pg. 19)</b></p>                                                                                                                                                                                                                                                                                                                                                                                                                                           |
| Limitations              | 19  | <p>Discuss limitations of the study, taking into account sources of potential bias or imprecision. Discuss both direction and magnitude of any potential bias</p> <p><b>Discussion (pgs.19-20), Appendix C</b></p>                                                                                                                                                                                                                                                                                                                                        |
| Interpretation           | 20  | <p>Give a cautious overall interpretation of results considering objectives, limitations, multiplicity of analyses, results from similar studies, and other relevant evidence</p> <p><b>Discussion (pgs. 21-23 )</b></p>                                                                                                                                                                                                                                                                                                                                  |
| Generalisability         | 21  | <p>Discuss the generalisability (external validity) of the study results</p> <p><b>Discussion (pg. 19)</b></p>                                                                                                                                                                                                                                                                                                                                                                                                                                            |
| <b>Other information</b> |     |                                                                                                                                                                                                                                                                                                                                                                                                                                                                                                                                                           |
| Funding                  | 22  | <p>Give the source of funding and the role of the funders for the present study and, if applicable, for the original study on which the present article is based</p> <p><b>Acknowledgments (pg. 24), Disclaimers (pg. 24-25)</b></p>                                                                                                                                                                                                                                                                                                                      |

\*Give information separately for exposed and unexposed groups.

# BMJ Open

## Reduced prevalence of small-for-gestational-age and preterm birth for women of low socioeconomic position: a population-based cohort study comparing antenatal midwifery and physician models of care

|                                 |                                                                                                                                                                                                                                                                                                                                                                                                                                                                                                                                                                                                                                                                                                  |
|---------------------------------|--------------------------------------------------------------------------------------------------------------------------------------------------------------------------------------------------------------------------------------------------------------------------------------------------------------------------------------------------------------------------------------------------------------------------------------------------------------------------------------------------------------------------------------------------------------------------------------------------------------------------------------------------------------------------------------------------|
| Journal:                        | <i>BMJ Open</i>                                                                                                                                                                                                                                                                                                                                                                                                                                                                                                                                                                                                                                                                                  |
| Manuscript ID                   | bmjopen-2018-022220.R1                                                                                                                                                                                                                                                                                                                                                                                                                                                                                                                                                                                                                                                                           |
| Article Type:                   | Research                                                                                                                                                                                                                                                                                                                                                                                                                                                                                                                                                                                                                                                                                         |
| Date Submitted by the Author:   | 05-Jun-2018                                                                                                                                                                                                                                                                                                                                                                                                                                                                                                                                                                                                                                                                                      |
| Complete List of Authors:       | McRae, Daphne; University of British Columbia, School of Population and Public Health<br>Janssen, Patricia; University of British Columbia, School of Population and Public Health<br>Vedam, Saraswathi; University of British Columbia, Birth Place Lab, Department of Family Practice<br>Mayhew, Maureen; University of British Columbia, School of Population and Public Health<br>Mpofu, Deborah; University of Saskatchewan, Dept. of Community Health and Epidemiology; Saskatoon Health Region, Saskatoon City Hospital<br>Teucher, Ulrich; University of Saskatchewan, Dept. of Psychology<br>Muhajarine, Nazeem; University of Saskatchewan, Dept. of Community Health and Epidemiology |
| <b>Primary Subject Heading</b>: | Epidemiology                                                                                                                                                                                                                                                                                                                                                                                                                                                                                                                                                                                                                                                                                     |
| Secondary Subject Heading:      | Health services research, Public health                                                                                                                                                                                                                                                                                                                                                                                                                                                                                                                                                                                                                                                          |
| Keywords:                       | midwifery, socioeconomic status, birth outcomes, Quality in health care < HEALTH SERVICES ADMINISTRATION & MANAGEMENT, Fetal medicine < OBSTETRICS, Maternal medicine < OBSTETRICS                                                                                                                                                                                                                                                                                                                                                                                                                                                                                                               |
|                                 |                                                                                                                                                                                                                                                                                                                                                                                                                                                                                                                                                                                                                                                                                                  |

SCHOLARONE™  
Manuscripts

1  
2  
3 **Reduced prevalence of small-for-gestational-age and preterm birth for women of low**  
4 **socioeconomic position: a population-based cohort study comparing antenatal midwifery**  
5 **and physician models of care**  
6

7 **Correspondence to:**

8 Daphne McRae  
9 School of Population and Public Health,  
10 University of British Columbia  
11 2206 E Mall, Vancouver BC Canada V6T 1Z3  
12 Ph: +1 604-794-7729 Fax : +1 604-822-0640  
13 daphne.mcrae@ubc.ca  
14  
15

16  
17 Patricia A. Janssen  
18 School of Population and Public Health,  
19 University of British Columbia  
20 2206 East Mall Vancouver BC Canada V6T 1Z3  
21  
22

23  
24 Saraswathi Vedam  
25 Birth Place Lab, Dept. of Family Practice  
26 University of British Columbia  
27 Suite 304 - 5950 University Boulevard Vancouver BC Canada V6T 1Z3  
28  
29

30  
31 Maureen Mayhew  
32 School of Population and Public Health  
33 University of British Columbia  
34 2206 East Mall Vancouver BC Canada V6T 1Z3  
35

36  
37 Deborah Mpofu  
38 Saskatoon City Hospital  
39 Saskatoon Health Region  
40 701 Queen Street, Saskatoon SK S7K 0M7  
41 and  
42 Dept. of Community Health and Epidemiology  
43 University of Saskatchewan  
44 Box 7 Health Science Building 107 Wiggins Road Saskatoon SK Canada S7N 5E5  
45  
46

47  
48 Ulrich Teucher  
49 Dept. of Psychology  
50 University of Saskatchewan  
51 9 Campus Drive Saskatoon SK Canada S7N 5A5  
52

53  
54 Nazeem Muhajarine  
55 Dept. of Community Health and Epidemiology  
56 University of Saskatchewan  
57

1  
2  
3 Box 7 Health Science Building 107 Wiggins Road Saskatoon SK Canada S7N 5E5  
4  
5

6 **Keywords:** midwifery, socioeconomic status, birth outcomes, quality in health care, fetal  
7  
8 medicine, maternal medicine  
9

10  
11 **Word count:** 4,574  
12  
13  
14  
15  
16  
17  
18  
19  
20  
21  
22  
23  
24  
25  
26  
27  
28  
29  
30  
31  
32  
33  
34  
35  
36  
37  
38  
39  
40  
41  
42  
43  
44  
45  
46  
47  
48  
49  
50  
51  
52  
53  
54  
55  
56

For peer review only

## ABSTRACT

**Objective:** Our aim was to investigate if antenatal midwifery care was associated with lower odds of small-for-gestational-age (SGA) birth, preterm birth (PTB), or low birth weight (LBW) compared to general practitioner (GP) or obstetrician (OB) models of care for women of low socioeconomic position.

**Setting:** This population level, retrospective cohort study used province-wide maternity, medical billing, and demographic data from British Columbia, Canada.

**Participants:** Our study included 57,872 pregnant women, with low socioeconomic position, who were residents of British Columbia, Canada, carried a singleton fetus, had low to moderate medical/obstetric risk, delivered between 2005-2012, and received medical insurance premium assistance.

**Primary and secondary outcome measures:** We report rates, adjusted odds ratios (aOR), and 95% confidence intervals for the primary outcome, SGA birth (< the 10th percentile), and secondary outcomes, PTB (< 37 weeks completed gestation), and LBW (< 2,500 g.).

**Results:** Our sample included 4,705 midwifery patients, 45,114 GP patients, and 8,053 OB patients. Odds of SGA birth were reduced for patients receiving antenatal midwifery vs. GP (aOR 0.71, 95% CI: 0.62-0.82) or OB care (aOR 0.59, 95% CI: 0.50-0.69). Odds of PTB were lower for antenatal midwifery vs. GP (aOR 0.74, 95% CI: 0.63-0.86) or OB patients (aOR 0.53, 95% CI: 0.45-0.62). Odds of LBW were reduced for midwifery vs. GP (aOR 0.66, 95% CI: 0.53-0.82) or OB patients (aOR 0.43, 95% CI: 0.34-0.54).

**Conclusion:** Antenatal midwifery care in British Columbia, Canada was associated with lower odds of SGA birth, PTB, and LBW, for women of low socioeconomic position, compared to



1  
2  
3 physician models of care. Results support the development of policy to ensure antenatal  
4  
5 midwifery care is available and accessible for women of low socioeconomic position. Future  
6  
7 research is needed to determine the underlying mechanisms linking midwifery care to better birth  
8  
9 outcomes for women of low socioeconomic position.  
10  
11  
12  
13  
14  
15  
16  
17  
18  
19  
20  
21  
22  
23  
24  
25  
26  
27  
28  
29  
30  
31  
32  
33  
34  
35  
36  
37  
38  
39  
40  
41  
42  
43  
44  
45  
46  
47  
48  
49  
50  
51  
52  
53  
54  
55  
56  
57  
58  
59  
60

For peer review only

### Strengths and limitations of this study

- This large, population-level cohort study (n=57,872) represented the majority of pregnant women with low socioeconomic position in British Columbia, Canada (2005-2012)
- The rigorous modelling approach controlled for correlation in outcomes at a family and community level
- Findings are generalizable to other high resource settings which offer similar, publicly funded midwifery services
- Limited by self-selection of care provider which could have introduced differences between cohorts in social/health risks undocumented in the maternity record
- Included a post hoc analysis controlling for antepartum morbidity to assess the magnitude of self-selection bias

## INTRODUCTION

As established in the literature, women of low socioeconomic position (SEP) are more susceptible to poor infant birth outcomes compared to women of higher SEP.<sup>1</sup> In response to this inequity, researchers have sought to determine if antenatal midwifery care could minimize the risk of adverse newborn outcomes for women of low SEP. In a 2016 scoping review of randomized trials and observational studies from high resource countries (1990 to 2015), comparing antenatal midwifery versus physician-led care for women of low SEP,<sup>2</sup> results indicated lower risk of preterm birth (PTB),<sup>3</sup> low birth weight (LBW)<sup>4</sup>, and/or very low birth weight (VLBW)<sup>4,5</sup> for midwives' patients in some studies (or subpopulations within studies), yet other studies indicated no significant difference in outcomes by provider-type.<sup>6-8</sup> Almost all of these studies were limited by non-representative sampling,<sup>3,6,7</sup> inadequate study power,<sup>6,8-10</sup> and/or failure to control for confounders.<sup>4,6</sup> All but one study<sup>6</sup> were conducted in the United States. Addressing these limitations, we conducted a large, population level study among women of low SEP with low to moderate medical/obstetric risk to investigate if antenatal midwifery care was associated with lower odds of small-for-gestational-age (SGA) birth, PTB, or LBW compared to general practitioner (GP) or obstetrician (OB) models of care.

## METHODS

### Study design

Using a retrospective cohort design we examined the association between antenatal models of care and odds of SGA birth, PTB, or LBW among women of low SEP with low to moderate medical/obstetric risk. In British Columbia (BC), women with low to moderate perinatal risk are eligible for midwifery care. Model of care was ascertained using practitioners' antenatal service

1  
2  
3 billing records. Women may have had an initial appointment with a GP if this was their preferred  
4 type of maternity provider, or because they were waitlisted for midwifery care, required an OB  
5 referral, or were unaware of the options for OB or midwifery care until the first prenatal  
6 appointment. Therefore, we did not classify patients' model of care by initial practitioner contact  
7 (intent-to-treat). Rather, patients were classified according to the type of practitioner providing  
8 all of their routine antenatal care, with allowance for one routine visit with another practitioner-  
9 type. Aside from excluding all patients with high perinatal risk, patients with low to moderate  
10 perinatal risk and two or more practitioner-types providing routine antenatal care were excluded  
11 from the study. None of the GP or midwifery patients included in the study had antenatal  
12 conditions recorded in the perinatal record requiring transfer to an OB, nor did any OB patients  
13 have antenatal conditions recorded in the record rendering them ineligible for midwifery care.  
14  
15  
16  
17  
18  
19  
20  
21  
22  
23  
24  
25  
26  
27  
28  
29

30 In British Columbia, GPs and OBs are compensated by the Ministry of Health for each antenatal  
31 visit whereas midwives are compensated according to partial or full trimester of care, regardless  
32 of the number of antenatal visits provided (see Table 1). Antenatal care with a GP was defined as  
33 greater than or equal to three routine antenatal visits with a GP, and less than or equal to one  
34 routine antenatal visit with an OB, or less than or equal to one partial trimester of midwifery  
35 care. Antenatal care with an OB was operationalized as greater than or equal to three routine  
36 antenatal visits with an OB, and less than or equal to one routine antenatal visit with a GP, or less  
37 than or equal to one partial trimester of midwifery care. Antenatal midwifery care was  
38 operationalized as greater than or equal to two partial or full trimesters of midwifery care  
39 (equivalent to a *minimum* exposure of three routine antenatal physician visits), and less than or  
40 equal to one routine GP or OB antenatal visit. Obstetrician consultations were not included as  
41 routine antenatal visits.  
42  
43  
44  
45  
46  
47  
48  
49  
50  
51  
52  
53  
54  
55  
56  
57

**Table 1: Characteristics of antenatal models of care in British Columbia**

|                                                                                                                                                                | TOTAL BC POPULATION                                                                                                             |                                               |                                                                                             |
|----------------------------------------------------------------------------------------------------------------------------------------------------------------|---------------------------------------------------------------------------------------------------------------------------------|-----------------------------------------------|---------------------------------------------------------------------------------------------|
|                                                                                                                                                                | Antenatal Care Provider                                                                                                         |                                               |                                                                                             |
|                                                                                                                                                                | Midwife                                                                                                                         | General Practitioner                          | Obstetrician                                                                                |
| <b>Provider involved in ANC<sup>a</sup></b>                                                                                                                    | 22.4%                                                                                                                           | Unavailable                                   | Unavailable                                                                                 |
| <b>Delivery provider<sup>b</sup></b>                                                                                                                           | 14.0%                                                                                                                           | 32.5%                                         | 51.2%                                                                                       |
| <b>Patient risk-level</b>                                                                                                                                      | Low to moderate <sup>c</sup>                                                                                                    | Low to moderate                               | Low, moderate, & high                                                                       |
| <b>Access to services</b>                                                                                                                                      | Self-referral                                                                                                                   | Self-referral                                 | Referral by a MW or GP on request or by indication, or self-referral for a repeat pregnancy |
| <b>Cost of services for BC residents<sup>d</sup></b>                                                                                                           | 100% coverage by provincial medical insurance                                                                                   | 100% coverage by provincial medical insurance | 100% coverage by provincial medical insurance                                               |
| <b>Practitioner's billing method</b>                                                                                                                           | Per course of care, MWs can bill for full care (100%) or partial care (40% or 60%) per trimester, depending on patient transfer | Per ANC visit                                 | Per ANC visit                                                                               |
|                                                                                                                                                                | STUDY POPULATION <sup>e</sup>                                                                                                   |                                               |                                                                                             |
| <b>Average no. of routine ANC visits</b>                                                                                                                       | 10.9                                                                                                                            | 8.5                                           | 9.0                                                                                         |
| <b>Delivery provider</b>                                                                                                                                       |                                                                                                                                 |                                               |                                                                                             |
| <b>MW</b>                                                                                                                                                      | 77.6%                                                                                                                           | 0.5%                                          | 0.2%                                                                                        |
| <b>GP</b>                                                                                                                                                      | 2.5%                                                                                                                            | 68.3%                                         | 3.1%                                                                                        |
| <b>OB</b>                                                                                                                                                      | 18.2%                                                                                                                           | 26.1%                                         | 93.9%                                                                                       |
| <b>Other</b>                                                                                                                                                   | 1.7%                                                                                                                            | 5.0%                                          | 2.8%                                                                                        |
| Definitions: MW midwife, ANC antenatal care                                                                                                                    |                                                                                                                                 |                                               |                                                                                             |
| <sup>a</sup> any involvement in ANC (2014/15) <sup>11</sup>                                                                                                    |                                                                                                                                 |                                               |                                                                                             |
| <sup>b</sup> may differ from the ANC provider, preliminary data (2016/17) <sup>12</sup>                                                                        |                                                                                                                                 |                                               |                                                                                             |
| <sup>c</sup> based on guidelines produced by the College of Midwives of BC <sup>13</sup>                                                                       |                                                                                                                                 |                                               |                                                                                             |
| <sup>d</sup> residents must be eligible for provincial medical insurance (i.e. Canadian citizens or permanent residents)                                       |                                                                                                                                 |                                               |                                                                                             |
| <sup>e</sup> study population consisted of low SEP women with low to moderate perinatal risk, 2005-2012, this data was unavailable for the total BC population |                                                                                                                                 |                                               |                                                                                             |

1  
2  
3 Ethics approval for this study was granted from the University of Saskatchewan, Biomedical  
4  
5 Research Ethics Board (Reg. No. #1 00001471, #2 00008358) and the University of British  
6  
7 Columbia, Children's and Women's Health Center of BC Research Ethics Board (Reg. No. H14-  
8  
9 01629).

### 14 **Setting**

15  
16  
17 In BC women select their preferred type of maternity caregiver depending on practitioner  
18  
19 availability and as appropriate to their need for specialist care. In rare instances women may have  
20  
21 planned, shared-care between a small pool of midwives and GPs. Midwifery care in the  
22  
23 Canadian context is equivalent to caseload midwifery care as it is practiced in Australia, the UK,  
24  
25 and other European countries. Midwives provide holistic, continuity of care in which a midwife,  
26  
27 or a small pool of midwives, known to a women is/are available on-call 24 hours a day.<sup>14</sup> The  
28  
29 midwifery model is relationship-based with antenatal appointments lasting 30 to 60 minutes on  
30  
31 average<sup>15</sup> to facilitate counselling, education, emotional support, and informed choice.<sup>14</sup> When a  
32  
33 midwifery patient has moderate perinatal risk, as outlined in the BC College of Midwives'  
34  
35 guidelines,<sup>13</sup> midwives are required to consult with a physician (generally an OB) and if high-  
36  
37 risk complications arise they will recommend a transfer to OB care.

38  
39  
40  
41  
42  
43  
44 While many GPs and some OBs function in a continuity of care, relationship-based model, the  
45  
46 volume of need and fee-for-service funding model for physicians leads to shorter antenatal visits.  
47  
48 Within the midwifery model, fees are all inclusive based on care and annual caseloads are  
49  
50 limited allowing for longer antenatal visits on average.<sup>14</sup> All three types of providers follow the  
51  
52 same schedule of antenatal visits.  
53  
54  
55  
56

## Outcomes

Our outcome data for this study was obtained from the BC Perinatal Data Registry (PDR).<sup>16</sup> Registry data was abstracted from hospital and home birth records. As well, International Statistical Classification of Diseases (ICD-10-CA) codes were imported to the PDR from the Canadian Institutes of Health Information Discharge Abstract Database. The PDR captures approximately 99% of all BC births with validation studies reporting a 97% accuracy rate over all data fields.<sup>17</sup>

The primary outcome variable was SGA birth (< 10th percentile) according to Kierans and colleagues' sex-specific birth weight charts.<sup>18</sup> Secondary outcomes included PTB (< 37 weeks completed gestation), and LBW (< 2,500 g.). LBW may be attributable to PTB, intrauterine growth restriction, or both and is reported here to facilitate comparison with other studies.

## Study sample

Our study sample included women who: were residents of BC, received antenatal midwifery, GP or OB care, carried a singleton fetus, had low to moderate medical/obstetric risk, delivered between 1 January 2005 and 31 December 2012, received medical insurance premium assistance, and were not registered Status Indian. All women were classified as having low to moderate medical and obstetric risk if they were eligible for midwifery care throughout the antenatal period according to guidelines produced by the College of Midwives of BC<sup>13</sup> and expert advice from our clinical team members. Conditions rendering women ineligible for midwifery care included diseases of the blood, blood forming organs or of the circulatory system, pre-existing hypertension or diabetes, liver disorders, tuberculosis, or malaria, as recorded in the maternity

1  
2  
3 record, history of more than one PTB, more than two caesarean section deliveries, or more than  
4  
5 two spontaneous abortions (prior to 20 weeks completed gestation), or in the current pregnancy  
6  
7 pre-eclampsia/eclampsia, placenta previa with hemorrhage, isoimmunisation, incompetent  
8  
9 cervix, hyperemesis gravidarum with metabolic disturbance, or age less than 14 years. (See  
10  
11 Appendix A for a complete description of inclusion/exclusion variables and ICD 10-CA codes.)  
12  
13  
14

15  
16  
17 Because the key indicator used to assess low SEP, medical insurance premium assistance, was  
18  
19 not available for Status women (they had their insurance premiums paid through Health Canada)  
20  
21 they were excluded from the study. We operationalized low SEP as receipt of BC Medical  
22  
23 Services Plan (MSP) regular premium subsidy assistance during the year of delivery.<sup>19</sup> Eligibility  
24  
25 for this assistance is based on family, net income ceiling exclusive of federal or provincial  
26  
27 childcare or disability benefits. During the study period the ceiling ranged from \$24,000 to  
28  
29 \$30,000 for a family of three depending on the year of receipt.<sup>19</sup> This is comparable to Statistics  
30  
31 Canada's before-tax, low income cut-off for a family of three (\$23,358 to \$33,933 as of  
32  
33 2008), which is a standard measure of poverty.<sup>20</sup>  
34  
35  
36  
37  
38  
39

#### 40 **Sample Size Estimates**

41  
42 During the study period women living in the poorest neighbourhood income quintiles in Canada  
43  
44 experienced a 9·9% prevalence of SGA.<sup>21</sup> To detect an absolute difference in prevalence of 3%  
45  
46 (similar to estimates of prevalence in the general population) from a baseline of 9·9% we  
47  
48 required a minimum sample of 1,249 MW patients, 2,497 OB patients, and 4,861 GP patients.  
49  
50 Type I error was set at  $p=0\cdot025$  two sided, and type II error set at 0·20. We estimated 16·2% of  
51  
52 the total BC population received MSP premium assistance,<sup>22</sup> equivalent to 4,154 midwifery  
53  
54  
55  
56  
57  
58  
59  
60



1  
2  
3 patients and 36,255 physician patients during the study period, excluding those who would not  
4  
5 meet our criteria for low to moderate obstetrical risk. Sample size calculations were conducted  
6  
7 using OpenEpi 3.01.  
8  
9

## 10 11 12 **Statistical Analyses** 13

14 To assess the association of model of care and SGA, PTB, and LBW, we developed logistic  
15  
16 regression models using a Generalized Estimating Equation approach.<sup>23</sup> This method allowed for  
17  
18 adjustment of variance estimates to accommodate potential correlation for women delivering  
19  
20 multiple infants during the study period and for clustering of effects by community.<sup>23</sup> Differing  
21  
22 correlation structures were specified and compared using the Quasi-Likelihood Under the  
23  
24 Independence model Criteria (QIC) to determine the most appropriate correlation structure (the  
25  
26 smaller the QIC the better the structure's fit).<sup>23</sup> Binomial distributions were specified and models  
27  
28 fitted with an exchangeable correlation structure (in which observations from the same cluster  
29  
30 are assumed to be equally correlated) using logit link functions.<sup>23</sup>  
31  
32  
33  
34  
35  
36  
37

38 We identified potential confounders, tested in our model, from the literature and based on our  
39  
40 clinical experience. Variables analyzed from the PDR included maternal age, parity, medical  
41  
42 risk, prior obstetric risk, pre-pregnancy BMI, infant sex, delivery year, smoking status, substance  
43  
44 use, alcohol use, mental illness, and northern residence. (See Appendix B for a complete list of  
45  
46 covariate descriptions, data sources, and ICD 10-CA codes.) From the Province of BC Statistics  
47  
48 Division (BC Stats) we obtained socioeconomic rankings and income inequality rankings for  
49  
50 each Local Health Area (LHA)—89 geographic and health administrative regions in BC that  
51  
52 aggregate to larger Health Authorities.<sup>24</sup> Income inequality rankings were based on the  
53  
54  
55  
56  
57  
58  
59  
60

1  
2  
3 proportion of each LHA's total income from all households earning less than the median income  
4 compared to each LHA's total income from all households. In an entirely equitable LHA the  
5 poorest half of the households would garner 50% of the total income.<sup>24</sup> We tested this variable  
6 as a potential confounder because it has been hypothesized that residence in a high income  
7 inequality area may increase the risk of poor self-concept potentially leading to lower  
8 commitment to pregnancy and unhealthy lifestyle choices.<sup>25</sup> From the BC Ministry of Health we  
9 received data on women's neighbourhood income quintile, depending on residential postal code  
10 at delivery,<sup>26</sup> and receipt of social assistance<sup>19</sup>—public financial assistance granted to low  
11 income individuals.  
12  
13  
14  
15  
16  
17  
18  
19  
20  
21  
22  
23  
24  
25

26 In logistic regression univariate analyses we identified variables that had Wald chi-square values  
27 of  $p < 0.25$  and retained these for our initial multivariable models.<sup>27</sup> For the final variable  
28 selection we used a manual, backward elimination approach. Variables with a Wald chi-square  
29 p-value  $\geq 0.05$  were excluded from each multivariable model one at a time, beginning with the  
30 variable having the largest p-value.<sup>27</sup> After suspected confounders were removed from a model,  
31 coefficient estimates from models with and without the variable were examined to determine if  
32 the exclusion produced a greater than 20% change in any coefficient in the model. If this  
33 magnitude of change was detected, indicating a meaningful adjustment to (an)other variable(s),  
34 the eliminated variable was returned to the model.<sup>27, p92</sup> This process was repeated until only  
35 variables meeting the criteria or those of clinical significance remained in the model. For births  
36 with no missing information we report unadjusted and adjusted odds ratios and 95% confidence  
37 intervals for SGA, PTB, and LBW by model of care.  
38  
39  
40  
41  
42  
43  
44  
45  
46  
47  
48  
49  
50  
51  
52  
53  
54  
55  
56  
57  
58  
59  
60

1  
2  
3 Lastly, we investigated residual confounding potentially arising from self-selection bias  
4 associated with pre-existing morbidity. If, for example, women chose OB care because of prior  
5 health conditions which were not documented in the PDR, then the OB cohort could be  
6 comprised of systematically higher-risk patients. To assess the potential effect of these  
7 conditions on our final models we conducted sensitivity analyses adjusting our final models for  
8 select antepartum morbidities (see definition in Table 2). We also conducted sensitivity analyses  
9 excluding women with any known pre-existing conditions, to assess the impact of differing rates  
10 of moderate perinatal risk between cohorts on effect estimates. SAS Enterprise 7.1 (SAS  
11 Institute, Cary, NC, USA) was used for data analysis.  
12  
13  
14  
15  
16  
17  
18  
19  
20  
21  
22  
23  
24  
25  
26

### 27 **Patient Involvement**

28  
29 Patients were not involved in the development of the research question or study design.  
30  
31 However, Canadian studies have shown that women of low SEP report more respectful care and  
32 greater autonomy in decision-making within the midwifery model compared to physician-led  
33 models of care.<sup>15,28</sup> Results of this study may be of particular interest to women of low SEP who  
34 have a preference for midwifery care.  
35  
36  
37  
38  
39  
40  
41  
42  
43

### 44 **RESULTS**

45  
46 There were 4,705 midwifery, 45,114 GP, and 8,053 OB pregnancies included in the study  
47 (Figure 1). Both midwives' and OBs' patients were, on average, older than GPs' patients, more  
48 likely to be multiparous, non-smokers, and residing in urban areas (Table 2). Although all  
49 women were of low income at a family-level, a greater proportion of midwifery patients lived in  
50 wealthier towns/districts (LHAs) and neighbourhoods compared to GP or OB patients. This may  
51  
52  
53  
54  
55  
56  
57  
58  
59  
60

1  
2  
3 be a reflection of health policy influencing the distribution of midwifery availability across the  
4  
5 province. Midwifery care may be more available in desirable (i.e. wealthier, southern, urban)  
6  
7 areas as midwives are able to choose where they will open a practice and they are not eligible for  
8  
9 the same financial incentives offered to rural and remote physicians.<sup>29</sup>  
10  
11  
12  
13  
14  
15  
16  
17  
18  
19  
20  
21  
22  
23  
24  
25  
26  
27  
28  
29  
30  
31  
32  
33  
34  
35  
36  
37  
38  
39  
40  
41  
42  
43  
44  
45  
46  
47  
48  
49  
50  
51  
52  
53  
54  
55  
56  
57  
58  
59  
60

For peer review only

**Table 2: Frequencies and proportions of maternal characteristics by antenatal model of care, British Columbia, 2005-2012 (n=57,872)**

| Characteristics                                        | Antenatal Model of Care |                    |                   |
|--------------------------------------------------------|-------------------------|--------------------|-------------------|
|                                                        | MW<br>n=4,705 (%)       | GP<br>n=45,114 (%) | OB<br>n=8,053 (%) |
| <b>Age (yrs.)</b>                                      |                         |                    |                   |
| 14-19                                                  | 155 (3·29)              | 4,697 (10·41)      | 338 (4·20)        |
| 20-24                                                  | 893 (18·98)             | 14,789 (32·78)     | 1,447 (17·97)     |
| 25-29                                                  | 1,619 (34·41)           | 13,161 (29·17)     | 2,303 (28·60)     |
| 30-34                                                  | 1,362 (28·95)           | 7,966 (17·66)      | 2,113 (26·24)     |
| 35-39                                                  | 573 (12·18)             | 3,730 (8·27)       | 1,387 (17·22)     |
| ≥40                                                    | 103 (2·19)              | 771 (1·71)         | 465 (5·77)        |
| <b>Parity<sup>a</sup></b>                              |                         |                    |                   |
| Nullipara                                              | 2,177 (46·27)           | 23,141 (51·30)     | 3,617 (44·91)     |
| Multipara                                              | 2,528 (53·73)           | 21,972 (48·70)     | 4,435 (55·07)     |
| <b>Medical risk<sup>b,c</sup></b>                      | 14 (0·30)               | 414 (0·92)         | 132 (1·64)        |
| <b>Prior obstetric risk<sup>b,d</sup></b>              | 124 (2·64)              | 1,669 (3·70)       | 478 (5·94)        |
| <b>Mental illness<sup>b,e</sup></b>                    | 1,020 (21·68)           | 5,146 (11·41)      | 610 (7·57)        |
| <b>Receiving social assistance<sup>b</sup></b>         | 310 (6·59)              | 5,833 (12·93)      | 814 (10·11)       |
| <b>Pre-pregnancy Body Mass Index (BMI)<sup>f</sup></b> |                         |                    |                   |
| Underweight                                            | 229 (4·87)              | 2,300 (5·10)       | 519 (6·44)        |
| Normal                                                 | 2,612 (55·52)           | 16,777 (37·19)     | 2,990 (37·13)     |
| Overweight                                             | 689 (14·64)             | 5,829 (12·92)      | 877 (10·89)       |
| Obese                                                  | 335 (7·12)              | 3,792 (8·41)       | 479 (5·95)        |
| Unknown                                                | 840 (17·85)             | 16,416 (36·39)     | 3,188 (39·59)     |
| <b>Smoking Status</b>                                  |                         |                    |                   |
| Never                                                  | 992 (21·08)             | 6,666 (14·78)      | 1,868 (23·20)     |
| Former                                                 | 690 (14·67)             | 5,028 (11·15)      | 434 (5·39)        |
| Current                                                | 471 (10·01)             | 9,910 (21·97)      | 800 (9·93)        |
| Unknown                                                | 2,552 (54·24)           | 23,510 (52·11)     | 4,951 (61·48)     |
| <b>Substance use in pregnancy<sup>b,g</sup></b>        | 179 (3·80)              | 3,273 (7·25)       | 302 (3·75)        |
| <b>Alcohol identified as a risk<sup>b</sup></b>        | 57 (1·21)               | 1,109 (2·46)       | 63 (0·78)         |
| <b>Utilization of prenatal care<sup>h</sup></b>        |                         |                    |                   |
| Intense                                                | 98 (2·08)               | 304 (0·67)         | 60 (0·75)         |
| Adequate                                               | 1,420 (30·18)           | 6,851 (15·19)      | 902 (11·20)       |
| Intermediate                                           | 1,927 (40·96)           | 19,929 (44·17)     | 2,601 (32·30)     |
| Inadequate                                             | 273 (5·80)              | 6,986 (15·49)      | 980 (12·17)       |
| Unknown                                                | 987 (20·98)             | 11,044 (24·48)     | 3,510 (43·59)     |
| <b>Antepartum morbidity<sup>b,i</sup></b>              | 349 (7·42)              | 6,843 (15·17)      | 1,955 (24·28)     |
| <b>Delivery year</b>                                   |                         |                    |                   |
| 2005                                                   | 307 (6·52)              | 5,772 (12·79)      | 955 (11·86)       |
| 2006                                                   | 437 (9·29)              | 6,028 (13·36)      | 1,002 (12·44)     |
| 2007                                                   | 471 (10·01)             | 6,133 (13·59)      | 1,074 (13·34)     |

|                                                                   |               |                |               |
|-------------------------------------------------------------------|---------------|----------------|---------------|
| 2008                                                              | 512 (10·88)   | 5,892 (13·06)  | 977 (12·13)   |
| 2009                                                              | 606 (12·88)   | 5,640 (12·50)  | 910 (11·30)   |
| 2010                                                              | 694 (14·75)   | 5,371 (11·91)  | 1,000 (12·42) |
| 2011                                                              | 796 (16·92)   | 5,337 (11·83)  | 1,014 (12·59) |
| 2012                                                              | 882 (18·75)   | 4,941 (10·95)  | 1,121 (13·92) |
| <b>Neighbourhood SEP<sup>j</sup></b>                              |               |                |               |
| High                                                              | 624 (13·26)   | 4,984 (11·05)  | 646 (8·02)    |
| Low/Medium                                                        | 4,081 (86·74) | 40,130 (88·95) | 7,407 (91·98) |
| <b>Local Health Area (LHA) Population Demographic<sup>k</sup></b> |               |                |               |
| Urban                                                             | 4,548 (96·66) | 42,489 (94·18) | 7,889 (97·96) |
| Rural                                                             | 145 (3·08)    | 2,576 (5·71)   | 145 (1·80)    |
| Unknown                                                           | 12 (0·26)     | 49 (0·11)      | 19 (0·24)     |
| <b>LHA Socioeconomic Rank<sup>l</sup></b>                         |               |                |               |
| High (Best)                                                       | 2,638 (56·07) | 13,287 (29·45) | 4,043 (50·20) |
| Medium                                                            | 1,472 (31·29) | 22,011 (48·79) | 3,197 (39·70) |
| Low                                                               | 582 (12·37)   | 9,710 (21·52)  | 739 (9·18)    |
| Unknown                                                           | 13 (0·28)     | 106 (0·23)     | 74 (0·92)     |
| <b>LHA Income Inequality Rank<sup>m</sup></b>                     |               |                |               |
| High (Worst)                                                      | 1,667 (35·43) | 10,635 (23·57) | 4,177 (51·87) |
| Medium                                                            | 2,326 (49·44) | 25,544 (56·62) | 3,311 (41·12) |
| Low                                                               | 699 (14·86)   | 8,841 (19·60)  | 530 (6·58)    |
| Unknown                                                           | 13 (0·28)     | 94 (0·21)      | 35 (0·43)     |
| <b>Northern Residence<sup>b,n</sup></b>                           | 136 (2·89)    | 6,032 (13·37)  | 291 (3·61)    |

All characteristics examined differed significantly by model of care ( $X^2$   $p < 0·0001$ )

<sup>a</sup> missing cases amount to 5 or less

<sup>b</sup> values represent cases classified as “Yes”, the remainder of the cases were classified as “No”, “Unknown”, or were undocumented

<sup>c</sup> included maternal disease of the respiratory or digestive system, and endocrine, nutritional, or metabolic disease

<sup>d</sup> included women with at least one of the following conditions in past pregnancy: infant with major congenital anomaly, neonatal death, stillbirth, or one preterm delivery

<sup>e</sup> included any of the following diagnoses prior to, or during the current pregnancy: anxiety disorder, depression, postpartum depression, bipolar disorder, other/unknown (including schizophrenic, mood, and psychotic disorders)

<sup>f</sup> classified according to Health Canada’s guidelines<sup>30</sup>

<sup>g</sup> heroin/opioids, cocaine, methadone, solvents, marijuana, or other/unknown drugs used at any time during pregnancy, prescription or other drug use identified as a risk at any time during pregnancy

<sup>h</sup> classifications based on Kotelchuck’s Adequacy of Prenatal Care Utilization Index<sup>31</sup>

<sup>i</sup> included pregnancy induced hypertension, gestational diabetes (whether or not insulin dependent), anemia, intrauterine growth restriction, viral disease, infection and parasitic disease, placenta previa without hemorrhage, polyhydramnios or oligohydramnios, antepartum hemorrhage  $\geq 20$  weeks, sexually transmitted infection or HIV, or premature separation of the placenta

<sup>j</sup> neighbourhood income quintiles were classified as low/medium (quintiles 1-4) vs. high (quintile 5)<sup>26</sup>  
<sup>k</sup> rural LHAs had a population < 10,000 people  
<sup>l</sup> calculated by BC Stats, based on a range of social determinants of health reflecting area-level economic and social processes, and policy decisions<sup>24</sup>  
<sup>m</sup> calculated by BC Stats<sup>24</sup>  
<sup>n</sup> at the time of delivery, normal residence in BC's Northern Health Authority

Midwifery and OB patients less frequently reported alcohol or substance use during pregnancy compared to GP patients. A higher proportion of GP and OB patients had moderate medical risk and prior obstetric risk than midwifery patients, though midwifery patients had higher prevalence of reported mental illness during or prior to pregnancy (Table 2). Midwife and GP patients had higher rates of overweight or obese BMI than OB patients. Midwives' patients also had higher prevalence of adequate attendance at prenatal care compared to physicians' patients.

Of all infants in our study, 7.09% were SGA, 6.50% were PTB, and 3.32% were LBW (Table 3). On average there was a significant reduction in unadjusted odds of SGA for midwifery vs. GP patients (OR 0.67, 95% CI: 0.58 to 0.77) and midwifery vs. OB patients (OR 0.55, 95% CI: 0.47 to 0.64). GP vs. OB patients were also less likely to have a SGA infant (OR 0.81, 95% CI: 0.75 to 0.89). When controlling for maternal age, parity, pre-pregnancy BMI, infant sex, smoking status, substance use, mental illness, and LHA socioeconomic rank, women receiving antenatal care from midwives vs. GPs had lower odds of having a SGA infant (aOR 0.71, 95% CI: 0.62 to 0.82) (Table 3). Midwifery vs. GP patients also had lower adjusted odds of SGA birth (aOR 0.59, 95% CI: 0.50 to 0.69). GP antenatal care was likewise associated with lower adjusted odds of SGA birth compared to OB care (aOR 0.83, 95% CI: 0.76 to 0.91).

1  
2  
3  
4  
5  
6  
7  
8  
9  
10  
11  
12  
13  
14  
15  
16  
17  
18  
19  
20  
21  
22  
23  
24  
25  
26  
27  
28  
29  
30  
31  
32  
33  
34  
35  
36  
37  
38  
39  
40  
41  
42  
43  
44  
45  
46  
47

**Table 3: Frequencies, proportions and adjusted odds ratios for small-for-gestational-age birth, preterm birth, and low birth weight by antenatal model of care, British Columbia, 2005-2012**

|                        | <b>MW<br/>n= 4,705</b> | <b>GP<br/>n= 45,114</b> | <b>OB<br/>n= 8,053</b> | <b>MW vs. GP</b>   | <b>MW vs. OB</b>   | <b>GP vs. OB</b>   |
|------------------------|------------------------|-------------------------|------------------------|--------------------|--------------------|--------------------|
|                        | <b>n(%)</b>            | <b>n(%)</b>             | <b>n(%)</b>            | <b>OR (95% CI)</b> | <b>OR (95% CI)</b> | <b>OR (95% CI)</b> |
| <b>SGA<sup>a</sup></b> | 227/4,695 (4.83)       | 3,179/45,002 (7.06)     | 689/ 8,025 (8.59)      | 0.71 (0.62-0.82)   | 0.59 (0.50-0.69)   | 0.83 (0.76-0.91)   |
| <b>PTB<sup>b</sup></b> | 207/4,702 (4.40)       | 2,848/45,028 (6.32)     | 698/8,033 (8.69)       | 0.74 (0.63-0.86)   | 0.53 (0.45-0.62)   | 0.72 (0.65-0.79)   |
| <b>LBW<sup>c</sup></b> | 91/4,704 (1.93)        | 1,438/45,091 (3.19)     | 393/8,046 (4.88)       | 0.66 (0.53-0.82)   | 0.43 (0.34-0.54)   | 0.65 (0.58-0.74)   |

All models adjusted for maternal age, parity, pre-pregnancy BMI, infant sex, smoking status and substance use.  
<sup>a</sup>Model also adjusted for mental illness, and LHA socioeconomic rank. Odds ratios based on 4,095 births with SGA and 57,722 total births with no missing information for this analysis.  
<sup>b</sup>Model also adjusted for medical risk, prior obstetric risk, delivery year, receipt of social assistance, alcohol use, mental illness, neighbourhood SEP, LHA socioeconomic rank, LHA income inequality, and northern residence. Odds ratios based on 3,753 PTB births and 57,763 total births with no missing information for this analysis.  
<sup>c</sup>Model also adjusted for prior obstetric risk. Odds ratios based on 1,922 births with LBW and 57,841 total births with no missing information for this analysis.



1  
2  
3 The unadjusted odds of PTB were lower for woman receiving antenatal care from midwives vs.  
4 GPs (OR 0·68, 95% CI: 0·59 to 0·79) and midwives vs. OBs (OR 0·49, 95% CI: 0·41 to 0·57).  
5  
6 GP vs. OB patients also had lower unadjusted odds of PTB (OR 0·71, 95% CI: 0·65 to 0·78).  
7  
8 When adjusting the PTB model for the same variables as the SGA model, as well as for medical  
9  
10 risk, prior obstetric risk, delivery year, receipt of social assistance, alcohol use, neighbourhood  
11  
12 SEP, LHA income inequality, and northern residence, odds of PTB remained statistically  
13  
14 significantly lower for midwifery vs. GP care (aOR 0·74, 95% CI: 0·63 to 0·86) and midwifery  
15  
16 vs. OB care (aOR 0·53, 95% CI: 0·45 to 0·62). On average, GP patients also had lower adjusted  
17  
18 odds of PTB compared to OB patients (aOR 0·72, 95% CI: 0·65 to 0·79).  
19  
20  
21  
22  
23  
24  
25

26 Women receiving antenatal midwifery care had lower unadjusted odds of LBW compared to  
27  
28 those in the care of GPs (OR 0·60, 95% CI: 0·49 to 0·74) or OBs (OR 0·39, 95% CI: 0·31 to  
29  
30 0·50). GP vs. OB patients also had lower unadjusted odds of LBW (OR 0·65, 95% CI: 0·58 to  
31  
32 0·73). After adjustment for maternal age, parity, prior obstetric risk, pre-pregnancy BMI, infant  
33  
34 sex, smoking status, and substance use, women in the care of midwives had lower odds of LBW  
35  
36 compared to GP (aOR 0·66, 95% CI: 0·53 to 0·82) or OB patients (aOR 0·43, 95% CI: 0·34 to  
37  
38 0·54). GP patients also had lower adjusted odds of LBW compared to OB patients (aOR 0·65,  
39  
40 95% CI: 0·58 to 0·74).  
41  
42  
43  
44  
45  
46

47 When testing for residual confounding by controlling for select antepartum morbidities the  
48  
49 associations between model of care and SGA, PTB, and LBW were attenuated but remained  
50  
51 statistically significant (see Appendix C: Table 1). Sensitivity analyses excluding women with  
52  
53  
54  
55  
56  
57

1  
2  
3 prior medical risk or a history of obstetric risk (see Table 2 for definitions) produced results  
4  
5 nearly identical to our final models (see Appendix C: Table 2).  
6  
7  
8  
9

## 10 **DISCUSSION**

### 11 **Strengths and Weaknesses**

12  
13 Our study demonstrated a statistically significant reduction in odds of SGA, PTB, and LBW for  
14  
15 infants born to women of low SEP receiving antenatal midwifery vs. physician-led care in BC,  
16  
17 Canada. This study represented the majority of pregnant, low SEP women in BC during the  
18  
19 study period, had adequate study power, and tested a wide range of individual and area-level  
20  
21 potential confounders. In addition, GEE logistic regression modelling allowed us to account for  
22  
23 correlation in outcomes at a family and community level, a more rigorous modelling approach  
24  
25 than the methods used in previous studies. As this was a large, population based study, findings  
26  
27 are generalizable for other high resource countries which offer similar, publicly funded  
28  
29 midwifery services.  
30  
31  
32  
33  
34  
35  
36  
37

38 Our study was limited by its observational design. As women have been shown to refuse  
39  
40 randomization to retain choice in maternity care provision,<sup>32</sup> and because midwifery care is a  
41  
42 newer, government-funded maternity care option in BC (since 1998) in growing demand,  
43  
44 evidence for causality will need to be established by repeated observational studies with  
45  
46 representative samples over time. This study was also limited by a lack of data on the use of  
47  
48 universal, objective screening tools for alcohol/substance use and mental health conditions, and it  
49  
50 did not include measures of severity. In addition, there was no data available on race/ethnicity,  
51  
52 language, or culture, and we were not able to assess outcomes among women who were Status  
53  
54  
55  
56  
57  
58  
59  
60

1  
2  
3 Indians. It should also be noted that in some cases antenatal midwifery and GP care included  
4 discussion or consultation with OBs for complex cases, and included transfer of care to OBs  
5 during labour and delivery when indicated. Though unmeasured, the quality of collaboration  
6 between practitioners and the use of obstetric referral will have had an influence on the results.  
7  
8  
9  
10

11  
12  
13  
14 Women in the study self-selected their care provider, therefore it is possible that those with  
15 higher perinatal risk (on the low to moderate risk spectrum) chose obstetrician care, creating a  
16 higher risk OB cohort. However, we did control for a wide range of known medical and obstetric  
17 risk factors when indicated, and overall the population had very low prevalence of known pre-  
18 existing risk (medical risk 0.97%, prior obstetric risk 3.92%). In addition, when we conducted  
19 two sensitivity analyses, controlling for antepartum morbidity (Appendix C: Table 1), and  
20 secondly excluding patients with prior medical or obstetric risk (Appendix C: Table 2), the main  
21 associations remained significant. Lastly, because women utilizing midwifery care in BC may  
22 need to be pro-active in ascertaining services early in pregnancy due to high demand, it is  
23 plausible that women who secured midwifery care were more knowledgeable about the health  
24 care system, more invested in their health, or had greater ability to pursue preferred health care  
25 services. These skills, attitudes, and values could have systematically differed between cohorts.  
26  
27  
28 Nonetheless, we did control for smoking, alcohol, and pre-pregnancy BMI, which may reflect  
29 women's attitudes, beliefs, and values during pregnancy, and this may have minimized self-  
30 selection bias.  
31  
32  
33  
34  
35  
36  
37  
38  
39  
40  
41  
42  
43  
44  
45  
46  
47  
48  
49  
50

### 51 **Results in comparison with other studies**

52  
53 Our results for PTB coincide with a 2016 Cochrane review synthesizing the findings of eight  
54 randomized controlled trials (RCTs) testing midwifery-led continuity models of care vs. other  
55  
56  
57

1  
2  
3 models, including midwifery-physician models and medical-led care. In this review, authors  
4 found a 24% reduction in risk of PTB, less than 37 weeks gestation, for midwifery patients  
5 (average risk ratio 0.76, 95% CI: 0.64 to 0.91, n=13,238).<sup>33</sup> This is comparable to our 26%  
6 reduction in odds of PTB, less than 37 weeks gestation, for midwifery vs. GP patients (aOR  
7 0.74, 95% CI: 0.63 to 0.86, n=49,819). As recommended in the Cochrane review, our study  
8 specifically focused on vulnerable women. Observational studies with non-representative  
9 samples (a freestanding birth centre serving primarily low income African American women,<sup>3</sup>  
10 and an Australian, hospital-based cohort study restricted to women  $\leq 21$  years of age<sup>34</sup>) have also  
11 reported findings similar to ours. In a RCT for low SEP women who had high risk of delivering  
12 LBW infants, odds of VLBW was significantly lower among a subgroup of African American  
13 nurse-midwifery patients vs. OB patients (OR 0.35, 95% CI: 0.1 to 0.9).<sup>5</sup> However, there was no  
14 difference in odds of LBW or VLBW by practitioner-type in the overall sample. Additionally, in  
15 a retrospective cohort study<sup>4</sup> comparing outcomes of nurse-midwifery care to usual care for  
16 Medicaid recipients or uninsured patients residing in Westchester County, New York, nurse-  
17 midwifery patients had significantly lower risk of LBW and VLBW. Yet, in this study there was  
18 no adjustment for pre-existing health complications or perinatal risk which may have introduced  
19 bias.  
20  
21  
22  
23  
24  
25  
26  
27  
28  
29  
30  
31  
32  
33  
34  
35  
36  
37  
38  
39  
40  
41  
42  
43  
44

45 Five other midwifery/physician studies involving women of low SEP have reported no  
46 significant differences in SGA or PTB by provider-type.<sup>6-10</sup> Almost all studies were limited by  
47 failure to control for pre-existing medical/obstetric risk<sup>6</sup> or inadequate power to detect clinically  
48 important differences between cohorts.<sup>6,8-10</sup> In one adequately powered, prospective cohort study  
49 (n=2,957)<sup>7</sup> comparing collaborative birth center care provided by midwives (with OB referral for  
50  
51  
52  
53  
54  
55  
56  
57  
58  
59  
60

1  
2  
3 complications) vs. OB or OB resident care, no statistically significant differences were reported.  
4  
5 This study, however, was conducted in the U.S. and comprised of 77% Hispanic women.  
6  
7  
8  
9

### 10 **Experience of antenatal care across models**

11  
12 In our study, adequate antenatal care utilization may have been a mechanism linking midwifery  
13  
14 care to reduced odds of SGA, PTB, and LBW. Midwives' patients had 2·3 times greater odds of  
15  
16 adequately utilizing antenatal care compared to GPs' patients and 2·5 times greater odds  
17  
18 compared to OBs' patients. As revealed in a 2009 qualitative meta-synthesis, antenatal care use  
19  
20 by marginalized women is associated with their perception of their clinician's trustworthiness,  
21  
22 cultural sensitivity, and respect for life experience.<sup>35</sup> Adequate use of antenatal care has been  
23  
24 shown to protect against PTB, stillbirth, and neonatal and infant death.<sup>36</sup> If midwifery's  
25  
26 relationship-based model of care encouraged antenatal care uptake, it may have indirectly  
27  
28 affected prevalence of infant morbidity for women of low SEP.  
29  
30  
31  
32  
33  
34

35  
36 Lack of patient trust may also have inhibited patient disclosure of compromising health  
37  
38 conditions. Midwifery patients had higher prevalence of mental illness overall and for each  
39  
40 category (i.e. depression, anxiety, bipolar disorder) compared to GP or OB patients. Midwives'  
41  
42 patients had a 2·2 fold increase in odds of documented mental illness, compared to GPs' patients  
43  
44 and a 3·4 fold increase compared to OBs' patients. In our study, prevalence of depression for  
45  
46 midwifery patients approximated that reported in the literature. In a review of 16 antenatal and  
47  
48 postnatal depression studies (n=35,419) which were published between 2000 and 2016, and  
49  
50 mainly conducted in western Europe, researchers reported a mean antenatal depression  
51  
52 prevalence of 17·2%.<sup>37</sup> In our study, data on depression was collected between 2008 to 2012.  
53  
54  
55  
56  
57  
58  
59  
60

1  
2  
3 The proportion of midwifery patients with depression prior to or during pregnancy was 18·8% in  
4 contrast to 12·8% for GP patients and 7·4% for OB patients.  
5  
6  
7  
8  
9

10 Greater disclosure of sensitive information to midwives providing caseload midwifery care has  
11 been noted in other studies. In the Australian midwifery cohort study previously cited, young  
12 women receiving caseload midwifery care were significantly ( $p < 0\cdot01$ ) more likely to report a  
13 history of mental illness, illicit drug use, and involvement with the Department of Child Safety  
14 than those receiving standard maternity care.<sup>34</sup> Likewise, in a small retrospective cohort study  
15 (n=194) conducted in the U.K. researchers examined birth outcomes by caseload midwifery care  
16 to standard maternity care for women with vulnerabilities (i.e. experiencing “domestic violence,  
17 homelessness, mental health issues, substance and/or alcohol abuse”).<sup>38, p411</sup> Women in the  
18 caseload midwifery cohort were statistically significantly more likely to receive a referral to  
19 psychiatric care and/or domestic violence or other support services which may be indicative of  
20 higher rates of disclosure among midwifery patients. Of note, in both of these studies patients in  
21 the caseload midwifery cohorts had either a higher mean number of antenatal appointments<sup>38</sup> or a  
22 lower percentage of inadequate prenatal utilization of care (< 5 visits).<sup>34</sup> This likely increased  
23 clinician-patient familiarity which is a component of trust shown to influence domestic abuse  
24 disclosure.<sup>39</sup>  
25  
26  
27  
28  
29  
30  
31  
32  
33  
34  
35  
36  
37  
38  
39  
40  
41  
42  
43  
44  
45  
46

47 In our study, odds of antepartum morbidity were lower for midwives’ vs. physicians’ patients  
48 providing another clue as to the mechanisms linking midwifery care to a reduction in prevalence  
49 of SGA, PTB, and LBW. Midwifery vs. GP patients had 59% lower odds of antepartum  
50 morbidity (see definition in Table 2), and midwifery vs. OB patients had 74% lower odds. When  
51  
52  
53  
54  
55  
56  
57  
58  
59  
60

1  
2  
3 controlling for antepartum morbidity odds of SGA, PTB, and LBW by model of care were  
4  
5 attenuated but remained statistically significant (Appendix C: Table 1). This suggests that even if  
6  
7 antepartum morbidity were related to baseline differences in health status (selection bias), this  
8  
9 could only partially explain the lower odds of adverse infant birth outcomes for women in the  
10  
11 care of midwives vs. physicians. It is plausible longer appointment times and a holistic approach  
12  
13 to care may have made it possible for midwives to identify pre-morbid conditions (i.e. borderline  
14  
15 hypertension or anemia) earlier in pregnancy and implement preventative measures before  
16  
17 conditions progressed to antepartum morbidity.  
18  
19  
20  
21  
22  
23

## 24 **Implications**

25  
26 Study findings indicate a need for policy which supports midwifery availability and accessibility  
27  
28 for women of low SEP. This could include incentivizing midwifery outreach to vulnerable  
29  
30 populations by compensating midwives for the extra time involved in caring for women with  
31  
32 higher socioeconomic risk. It could also mean increasing the volume of midwives practicing in  
33  
34 the province to meet current demand, and conducting targeted public awareness campaigns to  
35  
36 educate low SEP women about the government-funded options available in maternity care.  
37  
38 Future studies are needed to identify which attributes of midwifery care influence infant birth  
39  
40 outcomes for women of low SEP and the mechanisms (i.e. physiological, psychological and/or  
41  
42 behavioural) underlying this association. In our study midwifery care was associated with the  
43  
44 lowest odds of adverse birth outcomes followed by GP, then OB care. Antenatal midwifery and  
45  
46 GP practice may have greater similarity (with respect to continuity in care, provision of  
47  
48 emotional support, and volume of medical intervention) than midwifery to OB care. Therefore, it  
49  
50  
51  
52  
53  
54  
55  
56  
57  
58  
59  
60

1  
2  
3 could be useful to analyze characteristics of practice common to midwifery and GP care but  
4  
5 which differ from OB practice.  
6  
7  
8  
9

## 10 **CONCLUSION**

11  
12 Our study demonstrated lower odds of SGA birth, PTB, and LBW for women of low SEP in BC  
13  
14 who received antenatal midwifery vs. physician-led care. As this was a large, population based  
15  
16 study with adequate study power and control for confounders, our results are generalizable to  
17  
18 other high resource countries offering similar midwifery services. Results of this study support  
19  
20 the development of policy to ensure antenatal midwifery care is available and accessible for  
21  
22 women of low SEP. Further research is needed to determine the mechanisms linking antenatal  
23  
24 midwifery care to better birth outcomes among women of low SEP.  
25  
26  
27  
28  
29

## 30 **ACKNOWLEDGMENTS**

31  
32 We thank Celeste Bickford for assistance in linking the Research Extracts and data preparation.  
33  
34 DNM was supported by an Arthur Smyth Scholarship from the College of Medicine, and a PhD  
35  
36 Scholarship from the Department of Community Health and Epidemiology, University of  
37  
38 Saskatchewan, SK, Canada. PAJ is supported by a Senior Scholar salary award from the BC  
39  
40 Children's Hospital Research Institute, Vancouver, BC, Canada.  
41  
42  
43  
44  
45  
46  
47

## 48 **Disclaimers**

49  
50  
51 All inferences, opinions, and conclusions drawn in this study are those of the authors, and do not  
52  
53 reflect the opinions or policies of the Data Stewards. As of May 2018, DNM has been providing  
54  
55 consulting services to the Midwives Association of BC. No other authors have competing  
56  
57



1  
2  
3 interests to declare. Funding sources had no involvement in the study; the authors are  
4  
5 independent of all funders.  
6  
7  
8  
9

## 10 **Contributors**

11  
12  
13 DNM designed the study, conducted the statistical analyses, interpreted the results, drafted the  
14 initial manuscript, and revised subsequent drafts. NM and PAJ designed the study, reviewed the  
15 statistical analyses, interpreted the results, and reviewed and revised the manuscript. SV, MM  
16 and DM contributed to study design and clinical interpretation, and reviewed and revised the  
17 manuscript. UT contributed to interpretation, and reviewed and revised the manuscript. All  
18 authors approved the final manuscript.  
19  
20  
21  
22  
23  
24  
25  
26  
27  
28  
29

## 30 **Data Sharing**

31  
32 No additional data available.  
33  
34  
35  
36

## 37 **Figure Legend**

38  
39 **Figure 1: Eligibility flow chart** Total number of pregnancies meeting inclusion/exclusion  
40 criteria by cohort.  
41  
42  
43  
44  
45  
46  
47  
48  
49  
50  
51  
52  
53  
54  
55  
56  
57  
58  
59  
60

## References

1. Blumenshine P, Egerter S, Barclay CJ, Cubbin C, Braveman PA. Socioeconomic disparities in adverse birth outcomes: a systematic review. *Am J Prev Med.* 2010;39(3):263-72.
2. McRae DN, Muhajarine N, Stoll K, et al. Is model of care associated with infant birth outcomes among vulnerable women? A scoping review of midwifery-led versus physician-led care. *Soc Sci Med–Pop Health.* 2016;2:182-93.
3. Benatar S, Garrett AB, Howell E, Palmer A. Midwifery care at a freestanding birth center: a safe and effective alternative to conventional maternity care. *Health Serv Res.* 2013;48(5):1750-68.
4. Visintainer P, Uman J, Horgan D, Ibaldo A, Verma U, Tejani N. Reduced risk of low weight births among indigent women receiving care from nurse-midwives. *J Epidemiol Community Health.* 2000;54(3):233-8.
5. Heins HC, Nance NW, McCarthy BJ, Efrid CM. A randomized trial of nurse-midwifery prenatal care to reduce low birth weight. *Obstet Gynecol.* 1990;75(3 Pt 1):341-5.
6. Simonet F, Wilkins R, Labranche E, et al. Primary birthing attendants and birth outcomes in remote Inuit communities--a natural "experiment" in Nunavik, Canada. *J Epidemiol Community Health.* 2009;63(7):546-51.
7. Jackson DJ, Lang JM, Swartz WH, et al. Outcomes, safety, and resource utilization in a collaborative care birth center program compared with traditional physician-based perinatal care. *Am J Public Health.* 2003;93(6):999-1006.
8. Cragin LE. Comparisons of care by nurse-midwives and obstetricians: Birth outcomes for moderate risk women [Ph.D. thesis]. Ann Arbor: University of California, San Francisco; 2002.

- 1  
2  
3 9. Fischler NR, Harvey SM. Setting and provider of prenatal care: association with  
4 pregnancy outcomes among low-income women. *Health Care Women Int.* 1995;16(4):309-21.  
5
- 6  
7 10. McLaughlin FJ, Altemeier WA, Christensen MJ, Sherrod KB, Dietrich MS, Stern DT.  
8 Randomized trial of comprehensive prenatal care for low-income women: effect on infant birth  
9 weight. *Pediatrics.* 1992;89(1):128-32.  
10
- 11 11. Perinatal Services BC (PSBC). Midwifery report. Deliveries in BC. Vancouver, BC:  
12 PSBC; 2016 [cited 2018 May 26]. Available from:  
13  
14 [http://www.perinataleservicesbc.ca/Documents/Data-](http://www.perinataleservicesbc.ca/Documents/Data-Surveillance/Reports/SpecialReports/MidwiferyReport2014_15.pdf)  
15  
16 [Surveillance/Reports/SpecialReports/MidwiferyReport2014\\_15.pdf](http://www.perinataleservicesbc.ca/Documents/Data-Surveillance/Reports/SpecialReports/MidwiferyReport2014_15.pdf).  
17  
18
- 19 12. Perinatal Services BC (PSBC). Annual Report 2016/17. Vancouver, BC: PSBC; 2017  
20 [cited 2018 May 26]. Available from:  
21  
22 [http://www.perinataleservicesbc.ca/Documents/About/AnnualReport/PSBCAnnualReport2016\\_1](http://www.perinataleservicesbc.ca/Documents/About/AnnualReport/PSBCAnnualReport2016_17.pdf)  
23  
24 [7.pdf](http://www.perinataleservicesbc.ca/Documents/About/AnnualReport/PSBCAnnualReport2016_17.pdf).  
25  
26
- 27 13. College of Midwives of British Columbia (CMBC). Indications for Discussion,  
28 Consultation and Transfer of Care: CMBC; 2014 [cited 2017 May 2]. Available from:  
29  
30 [http://www.cmbc.bc.ca/Registrants-Handbook-12-01-Indications-for-Discussion-Consultation-](http://www.cmbc.bc.ca/Registrants-Handbook-12-01-Indications-for-Discussion-Consultation-and-Transfer-of-Care.pdf)  
31  
32 [and-Transfer-of-Care.pdf](http://www.cmbc.bc.ca/Registrants-Handbook-12-01-Indications-for-Discussion-Consultation-and-Transfer-of-Care.pdf).  
33  
34
- 35 14. College of Midwives of British Columbia (CMBC). Midwifery Model of Practice:  
36 CMBC; 2013 [cited 2017 April 22]. Available from:  
37  
38 <http://www.cmbc.bc.ca/pdf.shtml?Registrants-Handbook-11-05-Midwifery-Model-of-Practice>.  
39  
40
- 41 15. Vedam S, Stoll K, Martin K, et al. The Mother's Autonomy in Decision Making  
42 (MADM) scale: patient-led development and psychometric testing of a new instrument to  
43  
44 evaluate experience of maternity care. *PLoS One.* 2017;12(2).  
45  
46  
47  
48  
49  
50  
51  
52  
53  
54  
55  
56  
57  
58  
59  
60

- 1  
2  
3 16. Perinatal Services BC [creator] (2016): British Columbia Perinatal Data Registry.  
4  
5 Population Data BC [publisher]. Data Extract. PSBC (2014) [cited April 6]. Available from:  
6  
7 <http://www.perinataleservicesbc.ca/health-professionals/data-surveillance/perinatal-data-registry>.  
8  
9
- 10 17. British Columbia Perinatal Health Program. British Columbia perinatal database registry  
11  
12 annual report. Vancouver, BC: Perinatal Services BC; 2007 [cited 2017 Jan 17]. Available from:  
13  
14 [http://www.perinataleservicesbc.ca/Documents/Data-](http://www.perinataleservicesbc.ca/Documents/Data-Surveillance/Reports/SurveillanceAnnualReport2007.pdf)  
15  
16 [Surveillance/Reports/SurveillanceAnnualReport2007.pdf](http://www.perinataleservicesbc.ca/Documents/Data-Surveillance/Reports/SurveillanceAnnualReport2007.pdf).  
17  
18
- 19 18. Kierans W, Kramer M, Wilkins R, et al. Charting birth outcome in British Columbia:  
20  
21 determinants of optimal health and ultimate risk--an expansion and update. Vancouver, BC:  
22  
23 British Columbia Vital Statistics Agency; 2008 [cited 2017 Feb 16]. Available from:  
24  
25 <http://www.perinataleservicesbc.ca/Documents/Resources/HealthPromotion/BirthCharts/Charting>  
26  
27 [BirthOutcomeReport.pdf](http://www.perinataleservicesbc.ca/Documents/Resources/HealthPromotion/BirthCharts/Charting).  
28  
29
- 30 19. British Columbia Ministry of Health [creator] (2016): Medical Services Plan (MSP)  
31  
32 Payment Information File. V2. Population Data BC [publisher]. Data Extract. MOH (2014)  
33  
34 [cited 2017 April 6]. Available from: <http://www.popdata.bc.ca/data>.  
35  
36
- 37 20. Statistics Canada. Low income cut-offs for 2008 and low income measures for 2007  
38  
39 Ottawa, ON: Statistics Canada; 2009 [cited 2017 Sept 21]. Available from:  
40  
41 <http://www.statcan.gc.ca/pub/75f0002m/75f0002m2009002-eng.pdf>.  
42  
43
- 44 21. Canadian Institute of Health Information (CIHI). Too early, too small: a profile of small  
45  
46 babies across Canada. Ottawa, ON: CIHI; 2009 [cited 2017 Sept 24]. Available from:  
47  
48 [https://secure.cihi.ca/free\\_products/too\\_early\\_too\\_small\\_en.pdf](https://secure.cihi.ca/free_products/too_early_too_small_en.pdf).  
49  
50
- 51 22. Government of British Columbia. Information release: freedom of information request -  
52  
53 HTH-2015-50271. 2015 [cited 2015 Dec 12]. Available from:  
54  
55  
56  
57  
58  
59  
60

1  
2  
3 <http://www.openinfo.gov.bc.ca/ibc/search/detail.page?config=ibc&P110=recorduid:HTH-2015-50271&title=FOI%20Request%20-%20HTH-2015-50271>.

7 23. SAS Institute Inc. SAS/STAT® 14.3 User's Guide: The GEE procedure Cary, NC: SAS  
8 Institute Inc.; 2017 [cited 2016 Dec 1]. Available from:

11 <http://support.sas.com/documentation/onlinedoc/stat/143/gee.pdf>.

14 24. BC Stats. Socio-economic indices: Local Health Area Indices: Government of BC; 2013  
15 [cited 2017 Dec 12]. Available from: [https://www2.gov.bc.ca/gov/content/data/statistics/people-](https://www2.gov.bc.ca/gov/content/data/statistics/people-population-community/socio-economic-profiles-indices/socio-economic-indices)  
17 [population-community/socio-economic-profiles-indices/socio-economic-indices](https://www2.gov.bc.ca/gov/content/data/statistics/people-population-community/socio-economic-profiles-indices/socio-economic-indices).

21 25. Meng G, Thompson ME, Hall BG. Pathways of neighbourhood-level socio-economic  
22 determinants of adverse birth outcomes. *Int J Health Geogr*. 2013;12(32).

26 26. British Columbia Ministry of Health [creator] (2015): Consolidation File (MSP  
27 Registration & Premium Billing). Population Data BC [publisher]. Data Extract. MOH (2014)  
28 [cited 2017 April 6]. Available from: <http://www.popdata.bc.ca/data>.

33 27. Hosmer DW, Lemeshow S, Sturdivant RX. Applied logistic regression. Hoboken, N.J.:  
34 Wiley; 2013.

37 28. Vedam S, Stoll K, Rubashkin N, et al. The Mothers on Respect (MOR) index: measuring  
38 quality, safety, and human rights in childbirth. *Soc Sci Med-Pop Health*. 2017;3:201-10.

42 29. Government of B.C. Rural practice programs: Government of B.C.; 2018 [cited 2018  
43 May 24]. Available from: [https://www2.gov.bc.ca/gov/content/health/practitioner-professional-](https://www2.gov.bc.ca/gov/content/health/practitioner-professional-resources/physician-compensation/rural-practice-programs)  
45 [resources/physician-compensation/rural-practice-programs](https://www2.gov.bc.ca/gov/content/health/practitioner-professional-resources/physician-compensation/rural-practice-programs).

49 30. Health Canada. Prenatal nutrition guidelines for health professionals: gestational weight  
50 gain. Ottawa, ON: Health Canada; 2014 [cited 2017 Nov 9]. Available from: [http://www.hc-](http://www.hc-sc.gc.ca/fn-an/nutrition/prenatal/ewba-mbsa-eng.php#t2)  
52 [sc.gc.ca/fn-an/nutrition/prenatal/ewba-mbsa-eng.php#t2](http://www.hc-sc.gc.ca/fn-an/nutrition/prenatal/ewba-mbsa-eng.php#t2).

- 1  
2  
3 31. Kotelchuck M. An evaluation of the Kessner Adequacy of Prenatal Care Index and a  
4 proposed Adequacy of Prenatal Care Utilization Index. *Am J of Pub Health*. 1994;84(9):1414-  
5  
6  
7 20.  
8  
9  
10 32. Allen J, Stapleton H, Tracy S, Kildea S. Is a randomised controlled trial of a maternity  
11 care intervention for pregnant adolescents possible? An Australian feasibility study. *BMC Med*  
12  
13  
14  
15  
16  
17 33. Sandall J, Soltani H, Gates S, Shennan A, Devane D. Midwifery-led continuity models  
18 versus other models of care for childbearing women. *Cochrane Database Syst Rev*. 2016 (Issue  
19  
20  
21 4. Art. No.: CD004667).  
22  
23  
24 34. Allen J, Gibbons K, Beckmann M, Tracy M, Stapleton H, Kildea S. Does model of  
25 maternity care make a difference to birth outcomes for young women? A retrospective cohort  
26  
27  
28  
29  
30  
31 35. Downe S, Finlayson K, Walsh D, Lavender T. 'Weighing up and balancing out': a meta-  
32 synthesis of barriers to antenatal care for marginalised women in high-income countries. *BJOG*.  
33  
34  
35 2009;116(4):518-29.  
36  
37  
38 36. Partridge S, Balayla J, Holcroft CA, Abenhaim HA. Inadequate prenatal care utilization  
39 and risks of infant mortality and poor birth outcome: a retrospective analysis of 28,729,765 U.S.  
40  
41  
42  
43  
44  
45 37. Underwood L, Waldie K, D'Souza S, Peterson ER, Morton S. A review of longitudinal  
46 studies on antenatal and postnatal depression. *Arch Womens Ment Health*. 2016;19(5):711–20.  
47  
48  
49 38. Rayment-Jones H, Murrells T, Sandall J. An investigation of the relationship between the  
50 caseload model of midwifery for socially disadvantaged women and childbirth outcomes using  
51  
52  
53  
54  
55  
56  
57  
58  
59  
60

1  
2  
3 39. Liebschutz J, Battaglia T, Finley E, Averbuch T. Disclosing intimate partner violence to  
4 health care clinicians—what a difference the setting makes: a qualitative study. BMC Public  
5 Health. 2008;8:229.  
6  
7  
8  
9  
10  
11  
12  
13  
14  
15  
16  
17  
18  
19  
20  
21  
22  
23  
24  
25  
26  
27  
28  
29  
30  
31  
32  
33  
34  
35  
36  
37  
38  
39  
40  
41  
42  
43  
44  
45  
46  
47  
48  
49  
50  
51  
52  
53  
54  
55  
56  
57  
58  
59  
60

For peer review only

1  
2  
3  
4  
5  
6  
7  
8  
9  
10  
11  
12  
13  
14  
15  
16  
17  
18  
19  
20  
21  
22  
23  
24  
25  
26  
27  
28  
29  
30  
31  
32  
33  
34  
35  
36  
37  
38  
39  
40  
41  
42  
43  
44  
45  
46  
47  
48  
49  
50  
51  
52  
53  
54  
55  
56  
57  
58  
59  
60



338x190mm (300 x 300 DPI)

Review only



## APPENDIX A: Inclusion/exclusion variables and ICD 10-CA codes

| Variables                                                                                                                    | Available in the PDR Checklist and/or as ICD 10-CA Codes                                                                                                                                                                                                                                                                                                                                                                                                                                                                                                                          |
|------------------------------------------------------------------------------------------------------------------------------|-----------------------------------------------------------------------------------------------------------------------------------------------------------------------------------------------------------------------------------------------------------------------------------------------------------------------------------------------------------------------------------------------------------------------------------------------------------------------------------------------------------------------------------------------------------------------------------|
| <b>BC Health Service Delivery Area (resident)</b>                                                                            | Grouped into the following categories: <ul style="list-style-type: none"> <li>• BC Resident</li> <li>• All other categories (excluded)</li> </ul>                                                                                                                                                                                                                                                                                                                                                                                                                                 |
| <b>Number of births</b>                                                                                                      | Grouped into the following categories: <ul style="list-style-type: none"> <li>• Singleton</li> <li>• All other categories (excluded)</li> </ul>                                                                                                                                                                                                                                                                                                                                                                                                                                   |
| <b>Maternal diseases of the circulatory system and blood/blood forming organs</b>                                            | Codes beginning with: <p>O99.1 Other disease of the blood and blood-forming organs and certain disorders involving the immune mechanism complicating pregnancy</p> <p>O99.4 Disease of the circulatory system complicating pregnancy</p> <p>O99.8 Other specified disease and conditions complicating pregnancy, childbirth and the puerperium</p>                                                                                                                                                                                                                                |
| <b>Pre-existing hypertension complicating pregnancy, hypertensive heart disease, hypertension secondary to renal disease</b> | Codes beginning with: <p>O10.1 Pre-existing hypertensive heart disease complicating pregnancy, childbirth, and the puerperium</p> <p>O10.2 Pre-existing hypertensive renal disease complicating pregnancy, childbirth and the puerperium</p> <p>O10.3 Pre-existing hypertensive heart and renal disease complicating pregnancy, childbirth and the puerperium</p> <p>O10.4 Pre-existing secondary hypertension complicating pregnancy, childbirth and the puerperium</p> <p>O10.9 Unspecified pre-existing hypertension complicating pregnancy, childbirth and the puerperium</p> |
| <b>Antihypertensive drugs, hypertensive chronic renal disease, hypertension due to other causes</b>                          | Grouped into the following categories: <ul style="list-style-type: none"> <li>• Yes (excluded)</li> <li>• No</li> </ul>                                                                                                                                                                                                                                                                                                                                                                                                                                                           |
| <b>Diabetes mellitus (insulin dependent), diabetes mellitus (non-insulin dependent)</b>                                      | Grouped into the following categories: <ul style="list-style-type: none"> <li>• Yes (excluded)</li> <li>• No</li> </ul> <p>Codes beginning with:</p> <p>O24.5 Pre-existing type 1 diabetes mellitus in pregnancy</p> <p>O24.6 Pre-existing type 2 diabetes mellitus in pregnancy</p> <p>O24.7 Pre-existing diabetes mellitus of other or unspecified type in pregnancy</p>                                                                                                                                                                                                        |

|                                                                                      |                                                                                                                                                                                                                                                 |
|--------------------------------------------------------------------------------------|-------------------------------------------------------------------------------------------------------------------------------------------------------------------------------------------------------------------------------------------------|
| <b>Liver disorders</b>                                                               | Codes beginning with:<br>O26.6 Liver disorders in pregnancy, childbirth and the puerperium                                                                                                                                                      |
| <b>Tuberculosis, malaria</b>                                                         | Codes beginning with:<br>O98.0 Tuberculosis complicating pregnancy, childbirth and the puerperium<br>O98.6 Protozoal diseases complicating pregnancy, childbirth and the puerperium                                                             |
| <b>Number of previous pre-term deliveries</b>                                        | Grouped into the following categories: <ul style="list-style-type: none"> <li>• <math>\leq 1</math></li> <li>• <math>&gt;1</math> (excluded)</li> </ul>                                                                                         |
| <b>Previous cesarean deliveries</b>                                                  | Grouped into the following categories: <ul style="list-style-type: none"> <li>• <math>\leq 2</math></li> <li>• <math>&gt;2</math> (excluded)</li> </ul>                                                                                         |
| <b>Number of spontaneous abortions</b>                                               | Grouped into the following categories: <ul style="list-style-type: none"> <li>• <math>\leq 2</math></li> <li>• <math>&gt;2</math> (excluded)</li> </ul>                                                                                         |
| <b>Pre-eclampsia, eclampsia, or either superimposed on pre-existing hypertension</b> | Codes beginning with:<br>O11 Pre-existing hypertensive disorder with superimposed proteinuria<br>O14 Gestational hypertension with significant proteinuria<br>O15 Eclampsia<br>O16 Unspecified maternal hypertension                            |
| <b>Hemorrhage from placenta previa</b>                                               | Codes beginning with:<br>O44.1 Placenta praevia with haemorrhage                                                                                                                                                                                |
| <b>Rh immunoglobulin given or isoimmunization</b>                                    | Grouped into the following categories: <ul style="list-style-type: none"> <li>• Yes (excluded)</li> <li>• No</li> </ul> Codes beginning with:<br>O36.0 Maternal care for rhesus isoimmunization<br>O36.1 Maternal care of other isoimmunization |
| <b>Incompetent cervix</b>                                                            | Codes beginning with:<br>O34.3 Maternal care for cervical incompetence                                                                                                                                                                          |
| <b>Severe hyperemesis</b>                                                            | O21.1 Hyperemesis gravidarum with metabolic disturbance                                                                                                                                                                                         |
| <b>Maternal age</b>                                                                  | Grouped into the following categories: <ul style="list-style-type: none"> <li>• <math>\geq 14</math> years</li> <li>• <math>&lt; 14</math> years (excluded)</li> </ul>                                                                          |
| <b>Delivery date/Infant birth date</b>                                               | Grouped into the following categories: <ul style="list-style-type: none"> <li>• 1 Jan. 2005 to 31 Dec. 2012</li> <li>• All other categories (excluded)</li> </ul>                                                                               |
| <b>Variables</b>                                                                     | <b>Codes available in the MSP Payment Information File</b>                                                                                                                                                                                      |
| <b>General practitioner routine antenatal visit</b>                                  | Claim specialty code "General Practice" and fee item code: <ul style="list-style-type: none"> <li>• 14090 prenatal visit complete exam or</li> </ul>                                                                                            |

|                                                    |                                                                                                                                                                                                                                                                                                                                                                                                                                                                                                                                                                                                                                                                                  |
|----------------------------------------------------|----------------------------------------------------------------------------------------------------------------------------------------------------------------------------------------------------------------------------------------------------------------------------------------------------------------------------------------------------------------------------------------------------------------------------------------------------------------------------------------------------------------------------------------------------------------------------------------------------------------------------------------------------------------------------------|
|                                                    | <ul style="list-style-type: none"> <li>• 14091 prenatal visit subsequent exam or</li> <li>• 04717 prenatal office visit complex obstetrical patient</li> </ul>                                                                                                                                                                                                                                                                                                                                                                                                                                                                                                                   |
| <b>Obstetrician routine antenatal visit</b>        | <p>Claim specialty code “Obstetrician” and fee item code:</p> <ul style="list-style-type: none"> <li>• 14090 prenatal visit complete exam or</li> <li>• 14091 prenatal visit subsequent exam or</li> <li>• 04717 prenatal office visit complex obstetrical patient</li> </ul>                                                                                                                                                                                                                                                                                                                                                                                                    |
| <b>Full or partial trimester of midwifery care</b> | <p>Fee item code:</p> <ul style="list-style-type: none"> <li>• 36010 midwife phase 1 (1st trimester) total care</li> <li>• 36014 midwife phase 1 (1st trimester) trans. to other 40%</li> <li>• 36016 midwife phase 1 (1st trimester) trans. to other 60%</li> <li>• 36020 midwife phase 2 (2nd trimester) total care</li> <li>• 36024 midwife phase 2 (2nd trimester) trans. to other 40%</li> <li>• 36026 midwife phase 2 (2nd trimester) trans. to other 60%</li> <li>• 36030 midwife phase 3 (3rd trimester) total care</li> <li>• 36034 midwife phase 3 (3rd trimester) trans. to other 40%</li> <li>• 36036 midwife Phase 3 (3rd trimester) trans. to other 60%</li> </ul> |
| <b>MSP regular premium subsidy assistance</b>      | <p>Subsidy code:</p> <ul style="list-style-type: none"> <li>• A (100%), B (80%), F (60%), G (40%), H (100% paid by social services)</li> </ul>                                                                                                                                                                                                                                                                                                                                                                                                                                                                                                                                   |

1  
2  
3 **APPENDIX B: Covariate description, data source, and ICD 10-CA codes**  
4  
5  
6

7  
8  
9  
10  
11  
12  
13  
14  
15  
16  
17  
18  
19  
20  
21  
22  
23  
24  
25  
26  
27  
28  
29  
30  
31  
32  
33  
34  
35  
36  
37  
38  
39  
40  
41  
42  
43  
44  
45  
46  
47  
48  
49  
50  
51  
52  
53  
54  
55  
56  
57  
58  
59  
60

| Variable                          | Description                                                                                                                                                 | PDR Checklist or ICD 10-CA Codes                                                                                                                                                                                                                                                                          | Data Source |
|-----------------------------------|-------------------------------------------------------------------------------------------------------------------------------------------------------------|-----------------------------------------------------------------------------------------------------------------------------------------------------------------------------------------------------------------------------------------------------------------------------------------------------------|-------------|
| <b>Maternal age</b>               | Age at date of delivery                                                                                                                                     | Grouped into the following categories: <ul style="list-style-type: none"> <li>• 14-19</li> <li>• 20-24</li> <li>• 25-29</li> <li>• 30-34</li> <li>• 35-39</li> <li>• <math>\geq 40</math></li> </ul>                                                                                                      | PDR         |
| <b>Parity</b>                     |                                                                                                                                                             | Grouped into the following categories: <ul style="list-style-type: none"> <li>• Nulliparous</li> <li>• Multiparous</li> </ul>                                                                                                                                                                             | PDR         |
| <b>Medical risk</b>               | Maternal disease of the respiratory or digestive system, and endocrine, nutritional, or metabolic disease                                                   | O99.5 Diseases of the respiratory system complicating pregnancy, childbirth and the puerperium<br>O99.6 Disease of the digestive system complicating pregnancy, childbirth and the puerperium<br>O99.2 Endocrine, nutritional and metabolic disease complicating pregnancy, childbirth and the puerperium | PDR         |
| <b>Prior obstetric risk</b>       | Has had at least one of the following conditions in past pregnancy: neonatal death, stillbirth, infant with major congenital anomaly, or 1 preterm delivery | Grouped into the following categories: <ul style="list-style-type: none"> <li>• Yes</li> <li>• No</li> </ul>                                                                                                                                                                                              | PDR         |
| <b>Mental disorder or illness</b> | Anxiety, depression, bipolar, postpartum depression, other and unknown mental disorders                                                                     | Grouped into the following categories: <ul style="list-style-type: none"> <li>• Yes</li> <li>• No</li> </ul>                                                                                                                                                                                              | PDR         |

|                                    |                                                                                             |                                                                                                                                                                                                                                                                                                                                                                                                                                                                                                                                                                                                                                                                                                                                                                                                                                                                                                                                                              |                              |
|------------------------------------|---------------------------------------------------------------------------------------------|--------------------------------------------------------------------------------------------------------------------------------------------------------------------------------------------------------------------------------------------------------------------------------------------------------------------------------------------------------------------------------------------------------------------------------------------------------------------------------------------------------------------------------------------------------------------------------------------------------------------------------------------------------------------------------------------------------------------------------------------------------------------------------------------------------------------------------------------------------------------------------------------------------------------------------------------------------------|------------------------------|
|                                    |                                                                                             | <p>Codes beginning with:</p> <p>F20 Paranoid schizophrenia</p> <p>F21 Schizotypal disorder</p> <p>F22 Delusional disorders</p> <p>F23 Brief psychotic disorder</p> <p>F24 Shared psychotic disorder</p> <p>F25 Schizoaffective disorder</p> <p>F28 Other psychotic disorder not due to a substance or known physiological condition</p> <p>F29 Unspecified psychosis not due to a substance or known physiological condition</p> <p>F30 Manic episode</p> <p>F31 Bipolar disorder</p> <p>F32 Major depressive disorder, single episode</p> <p>F33 Major depressive disorder, recurrent</p> <p>F34 Persistent mood [affective] disorders</p> <p>F39 Unspecified mood [affective] disorder</p> <p>F40 Phobic anxiety disorders</p> <p>F41 Anxiety disorder</p> <p>F42 Obsessive-compulsive disorder</p> <p>F43 Acute stress reaction</p> <p>O99.3 Mental disorders and disease of the nervous system complicating pregnancy, childbirth and the puerperium</p> |                              |
| <b>Receiving social assistance</b> | Regular MSP subsidy assistance paid for by the Ministry of Employment and Income Assistance | <p>Grouped into the following categories:</p> <ul style="list-style-type: none"> <li>• MSP subsidy assistance code H (100% subsidy)</li> <li>• All other categories (excluded)</li> </ul>                                                                                                                                                                                                                                                                                                                                                                                                                                                                                                                                                                                                                                                                                                                                                                    | MSP Payment Information File |
| <b>Pre-pregnancy BMI</b>           | Ratio of a women's pre-pregnancy weight (kg) to height (m)                                  | <p>Grouped into the following categories:</p> <ul style="list-style-type: none"> <li>• Underweight (&lt;18.5)</li> <li>• Normal (18.5-24.9)</li> <li>• Overweight (25-29.9)</li> <li>• Obese (<math>\geq 30</math>)</li> <li>• Unknown</li> </ul>                                                                                                                                                                                                                                                                                                                                                                                                                                                                                                                                                                                                                                                                                                            | PDR                          |
| <b>Smoking status</b>              |                                                                                             | <p>Grouped into the following categories:</p> <ul style="list-style-type: none"> <li>• Never</li> <li>• Former</li> <li>• Current</li> <li>• Unknown</li> </ul>                                                                                                                                                                                                                                                                                                                                                                                                                                                                                                                                                                                                                                                                                                                                                                                              | PDR                          |

|                             |                                                                                                                                                                                                                                             |                                                                                                                                                                                                                                                                                                                                                                                                                                                                                                                                                                                                                                                                                                                                                                                                                                           |     |
|-----------------------------|---------------------------------------------------------------------------------------------------------------------------------------------------------------------------------------------------------------------------------------------|-------------------------------------------------------------------------------------------------------------------------------------------------------------------------------------------------------------------------------------------------------------------------------------------------------------------------------------------------------------------------------------------------------------------------------------------------------------------------------------------------------------------------------------------------------------------------------------------------------------------------------------------------------------------------------------------------------------------------------------------------------------------------------------------------------------------------------------------|-----|
| <b>Substance use</b>        | Heroin/opioids, cocaine, methadone, solvents, prescription, marijuana, other, unknown drugs                                                                                                                                                 | Grouped into the following categories: <ul style="list-style-type: none"> <li>• Yes</li> <li>• No or blank</li> </ul> Codes beginning with:<br>F11 Opioid dependence, abuse, use<br>F12 Cannabis dependence, abuse, use<br>F13 Sedative, hypnotic or anxiolytic dependence, abuse, use<br>F14 Cocaine dependence, abuse, use<br>F15 Other stimulant dependence, abuse, use<br>F16 Hallucinogen dependence, abuse, use<br>F18 Inhalant dependence, abuse, use<br>F19 Other psychoactive substance dependence, abuse, use                                                                                                                                                                                                                                                                                                                   | PDR |
| <b>Alcohol use</b>          | Alcohol during pregnancy identified as a risk by care provider                                                                                                                                                                              | Grouped into the following categories: <ul style="list-style-type: none"> <li>• Yes</li> <li>• No or blank</li> </ul> Codes beginning with:<br>F10 Alcohol dependence, abuse, use with alcohol-induced disorder                                                                                                                                                                                                                                                                                                                                                                                                                                                                                                                                                                                                                           | PDR |
| <b>Antepartum morbidity</b> | Hypertension ( $\geq$ 140/90) during pregnancy, pregnancy induced hypertension, gestational diabetes insulin dependent, non-insulin dependent, IUGR identified as a risk during the antenatal period, antepartum hemorrhage $\geq$ 20 weeks | Grouped into the following categories: <ul style="list-style-type: none"> <li>• Yes</li> <li>• No</li> </ul> Codes beginning with:<br>O13 Gestational hypertension w/o significant proteinuria<br>O24.8 Diabetes mellitus arising in pregnancy (gestational)<br>O99.0 Anemia complicating pregnancy, childbirth and the puerperium<br>O99.0 Maternal care for restricted fetal growth<br>O98.4 Viral hepatitis complicating pregnancy, childbirth and the puerperium<br>O98.5 Other viral diseases complicating pregnancy, childbirth and the puerperium<br>O98.8 Other maternal infectious and parasitic disease complicating pregnancy, childbirth and the puerperium<br>O98.9 Unspecified maternal infectious or parasitic disease complicating pregnancy, childbirth and the puerperium<br>O44.0 Placenta previa specified as without | PDR |

|                                |                                                                                                                                                    |                                                                                                                                                                                                                                                                                                                                                                                                                                                                                                                      |                                                         |
|--------------------------------|----------------------------------------------------------------------------------------------------------------------------------------------------|----------------------------------------------------------------------------------------------------------------------------------------------------------------------------------------------------------------------------------------------------------------------------------------------------------------------------------------------------------------------------------------------------------------------------------------------------------------------------------------------------------------------|---------------------------------------------------------|
|                                |                                                                                                                                                    | <p>haemorrhage</p> <p>O40 Polyhydramnios</p> <p>O41 Oligohydramnios</p> <p>O98.1 Syphilis complicating pregnancy, childbirth and the puerperium</p> <p>O98.2 Gonorrhoea complicating pregnancy, childbirth and the puerperium</p> <p>O98.3 Other infections with a predominantly sexual mode of transmission complicating pregnancy, childbirth and the puerperium</p> <p>O98.7 Human immunodeficiency disease complicating pregnancy, childbirth and the puerperium</p> <p>O45 Premature separation of placenta</p> |                                                         |
| <b>Delivery Year</b>           |                                                                                                                                                    | <p>Grouped into the following categories:</p> <ul style="list-style-type: none"> <li>• 2005</li> <li>• 2006</li> <li>• 2007</li> <li>• 2008</li> <li>• 2009</li> <li>• 2010</li> <li>• 2011</li> <li>• 2012</li> </ul>                                                                                                                                                                                                                                                                                               | PDR                                                     |
| <b>Neighbourhood SEP</b>       | Assigned on the basis of residence, reflects the average single-person income in a geographical area populated by approximately 400-700 people     | <p>Grouped into the following categories:</p> <ul style="list-style-type: none"> <li>• High</li> <li>• Low/Medium</li> </ul>                                                                                                                                                                                                                                                                                                                                                                                         | Population Data BC, Consolidation File                  |
| <b>Urban/rural residence</b>   | Population estimates (2009) of LHAs                                                                                                                | <p>Grouped into the following categories:</p> <ul style="list-style-type: none"> <li>• Urban</li> <li>• Rural</li> <li>• Unknown</li> </ul>                                                                                                                                                                                                                                                                                                                                                                          | BC Stats                                                |
| <b>LHA socioeconomic index</b> | LHAs in BC ranked according to area-level socioeconomic status, based on six indicators: human economic hardship, crime concerns, health problems, | <p>Grouped into the following categories:</p> <ul style="list-style-type: none"> <li>• High</li> <li>• Medium</li> <li>• Low</li> <li>• Unknown</li> </ul>                                                                                                                                                                                                                                                                                                                                                           | BC Stats and a number of social ministries <sup>a</sup> |

|                                                     |                                                                                                                             |                                                                                                                                                     |          |
|-----------------------------------------------------|-----------------------------------------------------------------------------------------------------------------------------|-----------------------------------------------------------------------------------------------------------------------------------------------------|----------|
|                                                     | education concerns, children at risk, and youth at risk                                                                     |                                                                                                                                                     |          |
| <b>LHA income inequality</b>                        | LHAs in BC ranked according to area-level income inequality                                                                 | Grouped into the following categories: <ul style="list-style-type: none"> <li>• High</li> <li>• Medium</li> <li>• Low</li> <li>• Unknown</li> </ul> | BC Stats |
| <b>Northern residence</b>                           | Residing in the Northern Health Authority at delivery                                                                       | Grouped into the following categories: <ul style="list-style-type: none"> <li>• Yes</li> <li>• No</li> </ul>                                        | PDR      |
| <b>Gestational age at birth, in completed weeks</b> | Calculated by algorithm incorporating last menstrual period, first ultrasound, infant exam, and maternal chart <sup>b</sup> | Used for coding small-for-gestational-age and preterm birth                                                                                         | PDR      |
| <b>Small-for-gestational-age birth</b>              | Based on admission weight in grams and infant's gestational age at birth in completed weeks (20 to 44 weeks)                | Grouped according to Kierans' sex-specific birth weight standards <sup>c</sup>                                                                      | PDR      |
| <b>Preterm birth</b>                                | Infant's gestational age at birth in completed weeks                                                                        | Grouped into the following categories: <ul style="list-style-type: none"> <li>• 20 to 36 weeks</li> <li>• Other (excluded)</li> </ul>               | PDR      |

<sup>a</sup> BC Stats. Socio-economic indices: LHA indices reports. Human economic hardship: income inequality measure. 2013 [cited 2014 Nov 4]. From: <http://www.bcstats.gov.bc.ca/StatisticsBySubject/SocialStatistics/SocioEconomicProfilesIndices/SocioEconomicIndices/LHARports.aspx>.

<sup>b</sup> Algorithm for the estimation of gestational age. Canadian Perinatal Surveillance System. Ottawa: Public Health Agency of Canada; 2010.

<sup>c</sup> Kierans W, Kramer M, Wilkins R, et al. Charting birth outcome in British Columbia: determinants of optimal health and ultimate risk--an expansion and update. Vancouver, BC: British Columbia Vital Statistics Agency; 2008 [cited 2017 Feb 16]. From: <http://www.perinatalservicesbc.ca/Documents/Resources/HealthPromotion/BirthCharts/ChartingBirthOutcomeReport.pdf>.



## Appendix C: Sensitivity analyses

**Table 1: Adjusted odds ratios with and without control for antepartum morbidity**

| Antenatal Model                                                                                                                                                                                                                              | Without Control for Antepartum Morbidity<br>OR (95% CI) | With Control for Antepartum Morbidity<br>OR (95% CI) |
|----------------------------------------------------------------------------------------------------------------------------------------------------------------------------------------------------------------------------------------------|---------------------------------------------------------|------------------------------------------------------|
| <b>Small-for-Gestational-Age Birth (&lt; 10<sup>th</sup> percentile)<sup>a</sup></b>                                                                                                                                                         |                                                         |                                                      |
| <b>MW vs. GP</b>                                                                                                                                                                                                                             | 0.71 (0.62-0.82)                                        | 0.77 (0.67-0.89)                                     |
| <b>MW vs. OB</b>                                                                                                                                                                                                                             | 0.59 (0.50-0.69)                                        | 0.68 (0.59-0.80)                                     |
| <b>GP vs. OB</b>                                                                                                                                                                                                                             | 0.83 (0.76-0.91)                                        | 0.88 (0.80-0.96)                                     |
| <b>Preterm Birth (&lt; 37 weeks gestation)<sup>b</sup></b>                                                                                                                                                                                   |                                                         |                                                      |
| <b>MW vs. GP</b>                                                                                                                                                                                                                             | 0.74 (0.63-0.86)                                        | 0.80 (0.69-0.93)                                     |
| <b>MW vs. OB</b>                                                                                                                                                                                                                             | 0.53 (0.45-0.62)                                        | 0.61 (0.51-0.71)                                     |
| <b>GP vs. OB</b>                                                                                                                                                                                                                             | 0.72 (0.65-0.79)                                        | 0.75 (0.69-0.83)                                     |
| <b>Low Birth Weight (&lt;2500 g.)<sup>c</sup></b>                                                                                                                                                                                            |                                                         |                                                      |
| <b>MW vs. GP</b>                                                                                                                                                                                                                             | 0.66 (0.53-0.82)                                        | 0.80 (0.64-0.99)                                     |
| <b>MW vs. OB</b>                                                                                                                                                                                                                             | 0.43 (0.34-0.54)                                        | 0.58 (0.46-0.74)                                     |
| <b>GP vs. OB</b>                                                                                                                                                                                                                             | 0.65 (0.58-0.74)                                        | 0.73 (0.64-0.83)                                     |
| All models adjusted for maternal age, parity, pre-pregnancy BMI, infant sex, smoking status and substance use.                                                                                                                               |                                                         |                                                      |
| <sup>a</sup> Model also adjusted for mental illness, and LHA socioeconomic rank.                                                                                                                                                             |                                                         |                                                      |
| <sup>b</sup> Model also adjusted for medical risk, prior obstetric risk, delivery year, receipt of social assistance, alcohol use, mental illness, neighbourhood SEP, LHA socioeconomic rank, LHA income inequality, and northern residence. |                                                         |                                                      |
| <sup>c</sup> Model also adjusted for prior obstetric risk.                                                                                                                                                                                   |                                                         |                                                      |

**Table 2: Adjusted odds ratios for full study population excluding pregnancies in which mothers had prior medical or obstetric risk (n=55,041)**

| <b>Antenatal Model</b>                                                                                                                                                                                   | <b>OR (95% CI)</b> |
|----------------------------------------------------------------------------------------------------------------------------------------------------------------------------------------------------------|--------------------|
| <b>Small-for-Gestational-Age Birth (&lt; 10<sup>th</sup> percentile)<sup>a</sup></b>                                                                                                                     |                    |
| <b>MW vs. GP</b>                                                                                                                                                                                         | 0.71 (0.61-0.82)   |
| <b>MW vs. OB</b>                                                                                                                                                                                         | 0.59 (0.51-0.70)   |
| <b>GP vs. OB</b>                                                                                                                                                                                         | 0.84 (0.77-0.93)   |
| <b>Preterm Birth (&lt; 37 weeks gestation)<sup>b</sup></b>                                                                                                                                               |                    |
| <b>MW vs. GP</b>                                                                                                                                                                                         | 0.72 (0.61-0.84)   |
| <b>MW vs. OB</b>                                                                                                                                                                                         | 0.52 (0.43-0.61)   |
| <b>GP vs. OB</b>                                                                                                                                                                                         | 0.72 (0.65-0.80)   |
| <b>Low Birth Weight (&lt;2500 g.)</b>                                                                                                                                                                    |                    |
| <b>MW vs. GP</b>                                                                                                                                                                                         | 0.66 (0.53-0.82)   |
| <b>MW vs. OB</b>                                                                                                                                                                                         | 0.44 (0.35-0.56)   |
| <b>GP vs. OB</b>                                                                                                                                                                                         | 0.67 (0.59-0.76)   |
| All models adjusted for maternal age, parity, pre-pregnancy BMI, infant sex, smoking status and substance use.                                                                                           |                    |
| <sup>a</sup> Model also adjusted for mental illness, and LHA socioeconomic rank.                                                                                                                         |                    |
| <sup>b</sup> Model also adjusted for delivery year, receipt of social assistance, alcohol use, mental illness, neighbourhood SEP, LHA socioeconomic rank, LHA income inequality, and northern residence. |                    |

STROBE Statement—Checklist of items that should be included in reports of *cohort studies*

|                              | Item No | Recommendation                                                                                                                                                                                                                                                                                                                                                                                                            |
|------------------------------|---------|---------------------------------------------------------------------------------------------------------------------------------------------------------------------------------------------------------------------------------------------------------------------------------------------------------------------------------------------------------------------------------------------------------------------------|
| <b>Title and abstract</b>    | 1       | (a) Indicate the study's design with a commonly used term in the title or the abstract<br><b>On the title page and Methods section of the abstract</b><br>(b) Provide in the abstract an informative and balanced summary of what was done and what was found<br><b>Methods and Results sections of the abstract</b>                                                                                                      |
| <b>Introduction</b>          |         |                                                                                                                                                                                                                                                                                                                                                                                                                           |
| Background/rationale         | 2       | Explain the scientific background and rationale for the investigation being reported<br><b>Introduction (pg. 6)</b>                                                                                                                                                                                                                                                                                                       |
| Objectives                   | 3       | State specific objectives, including any prespecified hypotheses<br><b>Last sentence of the introduction (pg.6)</b>                                                                                                                                                                                                                                                                                                       |
| <b>Methods</b>               |         |                                                                                                                                                                                                                                                                                                                                                                                                                           |
| Study design                 | 4       | Present key elements of study design early in the paper<br><b>Methods (pgs. 6-7)</b>                                                                                                                                                                                                                                                                                                                                      |
| Setting                      | 5       | Describe the setting, locations, and relevant dates, including periods of recruitment, exposure, follow-up, and data collection<br><b>Methods (pgs. 6-9)</b>                                                                                                                                                                                                                                                              |
| Participants                 | 6       | (a) Give the eligibility criteria, and the sources and methods of selection of participants. Describe methods of follow-up<br><b>Methods (pgs. 10) and Appendix A</b><br>(b) For matched studies, give matching criteria and number of exposed and unexposed<br>N/A                                                                                                                                                       |
| Variables                    | 7       | Clearly define all outcomes, exposures, predictors, potential confounders, and effect modifiers. Give diagnostic criteria, if applicable<br><b>Methods (pgs. 10, 11) and Appendix B</b>                                                                                                                                                                                                                                   |
| Data sources/<br>measurement | 8*      | For each variable of interest, give sources of data and details of methods of assessment (measurement). Describe comparability of assessment methods if there is more than one group<br><b>Methods (pgs. 12-13) and Appendix B</b>                                                                                                                                                                                        |
| Bias                         | 9       | Describe any efforts to address potential sources of bias<br><b>Methods (pg. 14), Results (pg. 20), Discussion (pg. 23), and Appendix C</b>                                                                                                                                                                                                                                                                               |
| Study size                   | 10      | Explain how the study size was arrived at<br><b>Methods (pg. 11-12)</b>                                                                                                                                                                                                                                                                                                                                                   |
| Quantitative variables       | 11      | Explain how quantitative variables were handled in the analyses. If applicable, describe which groupings were chosen and why<br><b>Methods (pg. 12-13) and Appendix B</b>                                                                                                                                                                                                                                                 |
| Statistical methods          | 12      | (a) Describe all statistical methods, including those used to control for confounding<br><b>Methods (pgs. 12-14)</b><br>(b) Describe any methods used to examine subgroups and interactions<br>N/A<br>(c) Explain how missing data were addressed<br><b>Methods (pg. 16)</b><br>(d) If applicable, explain how loss to follow-up was addressed<br>N/A<br>(e) Describe any sensitivity analyses<br><b>Methods (pg. 14)</b> |

1

**Results**

2

3

4

5

6

7

8

9

10

11

12

13

14

15

16

17

18

19

20

21

22

23

24

25

26

27

28

29

30

31

32

33

34

35

36

37

38

39

40

41

42

43

44

45

46

47

48

49

50

51

52

53

54

55

56

57

58

59

60

|                          |     |                                                                                                                                                                                                                                                                                                                                                                                                                                                                                                          |
|--------------------------|-----|----------------------------------------------------------------------------------------------------------------------------------------------------------------------------------------------------------------------------------------------------------------------------------------------------------------------------------------------------------------------------------------------------------------------------------------------------------------------------------------------------------|
| Participants             | 13* | (a) Report numbers of individuals at each stage of study—eg numbers potentially eligible, examined for eligibility, confirmed eligible, included in the study, completing follow-up, and analysed<br><b>Figure 1: Eligibility Flow Chart</b><br>(b) Give reasons for non-participation at each stage<br><b>Figure 1: Eligibility Flow Chart</b><br>(c) Consider use of a flow diagram<br><b>Figure 1: Eligibility Flow Chart</b>                                                                         |
| Descriptive data         | 14* | (a) Give characteristics of study participants (eg demographic, clinical, social) and information on exposures and potential confounders<br><b>Table 2 (pgs. 16-17) and Results (pgs. 18)</b><br>(b) Indicate number of participants with missing data for each variable of interest<br><b>Table 2 (pgs. 16-17)</b><br>(c) Summarise follow-up time (eg, average and total amount)<br>N/A                                                                                                                |
| Outcome data             | 15* | Report numbers of outcome events or summary measures over time<br><b>Table 3 and Results (pg. 18)</b>                                                                                                                                                                                                                                                                                                                                                                                                    |
| Main results             | 16  | (a) Give unadjusted estimates and, if applicable, confounder-adjusted estimates and their precision (eg, 95% confidence interval). Make clear which confounders were adjusted for and why they were included<br><b>Results (pgs. 18-19), and Table 3 (pg. 19)</b><br>(b) Report category boundaries when continuous variables were categorized<br><b>Table 2 (pgs. 16-17)</b><br>(c) If relevant, consider translating estimates of relative risk into absolute risk for a meaningful time period<br>N/A |
| Other analyses           | 17  | Report other analyses done—eg analyses of subgroups and interactions, and sensitivity analyses<br><b>Results (pg. 20-21), Appendix C</b>                                                                                                                                                                                                                                                                                                                                                                 |
| <b>Discussion</b>        |     |                                                                                                                                                                                                                                                                                                                                                                                                                                                                                                          |
| Key results              | 18  | Summarise key results with reference to study objectives<br><b>First line of Discussion (pg. 21)</b>                                                                                                                                                                                                                                                                                                                                                                                                     |
| Limitations              | 19  | Discuss limitations of the study, taking into account sources of potential bias or imprecision. Discuss both direction and magnitude of any potential bias<br><b>Discussion (pgs. 21-22), Appendix C</b>                                                                                                                                                                                                                                                                                                 |
| Interpretation           | 20  | Give a cautious overall interpretation of results considering objectives, limitations, multiplicity of analyses, results from similar studies, and other relevant evidence<br><b>Discussion (pgs. 24-26 )</b>                                                                                                                                                                                                                                                                                            |
| Generalisability         | 21  | Discuss the generalisability (external validity) of the study results<br><b>Discussion (pg. 21)</b>                                                                                                                                                                                                                                                                                                                                                                                                      |
| <b>Other information</b> |     |                                                                                                                                                                                                                                                                                                                                                                                                                                                                                                          |
| Funding                  | 22  | Give the source of funding and the role of the funders for the present study and, if applicable, for the original study on which the present article is based<br><b>Acknowledgments (pg. 27), Disclaimers (pg. 27)</b>                                                                                                                                                                                                                                                                                   |

\*Give information separately for exposed and unexposed groups.
