# Supplementary material for: Reduced prevalence of small-for-gestational-age and preterm birth for women of low socioeconomic position: a population-based cohort study comparing antenatal midwifery and physician models of care
Source: PubMed Central journal article supplement — BMJ Open. 2018 Oct 3;8(10):e022220. doi: 10.1136/bmjopen-2018-022220 (PMC6169769; doi:10.1136/bmjopen-2018-022220), 2018-10-03
Supplement: bmjopen-2018-022220supp001.pdf [file bmjopen-2018-022220supp001.pdf]

**APPENDIX A: Inclusion/exclusion variables and ICD 10-CA codes**

| <b>Variables</b>                                                                                                             | <b>Available in the PDR Checklist and/or as ICD 10-CA Codes</b>                                                                                                                                                                                                                                                                                                                                                                                                                                                                                               |
|------------------------------------------------------------------------------------------------------------------------------|---------------------------------------------------------------------------------------------------------------------------------------------------------------------------------------------------------------------------------------------------------------------------------------------------------------------------------------------------------------------------------------------------------------------------------------------------------------------------------------------------------------------------------------------------------------|
| <b>BC Health Service Delivery Area (resident)</b>                                                                            | Grouped into the following categories: <ul style="list-style-type: none"> <li>• BC Resident</li> <li>• All other categories (excluded)</li> </ul>                                                                                                                                                                                                                                                                                                                                                                                                             |
| <b>Number of births</b>                                                                                                      | Grouped into the following categories: <ul style="list-style-type: none"> <li>• Singleton</li> <li>• All other categories (excluded)</li> </ul>                                                                                                                                                                                                                                                                                                                                                                                                               |
| <b>Maternal diseases of the circulatory system and blood/blood forming organs</b>                                            | Codes beginning with:<br>O99.1 Other disease of the blood and blood-forming organs and certain disorders involving the immune mechanism complicating pregnancy<br>O99.4 Disease of the circulatory system complicating pregnancy<br>O99.8 Other specified disease and conditions complicating pregnancy, childbirth and the puerperium                                                                                                                                                                                                                        |
| <b>Pre-existing hypertension complicating pregnancy, hypertensive heart disease, hypertension secondary to renal disease</b> | Codes beginning with:<br>O10.1 Pre-existing hypertensive heart disease complicating pregnancy, childbirth, and the puerperium<br>O10.2 Pre-existing hypertensive renal disease complicating pregnancy, childbirth and the puerperium<br>O10.3 Pre-existing hypertensive heart and renal disease complicating pregnancy, childbirth and the puerperium<br>O10.4 Pre-existing secondary hypertension complicating pregnancy, childbirth and the puerperium<br>O10.9 Unspecified pre-existing hypertension complicating pregnancy, childbirth and the puerperium |
| <b>Antihypertensive drugs, hypertensive chronic renal disease, hypertension due to other causes</b>                          | Grouped into the following categories: <ul style="list-style-type: none"> <li>• Yes (excluded)</li> <li>• No</li> </ul>                                                                                                                                                                                                                                                                                                                                                                                                                                       |
| <b>Diabetes mellitus (insulin dependent), diabetes mellitus (non-insulin dependent)</b>                                      | Grouped into the following categories: <ul style="list-style-type: none"> <li>• Yes (excluded)</li> <li>• No</li> </ul> Codes beginning with:<br>O24.5 Pre-existing type 1 diabetes mellitus in pregnancy<br>O24.6 Pre-existing type 2 diabetes mellitus in pregnancy<br>O24.7 Pre-existing diabetes mellitus of other or unspecified type in pregnancy                                                                                                                                                                                                       |

|                                                                                      |                                                                                                                                                                                                                                                 |
|--------------------------------------------------------------------------------------|-------------------------------------------------------------------------------------------------------------------------------------------------------------------------------------------------------------------------------------------------|
| <b>Liver disorders</b>                                                               | Codes beginning with:<br>O26.6 Liver disorders in pregnancy, childbirth and the puerperium                                                                                                                                                      |
| <b>Tuberculosis, malaria</b>                                                         | Codes beginning with:<br>O98.0 Tuberculosis complicating pregnancy, childbirth and the puerperium<br>O98.6 Protozoal diseases complicating pregnancy, childbirth and the puerperium                                                             |
| <b>Number of previous pre-term deliveries</b>                                        | Grouped into the following categories: <ul style="list-style-type: none"> <li>• <math>\leq 1</math></li> <li>• <math>&gt;1</math> (excluded)</li> </ul>                                                                                         |
| <b>Previous cesarean deliveries</b>                                                  | Grouped into the following categories: <ul style="list-style-type: none"> <li>• <math>\leq 2</math></li> <li>• <math>&gt;2</math> (excluded)</li> </ul>                                                                                         |
| <b>Number of spontaneous abortions</b>                                               | Grouped into the following categories: <ul style="list-style-type: none"> <li>• <math>\leq 2</math></li> <li>• <math>&gt;2</math> (excluded)</li> </ul>                                                                                         |
| <b>Pre-eclampsia, eclampsia, or either superimposed on pre-existing hypertension</b> | Codes beginning with:<br>O11 Pre-existing hypertensive disorder with superimposed proteinuria<br>O14 Gestational hypertension with significant proteinuria<br>O15 Eclampsia<br>O16 Unspecified maternal hypertension                            |
| <b>Hemorrhage from placenta previa</b>                                               | Codes beginning with:<br>O44.1 Placenta praevia with haemorrhage                                                                                                                                                                                |
| <b>Rh immunoglobulin given or isoimmunization</b>                                    | Grouped into the following categories: <ul style="list-style-type: none"> <li>• Yes (excluded)</li> <li>• No</li> </ul> Codes beginning with:<br>O36.0 Maternal care for rhesus isoimmunization<br>O36.1 Maternal care of other isoimmunization |
| <b>Incompetent cervix</b>                                                            | Codes beginning with:<br>O34.3 Maternal care for cervical incompetence                                                                                                                                                                          |
| <b>Severe hyperemesis</b>                                                            | O21.1 Hyperemesis gravidarum with metabolic disturbance                                                                                                                                                                                         |
| <b>Maternal age</b>                                                                  | Grouped into the following categories: <ul style="list-style-type: none"> <li>• <math>\geq 14</math> years</li> <li>• <math>&lt; 14</math> years (excluded)</li> </ul>                                                                          |
| <b>Delivery date/Infant birth date</b>                                               | Grouped into the following categories: <ul style="list-style-type: none"> <li>• 1 Jan. 2005 to 31 Dec. 2012</li> <li>• All other categories (excluded)</li> </ul>                                                                               |
| <b>Variables</b>                                                                     | <b>Codes available in the MSP Payment Information File</b>                                                                                                                                                                                      |
| <b>General practitioner routine antenatal visit</b>                                  | Claim specialty code “General Practice” and fee item code: <ul style="list-style-type: none"> <li>• 14090 prenatal visit complete exam or</li> </ul>                                                                                            |

|                                                    |                                                                                                                                                                                                                                                                                                                                                                                                                                                                                                                                                                                                                                                                                  |
|----------------------------------------------------|----------------------------------------------------------------------------------------------------------------------------------------------------------------------------------------------------------------------------------------------------------------------------------------------------------------------------------------------------------------------------------------------------------------------------------------------------------------------------------------------------------------------------------------------------------------------------------------------------------------------------------------------------------------------------------|
|                                                    | <ul style="list-style-type: none"> <li>• 14091 prenatal visit subsequent exam or</li> <li>• 04717 prenatal office visit complex obstetrical patient</li> </ul>                                                                                                                                                                                                                                                                                                                                                                                                                                                                                                                   |
| <b>Obstetrician routine antenatal visit</b>        | <p>Claim specialty code “Obstetrician” and fee item code:</p> <ul style="list-style-type: none"> <li>• 14090 prenatal visit complete exam or</li> <li>• 14091 prenatal visit subsequent exam or</li> <li>• 04717 prenatal office visit complex obstetrical patient</li> </ul>                                                                                                                                                                                                                                                                                                                                                                                                    |
| <b>Full or partial trimester of midwifery care</b> | <p>Fee item code:</p> <ul style="list-style-type: none"> <li>• 36010 midwife phase 1 (1st trimester) total care</li> <li>• 36014 midwife phase 1 (1st trimester) trans. to other 40%</li> <li>• 36016 midwife phase 1 (1st trimester) trans. to other 60%</li> <li>• 36020 midwife phase 2 (2nd trimester) total care</li> <li>• 36024 midwife phase 2 (2nd trimester) trans. to other 40%</li> <li>• 36026 midwife phase 2 (2nd trimester) trans. to other 60%</li> <li>• 36030 midwife phase 3 (3rd trimester) total care</li> <li>• 36034 midwife phase 3 (3rd trimester) trans. to other 40%</li> <li>• 36036 midwife Phase 3 (3rd trimester) trans. to other 60%</li> </ul> |
| <b>MSP regular premium subsidy assistance</b>      | <p>Subsidy code:</p> <ul style="list-style-type: none"> <li>• A (100%), B (80%), F (60%), G (40%), H (100% paid by social services)</li> </ul>                                                                                                                                                                                                                                                                                                                                                                                                                                                                                                                                   |

## APPENDIX B: Covariate description, data source, and ICD 10-CA codes

| Variable                          | Description                                                                                                                                                 | PDR Checklist or ICD 10-CA Codes                                                                                                                                                                                                                                                                          | Data Source |
|-----------------------------------|-------------------------------------------------------------------------------------------------------------------------------------------------------------|-----------------------------------------------------------------------------------------------------------------------------------------------------------------------------------------------------------------------------------------------------------------------------------------------------------|-------------|
| <b>Maternal age</b>               | Age at date of delivery                                                                                                                                     | Grouped into the following categories: <ul style="list-style-type: none"> <li>• 14-19</li> <li>• 20-24</li> <li>• 25-29</li> <li>• 30-34</li> <li>• 35-39</li> <li>• <math>\geq 40</math></li> </ul>                                                                                                      | PDR         |
| <b>Parity</b>                     |                                                                                                                                                             | Grouped into the following categories: <ul style="list-style-type: none"> <li>• Nulliparous</li> <li>• Multiparous</li> </ul>                                                                                                                                                                             | PDR         |
| <b>Medical risk</b>               | Maternal disease of the respiratory or digestive system, and endocrine, nutritional, or metabolic disease                                                   | O99.5 Diseases of the respiratory system complicating pregnancy, childbirth and the puerperium<br>O99.6 Disease of the digestive system complicating pregnancy, childbirth and the puerperium<br>O99.2 Endocrine, nutritional and metabolic disease complicating pregnancy, childbirth and the puerperium | PDR         |
| <b>Prior obstetric risk</b>       | Has had at least one of the following conditions in past pregnancy: neonatal death, stillbirth, infant with major congenital anomaly, or 1 preterm delivery | Grouped into the following categories: <ul style="list-style-type: none"> <li>• Yes</li> <li>• No</li> </ul>                                                                                                                                                                                              | PDR         |
| <b>Mental disorder or illness</b> | Anxiety, depression, bipolar, postpartum depression, other and unknown mental disorders                                                                     | Grouped into the following categories: <ul style="list-style-type: none"> <li>• Yes</li> <li>• No</li> </ul>                                                                                                                                                                                              | PDR         |

|                                    |                                                                                             |                                                                                                                                                                                                                                                                                                                                                                                                                                                                                                                                                                                                                                                                                                                                                                                                                                                                                                                                                               |                              |
|------------------------------------|---------------------------------------------------------------------------------------------|---------------------------------------------------------------------------------------------------------------------------------------------------------------------------------------------------------------------------------------------------------------------------------------------------------------------------------------------------------------------------------------------------------------------------------------------------------------------------------------------------------------------------------------------------------------------------------------------------------------------------------------------------------------------------------------------------------------------------------------------------------------------------------------------------------------------------------------------------------------------------------------------------------------------------------------------------------------|------------------------------|
|                                    |                                                                                             | <p>Codes beginning with:</p> <p>F20 Paranoid schizophrenia</p> <p>F21 Schizotypal disorder</p> <p>F22 Delusional disorders</p> <p>F23 Brief psychotic disorder</p> <p>F24 Shared psychotic disorder</p> <p>F25 Schizoaffective disorder</p> <p>F28 Other psychotic disorder not due to a substance or known physiological condition</p> <p>F29 Unspecified psychosis not due to a substance or known physiological condition</p> <p>F30 Manic episode</p> <p>F31 Biopolar disorder</p> <p>F32 Major depressive disorder, single episode</p> <p>F33 Major depressive disorder, recurrent</p> <p>F34 Persistent mood [affective] disorders</p> <p>F39 Unspecified mood [affective] disorder</p> <p>F40 Phobic anxiety disorders</p> <p>F41 Anxiety disorder</p> <p>F42 Obsessive-compulsive disorder</p> <p>F43 Acute stress reaction</p> <p>O99.3 Mental disorders and disease of the nervous system complicating pregnancy, childbirth and the puerperium</p> |                              |
| <b>Receiving social assistance</b> | Regular MSP subsidy assistance paid for by the Ministry of Employment and Income Assistance | <p>Grouped into the following categories:</p> <ul style="list-style-type: none"> <li>• MSP subsidy assistance code H (100% subsidy)</li> <li>• All other categories (excluded)</li> </ul>                                                                                                                                                                                                                                                                                                                                                                                                                                                                                                                                                                                                                                                                                                                                                                     | MSP Payment Information File |
| <b>Pre-pregnancy BMI</b>           | Ratio of a women's pre-pregnancy weight (kg) to height (m)                                  | <p>Grouped into the following categories:</p> <ul style="list-style-type: none"> <li>• Underweight (&lt;18.5)</li> <li>• Normal (18.5-24.9)</li> <li>• Overweight (25-29.9)</li> <li>• Obese (<math>\geq 30</math>)</li> <li>• Unknown</li> </ul>                                                                                                                                                                                                                                                                                                                                                                                                                                                                                                                                                                                                                                                                                                             | PDR                          |
| <b>Smoking status</b>              |                                                                                             | <p>Grouped into the following categories:</p> <ul style="list-style-type: none"> <li>• Never</li> <li>• Former</li> <li>• Current</li> <li>• Unknown</li> </ul>                                                                                                                                                                                                                                                                                                                                                                                                                                                                                                                                                                                                                                                                                                                                                                                               | PDR                          |

|                             |                                                                                                                                                                                                                                             |                                                                                                                                                                                                                                                                                                                                                                                                                                                                                                                                                                                                                                                                                                                              |     |
|-----------------------------|---------------------------------------------------------------------------------------------------------------------------------------------------------------------------------------------------------------------------------------------|------------------------------------------------------------------------------------------------------------------------------------------------------------------------------------------------------------------------------------------------------------------------------------------------------------------------------------------------------------------------------------------------------------------------------------------------------------------------------------------------------------------------------------------------------------------------------------------------------------------------------------------------------------------------------------------------------------------------------|-----|
| <b>Substance use</b>        | Heroin/opioids, cocaine, methadone, solvents, prescription, marijuana, other, unknown drugs                                                                                                                                                 | Grouped into the following categories: <ul style="list-style-type: none"> <li>• Yes</li> <li>• No or blank</li> </ul>                                                                                                                                                                                                                                                                                                                                                                                                                                                                                                                                                                                                        | PDR |
|                             |                                                                                                                                                                                                                                             | Codes beginning with:<br>F11 Opioid dependence, abuse, use<br>F12 Cannabis dependence, abuse, use<br>F13 Sedative, hypnotic or anxiolytic dependence, abuse, use<br>F14 Cocaine dependence, abuse, use<br>F15 Other stimulant dependence, abuse, use<br>F16 Hallucinogen dependence, abuse, use<br>F18 Inhalant dependence, abuse, use<br>F19 Other psychoactive substance dependence, abuse, use                                                                                                                                                                                                                                                                                                                            |     |
| <b>Alcohol use</b>          | Alcohol during pregnancy identified as a risk by care provider                                                                                                                                                                              | Grouped into the following categories: <ul style="list-style-type: none"> <li>• Yes</li> <li>• No or blank</li> </ul>                                                                                                                                                                                                                                                                                                                                                                                                                                                                                                                                                                                                        | PDR |
|                             |                                                                                                                                                                                                                                             | Codes beginning with:<br>F10 Alcohol dependence, abuse, use with alcohol-induced disorder                                                                                                                                                                                                                                                                                                                                                                                                                                                                                                                                                                                                                                    |     |
| <b>Antepartum morbidity</b> | Hypertension ( $\geq$ 140/90) during pregnancy, pregnancy induced hypertension, gestational diabetes insulin dependent, non-insulin dependent, IUGR identified as a risk during the antenatal period, antepartum hemorrhage $\geq$ 20 weeks | Grouped into the following categories: <ul style="list-style-type: none"> <li>• Yes</li> <li>• No</li> </ul>                                                                                                                                                                                                                                                                                                                                                                                                                                                                                                                                                                                                                 | PDR |
|                             |                                                                                                                                                                                                                                             | Codes beginning with:<br>O13 Gestational hypertension w/o significant proteinuria<br>O24.8 Diabetes mellitus arising in pregnancy (gestational)<br>O99.0 Anemia complicating pregnancy, childbirth and the puerperium<br>O99.0 Maternal care for restricted fetal growth<br>O98.4 Viral hepatitis complicating pregnancy, childbirth and the puerperium<br>O98.5 Other viral diseases complicating pregnancy, childbirth and the puerperium<br>O98.8 Other maternal infectious and parasitic disease complicating pregnancy, childbirth and the puerperium<br>O98.9 Unspecified maternal infectious or parasitic disease complicating pregnancy, childbirth and the puerperium<br>O44.0 Placenta previa specified as without |     |

|                                |                                                                                                                                                    |                                                                                                                                                                                                                                                                                                                                                                                                                                                                                                                      |                                                         |
|--------------------------------|----------------------------------------------------------------------------------------------------------------------------------------------------|----------------------------------------------------------------------------------------------------------------------------------------------------------------------------------------------------------------------------------------------------------------------------------------------------------------------------------------------------------------------------------------------------------------------------------------------------------------------------------------------------------------------|---------------------------------------------------------|
|                                |                                                                                                                                                    | <p>haemorrhage</p> <p>O40 Polyhydramnios</p> <p>O41 Oligohydramnios</p> <p>O98.1 Syphilis complicating pregnancy, childbirth and the puerperium</p> <p>O98.2 Gonorrhoea complicating pregnancy, childbirth and the puerperium</p> <p>O98.3 Other infections with a predominantly sexual mode of transmission complicating pregnancy, childbirth and the puerperium</p> <p>O98.7 Human immunodeficiency disease complicating pregnancy, childbirth and the puerperium</p> <p>O45 Premature separation of placenta</p> |                                                         |
| <b>Delivery Year</b>           |                                                                                                                                                    | <p>Grouped into the following categories:</p> <ul style="list-style-type: none"> <li>• 2005</li> <li>• 2006</li> <li>• 2007</li> <li>• 2008</li> <li>• 2009</li> <li>• 2010</li> <li>• 2011</li> <li>• 2012</li> </ul>                                                                                                                                                                                                                                                                                               | PDR                                                     |
| <b>Neighbourhood SEP</b>       | Assigned on the basis of residence, reflects the average single-person income in a geographical area populated by approximately 400-700 people     | <p>Grouped into the following categories:</p> <ul style="list-style-type: none"> <li>• High</li> <li>• Low/Medium</li> </ul>                                                                                                                                                                                                                                                                                                                                                                                         | Population Data BC, Consolidation File                  |
| <b>Urban/rural residence</b>   | Population estimates (2009) of LHAs                                                                                                                | <p>Grouped into the following categories:</p> <ul style="list-style-type: none"> <li>• Urban</li> <li>• Rural</li> <li>• Unknown</li> </ul>                                                                                                                                                                                                                                                                                                                                                                          | BC Stats                                                |
| <b>LHA socioeconomic index</b> | LHAs in BC ranked according to area-level socioeconomic status, based on six indicators: human economic hardship, crime concerns, health problems, | <p>Grouped into the following categories:</p> <ul style="list-style-type: none"> <li>• High</li> <li>• Medium</li> <li>• Low</li> <li>• Unknown</li> </ul>                                                                                                                                                                                                                                                                                                                                                           | BC Stats and a number of social ministries <sup>a</sup> |

|                                                     |                                                                                                                             |                                                                                                                                                     |          |
|-----------------------------------------------------|-----------------------------------------------------------------------------------------------------------------------------|-----------------------------------------------------------------------------------------------------------------------------------------------------|----------|
|                                                     | education concerns, children at risk, and youth at risk                                                                     |                                                                                                                                                     |          |
| <b>LHA income inequality</b>                        | LHAs in BC ranked according to area-level income inequality                                                                 | Grouped into the following categories: <ul style="list-style-type: none"> <li>• High</li> <li>• Medium</li> <li>• Low</li> <li>• Unknown</li> </ul> | BC Stats |
| <b>Northern residence</b>                           | Residing in the Northern Health Authority at delivery                                                                       | Grouped into the following categories: <ul style="list-style-type: none"> <li>• Yes</li> <li>• No</li> </ul>                                        | PDR      |
| <b>Gestational age at birth, in completed weeks</b> | Calculated by algorithm incorporating last menstrual period, first ultrasound, infant exam, and maternal chart <sup>b</sup> | Used for coding small-for-gestational-age and preterm birth                                                                                         | PDR      |
| <b>Small-for-gestational-age birth</b>              | Based on admission weight in grams and infant's gestational age at birth in completed weeks (20 to 44 weeks)                | Grouped according to Kierans' sex-specific birth weight standards <sup>c</sup>                                                                      | PDR      |
| <b>Preterm birth</b>                                | Infant's gestational age at birth in completed weeks                                                                        | Grouped into the following categories: <ul style="list-style-type: none"> <li>• 20 to 36 weeks</li> <li>• Other (excluded)</li> </ul>               | PDR      |

<sup>a</sup> BC Stats. Socio-economic indices: LHA indices reports. Human economic hardship: income inequality measure. 2013 [cited 2014 Nov 4]. From: <http://www.bcstats.gov.bc.ca/StatisticsBySubject/SocialStatistics/SocioEconomicProfilesIndices/SocioEconomicIndices/LHARports.aspx>.

<sup>b</sup> Algorithm for the estimation of gestational age. Canadian Perinatal Surveillance System. Ottawa: Public Health Agency of Canada; 2010.

<sup>c</sup> Kierans W, Kramer M, Wilkins R, et al. Charting birth outcome in British Columbia: determinants of optimal health and ultimate risk--an expansion and update. Vancouver, BC: British Columbia Vital Statistics Agency; 2008 [cited 2017 Feb 16]. From: <http://www.perinatalservicesbc.ca/Documents/Resources/HealthPromotion/BirthCharts/ChartingBirthOutcomeReport.pdf>.



## Appendix C: Sensitivity analyses

**Table 1: Adjusted odds ratios with and without control for antepartum morbidity**

| <b>Antenatal Model</b>                                                                                                                                                                                                                       | <b>Without Control for Antepartum Morbidity<br/>OR (95% CI)</b> | <b>With Control for Antepartum Morbidity<br/>OR (95% CI)</b> |
|----------------------------------------------------------------------------------------------------------------------------------------------------------------------------------------------------------------------------------------------|-----------------------------------------------------------------|--------------------------------------------------------------|
| <b>Small-for-Gestational-Age Birth (&lt; 10<sup>th</sup> percentile)<sup>a</sup></b>                                                                                                                                                         |                                                                 |                                                              |
| <b>MW vs. GP</b>                                                                                                                                                                                                                             | 0.71 (0.62-0.82)                                                | 0.77 (0.67-0.89)                                             |
| <b>MW vs. OB</b>                                                                                                                                                                                                                             | 0.59 (0.50-0.69)                                                | 0.68 (0.59-0.80)                                             |
| <b>GP vs. OB</b>                                                                                                                                                                                                                             | 0.83 (0.76-0.91)                                                | 0.88 (0.80-0.96)                                             |
| <b>Preterm Birth (&lt; 37 weeks gestation)<sup>b</sup></b>                                                                                                                                                                                   |                                                                 |                                                              |
| <b>MW vs. GP</b>                                                                                                                                                                                                                             | 0.74 (0.63-0.86)                                                | 0.80 (0.69-0.93)                                             |
| <b>MW vs. OB</b>                                                                                                                                                                                                                             | 0.53 (0.45-0.62)                                                | 0.61 (0.51-0.71)                                             |
| <b>GP vs. OB</b>                                                                                                                                                                                                                             | 0.72 (0.65-0.79)                                                | 0.75 (0.69-0.83)                                             |
| <b>Low Birth Weight (&lt;2500 g.)<sup>c</sup></b>                                                                                                                                                                                            |                                                                 |                                                              |
| <b>MW vs. GP</b>                                                                                                                                                                                                                             | 0.66 (0.53-0.82)                                                | 0.80 (0.64-0.99)                                             |
| <b>MW vs. OB</b>                                                                                                                                                                                                                             | 0.43 (0.34-0.54)                                                | 0.58 (0.46-0.74)                                             |
| <b>GP vs. OB</b>                                                                                                                                                                                                                             | 0.65 (0.58-0.74)                                                | 0.73 (0.64-0.83)                                             |
| All models adjusted for maternal age, parity, pre-pregnancy BMI, infant sex, smoking status and substance use.                                                                                                                               |                                                                 |                                                              |
| <sup>a</sup> Model also adjusted for mental illness, and LHA socioeconomic rank.                                                                                                                                                             |                                                                 |                                                              |
| <sup>b</sup> Model also adjusted for medical risk, prior obstetric risk, delivery year, receipt of social assistance, alcohol use, mental illness, neighbourhood SEP, LHA socioeconomic rank, LHA income inequality, and northern residence. |                                                                 |                                                              |
| <sup>c</sup> Model also adjusted for prior obstetric risk.                                                                                                                                                                                   |                                                                 |                                                              |

**Table 2: Adjusted odds ratios for full study population excluding pregnancies in which mothers had prior medical or obstetric risk (n=55,041)**

| <b>Antenatal Model</b>                                                                                                                                                                                   | <b>OR (95% CI)</b> |
|----------------------------------------------------------------------------------------------------------------------------------------------------------------------------------------------------------|--------------------|
| <b>Small-for-Gestational-Age Birth (&lt; 10<sup>th</sup> percentile)<sup>a</sup></b>                                                                                                                     |                    |
| <b>MW vs. GP</b>                                                                                                                                                                                         | 0.71 (0.61-0.82)   |
| <b>MW vs. OB</b>                                                                                                                                                                                         | 0.59 (0.51-0.70)   |
| <b>GP vs. OB</b>                                                                                                                                                                                         | 0.84 (0.77-0.93)   |
| <b>Preterm Birth (&lt; 37 weeks gestation)<sup>b</sup></b>                                                                                                                                               |                    |
| <b>MW vs. GP</b>                                                                                                                                                                                         | 0.72 (0.61-0.84)   |
| <b>MW vs. OB</b>                                                                                                                                                                                         | 0.52 (0.43-0.61)   |
| <b>GP vs. OB</b>                                                                                                                                                                                         | 0.72 (0.65-0.80)   |
| <b>Low Birth Weight (&lt;2500 g.)</b>                                                                                                                                                                    |                    |
| <b>MW vs. GP</b>                                                                                                                                                                                         | 0.66 (0.53-0.82)   |
| <b>MW vs. OB</b>                                                                                                                                                                                         | 0.44 (0.35-0.56)   |
| <b>GP vs. OB</b>                                                                                                                                                                                         | 0.67 (0.59-0.76)   |
| All models adjusted for maternal age, parity, pre-pregnancy BMI, infant sex, smoking status and substance use.                                                                                           |                    |
| <sup>a</sup> Model also adjusted for mental illness, and LHA socioeconomic rank.                                                                                                                         |                    |
| <sup>b</sup> Model also adjusted for delivery year, receipt of social assistance, alcohol use, mental illness, neighbourhood SEP, LHA socioeconomic rank, LHA income inequality, and northern residence. |                    |
